# Supplementary material for: Artemselenoids A–H, eight guaiane-type sesquiterpenoid dimers from Artemisia selengensis and their antihepatoma activities
Source: Royal Society of Chemistry journal article supplement (doi:10.1039/d5ob00222b), 2025-01-01
Supplement: d5ob00222b1.pdf [file d5ob00222b1.pdf]

## SUPPLEMENTARY INFORMATION

### **Artemselenoids A–H, eight guaiane-type sesquiterpenoid dimers from *Artemisia selengensis* and their antihepatoma activities**

Rong-Kai Chen<sup>a,b</sup>, Tian-Ze Li<sup>a</sup>, Yun-Bao Ma<sup>a</sup>, Yong-Cui Wang<sup>a</sup>, Ji-Jun Chen<sup>a,b\*</sup>

<sup>a</sup> State Key Laboratory of Phytochemistry and Plant Resources in West China, Kunming  
Institute of Botany, Chinese Academy of Sciences, Kunming 650201, People's Republic of  
China

<sup>b</sup> University of Chinese Academy of Sciences, Beijing 100049, People's Republic of China

\*Corresponding author. Prof. Dr. Ji-Jun Chen, State Key Laboratory of Phytochemistry and  
Plant Resources in West China, Kunming Institute of Botany, Chinese Academy of Sciences,  
No. 132 Lanhei Road, Kunming 650201, Yunnan, People's Republic of China

Phone: + 86-871-65223265, Fax: + 86-871-65227197, E-mail address:  
chenjj@mail.kib.ac.cn

## List of Supplementary materials

|                                                                                                            |    |
|------------------------------------------------------------------------------------------------------------|----|
| General Experimental Instruments and Procedures.....                                                       | 6  |
| S1. <sup>1</sup> H NMR (600 MHz, CDCl <sub>3</sub> ) spectrum of compound <b>1</b> .....                   | 7  |
| S2. <sup>13</sup> C NMR (DEPT) (150 MHz, CDCl <sub>3</sub> ) spectrum of compound <b>1</b> .....           | 8  |
| S3. <sup>1</sup> H- <sup>1</sup> H COSY (600 MHz, CDCl <sub>3</sub> ) spectrum of compound <b>1</b> .....  | 9  |
| S4. HSQC spectrum of compound <b>1</b> .....                                                               | 10 |
| S5. HMBC spectrum of compound <b>1</b> .....                                                               | 11 |
| S6. ROESY spectrum of compound <b>1</b> .....                                                              | 12 |
| S7. [α] <sub>D</sub> spectrum of compound <b>1</b> in MeOH.....                                            | 13 |
| S8. IR spectrum of compound <b>1</b> .....                                                                 | 13 |
| S9. ECD and UV spectra of compound <b>1</b> .....                                                          | 14 |
| S10. HRESIMS of compound <b>1</b> .....                                                                    | 15 |
| S11. <sup>1</sup> H NMR (600 MHz, CDCl <sub>3</sub> ) spectrum of compound <b>2</b> .....                  | 16 |
| S12. <sup>13</sup> C NMR (DEPT) (150 MHz, CDCl <sub>3</sub> ) spectrum of compound <b>2</b> .....          | 17 |
| S13. <sup>1</sup> H- <sup>1</sup> H COSY spectrum of compound <b>2</b> .....                               | 18 |
| S14. HSQC spectrum of compound <b>2</b> .....                                                              | 19 |
| S15. HMBC spectrum of compound <b>2</b> .....                                                              | 20 |
| S16. ROESY spectrum of compound <b>2</b> .....                                                             | 21 |
| S17. [α] <sub>D</sub> spectrum of compound <b>2</b> in MeOH.....                                           | 22 |
| S18. IR spectrum of compound <b>2</b> .....                                                                | 22 |
| S19. ECD and UV spectra of compound <b>2</b> .....                                                         | 23 |
| S20. HRESIMS of compound <b>2</b> .....                                                                    | 24 |
| S21. <sup>1</sup> H NMR (600 MHz, CDCl <sub>3</sub> ) spectrum of compound <b>3</b> .....                  | 25 |
| S22. <sup>13</sup> C NMR (DEPT) (150 MHz, CDCl <sub>3</sub> ) spectrum of compound <b>3</b> .....          | 26 |
| S23. <sup>1</sup> H- <sup>1</sup> H COSY (600 MHz, CDCl <sub>3</sub> ) spectrum of compound <b>3</b> ..... | 27 |
| S24. HSQC spectrum of compound <b>3</b> .....                                                              | 28 |
| S25. HMBC spectrum of compound <b>3</b> .....                                                              | 29 |
| S26. ROESY spectrum of compound <b>3</b> .....                                                             | 30 |
| S27. [α] <sub>D</sub> spectrum of compound <b>3</b> in MeOH.....                                           | 31 |
| S28. IR spectrum of compound <b>3</b> .....                                                                | 31 |
| S29. ECD and UV spectra of compound <b>3</b> .....                                                         | 32 |

|                                                                                                            |    |
|------------------------------------------------------------------------------------------------------------|----|
| S30. HRESIMS of compound <b>3</b> .....                                                                    | 33 |
| S31. <sup>1</sup> H NMR (600 MHz, CDCl <sub>3</sub> ) spectrum of compound <b>4</b> .....                  | 34 |
| S32. <sup>13</sup> C NMR (DEPT) (150 MHz, CDCl <sub>3</sub> ) spectrum of compound <b>4</b> .....          | 35 |
| S33. <sup>1</sup> H- <sup>1</sup> H COSY (600 MHz, CDCl <sub>3</sub> ) spectrum of compound <b>4</b> ..... | 36 |
| S34. HSQC spectrum of compound <b>4</b> .....                                                              | 37 |
| S35. HMBC spectrum of compound <b>4</b> .....                                                              | 38 |
| S36. ROESY spectrum of compound <b>4</b> .....                                                             | 39 |
| S37. [α] <sub>D</sub> spectrum of compound <b>4</b> in MeOH.....                                           | 40 |
| S38. IR spectrum of compound <b>4</b> .....                                                                | 40 |
| S39. ECD and UV spectra of compound <b>4</b> .....                                                         | 41 |
| S40. HRESIMS of compound <b>4</b> .....                                                                    | 42 |
| S41. <sup>1</sup> H NMR (600 MHz, CDCl <sub>3</sub> ) spectrum of compound <b>5</b> .....                  | 43 |
| S42. <sup>13</sup> C NMR (DEPT) (150 MHz, CDCl <sub>3</sub> ) spectrum of compound <b>5</b> .....          | 44 |
| S43. <sup>1</sup> H- <sup>1</sup> H COSY (600 MHz, CDCl <sub>3</sub> ) spectrum of compound <b>5</b> ..... | 45 |
| S44. HSQC spectrum of compound <b>5</b> .....                                                              | 46 |
| S45. HMBC spectrum of compound <b>5</b> .....                                                              | 47 |
| S46. ROESY spectrum of compound <b>5</b> .....                                                             | 48 |
| S47. [α] <sub>D</sub> spectrum of compound <b>5</b> in MeOH.....                                           | 49 |
| S48. IR spectrum of compound <b>5</b> .....                                                                | 49 |
| S49. ECD and UV spectra of compound <b>5</b> .....                                                         | 50 |
| S50. HRESIMS of compound <b>5</b> .....                                                                    | 51 |
| S51. <sup>1</sup> H NMR (600 MHz, CDCl <sub>3</sub> ) spectrum of compound <b>6</b> .....                  | 52 |
| S52. <sup>13</sup> C NMR (DEPT) (150 MHz, CDCl <sub>3</sub> ) spectrum of compound <b>6</b> .....          | 53 |
| S53. <sup>1</sup> H- <sup>1</sup> H COSY (600 MHz, CDCl <sub>3</sub> ) spectrum of compound <b>6</b> ..... | 54 |
| S54. HSQC spectrum of compound <b>6</b> .....                                                              | 55 |
| S55. HMBC spectrum of compound <b>6</b> .....                                                              | 56 |
| S56. ROESY spectrum of compound <b>6</b> .....                                                             | 57 |
| S57. [α] <sub>D</sub> spectrum of compound <b>6</b> in MeOH.....                                           | 58 |
| S58. IR spectrum of compound <b>6</b> .....                                                                | 58 |
| S59. ECD and UV spectra of compound <b>6</b> .....                                                         | 59 |
| S60. HRESIMS of compound <b>6</b> .....                                                                    | 60 |
| S61. <sup>1</sup> H NMR (600 MHz, CDCl <sub>3</sub> ) spectrum of compound <b>7</b> .....                  | 61 |

|                                                                                                                                   |    |
|-----------------------------------------------------------------------------------------------------------------------------------|----|
| S62. <sup>13</sup> C NMR (DEPT) (150 MHz, CDCl <sub>3</sub> ) spectrum of compound <b>7</b> .....                                 | 62 |
| S63. <sup>1</sup> H- <sup>1</sup> H COSY (600 MHz, CDCl <sub>3</sub> ) spectrum of compound <b>7</b> .....                        | 63 |
| S64. HSQC spectrum of compound <b>7</b> .....                                                                                     | 64 |
| S65. HMBC spectrum of compound <b>7</b> .....                                                                                     | 65 |
| S66. ROESY spectrum of compound <b>7</b> .....                                                                                    | 66 |
| S67. [α] <sub>D</sub> spectrum of compound <b>7</b> in MeOH.....                                                                  | 67 |
| S68. IR spectrum of compound <b>7</b> .....                                                                                       | 67 |
| S69. ECD and UV spectra of compound <b>7</b> .....                                                                                | 68 |
| S70. HRESIMS of compound <b>7</b> .....                                                                                           | 69 |
| S71. <sup>1</sup> H NMR (600 MHz, CDCl <sub>3</sub> ) spectrum of compound <b>8</b> .....                                         | 70 |
| S72. <sup>13</sup> C NMR (DEPT) (150 MHz, CDCl <sub>3</sub> ) spectrum of compound <b>8</b> .....                                 | 71 |
| S73. <sup>1</sup> H- <sup>1</sup> H COSY (600 MHz, CDCl <sub>3</sub> ) spectrum of compound <b>8</b> .....                        | 72 |
| S74. HSQC spectrum of compound <b>8</b> .....                                                                                     | 73 |
| S75. HMBC spectrum of compound <b>8</b> .....                                                                                     | 74 |
| S76. ROESY spectrum of compound <b>8</b> .....                                                                                    | 75 |
| S77. [α] <sub>D</sub> spectrum of compound <b>8</b> in MeOH.....                                                                  | 76 |
| S78. IR spectrum of compound <b>8</b> .....                                                                                       | 76 |
| S79. ECD and UV spectra of compound <b>8</b> .....                                                                                | 77 |
| S80. HRESIMS of compound <b>8</b> .....                                                                                           | 78 |
| General results for NMR calculation .....                                                                                         | 79 |
| S81. Structures of two possible diastereoisomers of <b>1</b> (1a–1b).....                                                         | 79 |
| S82. Conformational analysis of the B3LYP-D3BJ/6-31G(d) optimized conformers of <b>1a</b> in the gas phase (T=298.15 K) .....     | 79 |
| S83. Cartesian coordinates for the low-energy Conf. of Compound <b>1a</b> at B3LYP/6311+G(d,p) level of theory in methanol .....  | 79 |
| S84. Conformational analysis of the B3LYP-D3BJ/6-31G(d) optimized conformers of <b>1b</b> in the gas phase (T=298.15 K) .....     | 83 |
| S85. Cartesian coordinates for the low-energy Conf. of Compound <b>1b</b> at B3LYP/6311+G(d,p) level of theory in methanol .....  | 83 |
| S86. Experimental and calculated <sup>13</sup> C NMR chemical shifts of <b>1a</b> and <b>1b</b> .....                             | 90 |
| S87. Experimental and calculated <sup>1</sup> H NMR chemical shifts of <b>1a</b> and <b>1b</b> .....                              | 90 |
| S88. Linear regression analysis between the experimental and calculated <sup>13</sup> C NMR chemical shifts of <b>1a/1b</b> ..... | 91 |

|                                                                                                                           |     |
|---------------------------------------------------------------------------------------------------------------------------|-----|
| S89. DP4+ probability analysis of 1a/1b. ....                                                                             | 91  |
| S90. Structures of two possible diastereoisomers of 6 (6a–6b).....                                                        | 92  |
| S91. Conformational analysis of the B3LYP-D3BJ/6-31G(d) optimized conformers of 6a in the gas phase (T=298.15 K) .....    | 92  |
| S92 Cartesian coordinates for the low-energy Conf. of Compound 6a at B3LYP/6311+G(d,p) level of theory in methanol .....  | 92  |
| S93. Conformational analysis of the B3LYP-D3BJ/6-31G(d) optimized conformers of 6b in the gas phase (T=298.15 K) .....    | 99  |
| S94 Cartesian coordinates for the low-energy Conf. of Compound 6b at B3LYP/6311+G(d,p) level of theory in methanol .....  | 99  |
| S95. Experimental and calculated <sup>13</sup> C NMR chemical shifts of 6a and 6b .....                                   | 107 |
| S96. Experimental and calculated <sup>1</sup> H NMR chemical shifts of 6a and 6b .....                                    | 107 |
| S97. Linear regression analysis between the experimental and calculated <sup>13</sup> C NMR chemical shifts of 6a/6b..... | 108 |
| S98. DP4+ probability analysis of 6a/6b. ....                                                                             | 108 |

## General Experimental Instruments and Procedures

High-resolution mass spectra were acquired using a Shimadzu LC/MS-IT-TOF system (Kyoto, Japan). UV absorption profiles were recorded on a Shimadzu UV2401PC spectrophotometer (Kyoto, Japan), while IR spectra (KBr pellets) were collected via a Bio-Rad FTS-135 spectrometer (CA, USA). Nuclear magnetic resonance (NMR) data were analyzed with a Bruker Advance III-600 spectrometer (Germany, 600 MHz) using TMS as the internal standard. Optical rotations were quantified with a JASCO P-1020 polarimeter (Tokyo, Japan). Electronic circular dichroism (ECD) spectra were captured on an Applied Photophysics dichromatograph (UK). Thin-layer chromatography (TLC) was conducted using silica gel GF254 plates sourced from Yantai Jiangyou Silicon Development Company (Yantai, China). The spots were visualized under UV light or by heating after being sprayed with a 10% H<sub>2</sub>SO<sub>4</sub> solution in ethanol (v/v). For column chromatography, 200–300 mesh silica gel (Linyi Haixiang, Linyi, China), and Sephadex LH-20 (GE Healthcare Bio-Sciences AB, Uppsala, Sweden) were employed. High-performance liquid chromatography (HPLC) was performed on a Shimadzu LC-20AT system equipped with Shim-pack GIST-C18 (5 μm, 9.4 × 250 mm) columns and a CXTH-LC-3000 system fitted with Agilent XDB-C18 (5 μm, 9.4 × 250 mm) columns.

The human hepatocellular carcinoma cell lines HepG2, Huh7, and SK-Hep-1 were purchased from Shanghai Jining Biotechnology Co., Ltd (Shanghai, China) and cultured in a CO<sub>2</sub> incubator (Model 3111, Thermo Fisher Scientific Co., Ltd., Suzhou, China) at 37°C with 5% CO<sub>2</sub>, 95% air, and >95% humidity. HepG2 and SK-Hep-1 cells were maintained in Minimum Essential Medium (MEM, Cat# C3050-0500, VivaCell, Shanghai, China) supplemented with 10% (v/v) heat-inactivated fetal bovine serum (FBS, Gibco, Life Technologies, NY, USA), while Huh7 cells were cultured in Dulbecco's Modified Eagle Medium (DMEM, Cat# C3112-0500, VivaCell, Shanghai, China) with 10% (v/v) heat-inactivated FBS. Sorafenib (purity >99% by HPLC, Aladdin Biotechnology Co., Ltd., Shanghai, China) was used as the positive control. Cell viability was assessed using the MTT colorimetric assay (Cat# M1020, BioFROXX, Saiguo Biotech Co., Ltd., Guangzhou, China), and absorbance was measured at 490 nm using a Varioskan Lux multimode microplate reader (Thermo Fisher Scientific Co., Ltd., Suzhou, China).

S1. <sup>1</sup>H NMR (600 M)

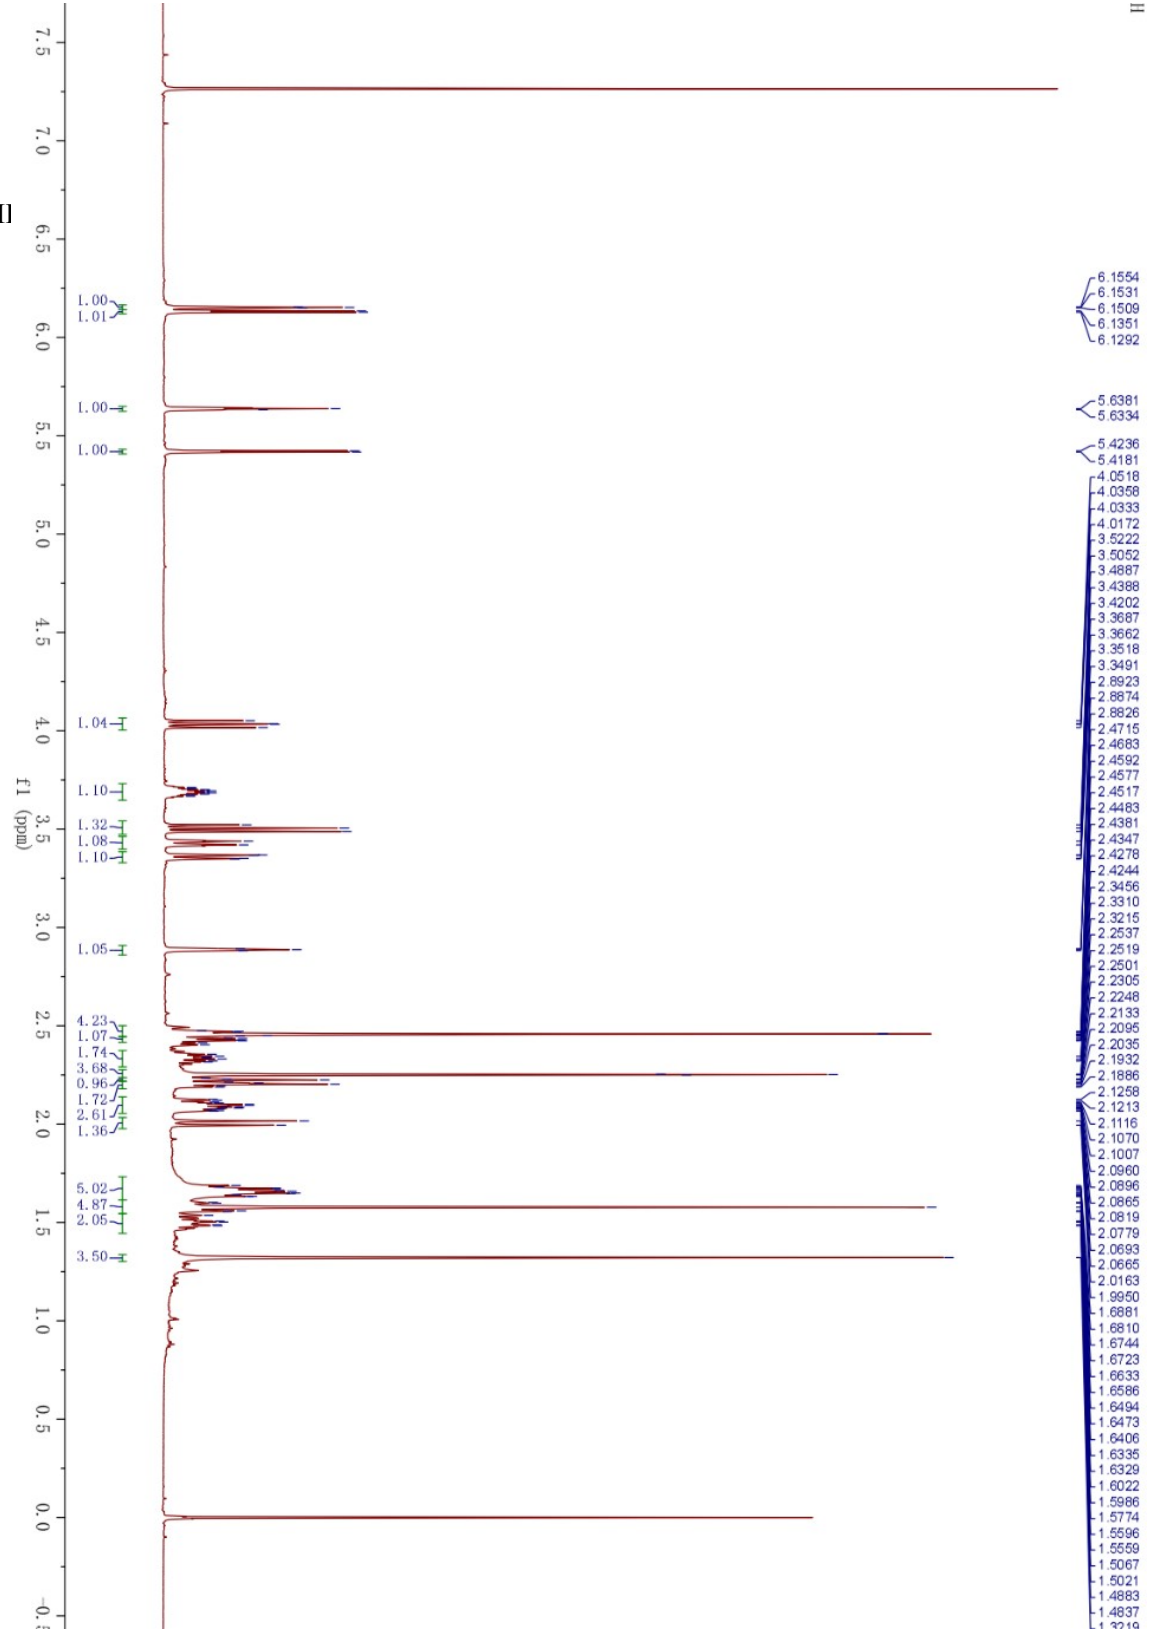

S2. <sup>13</sup>C NMR (DEPT)

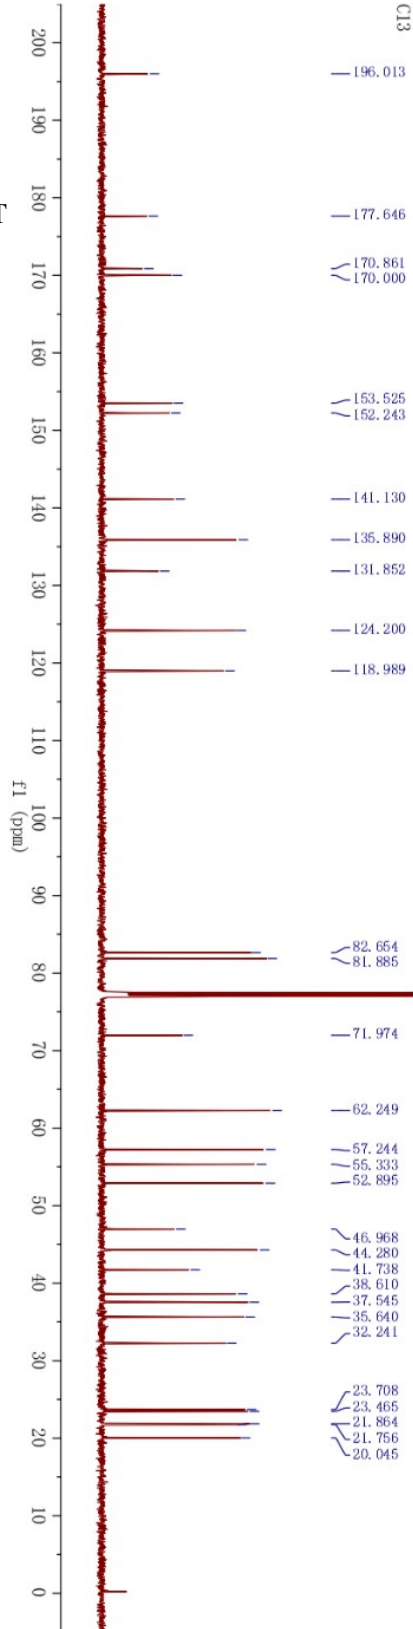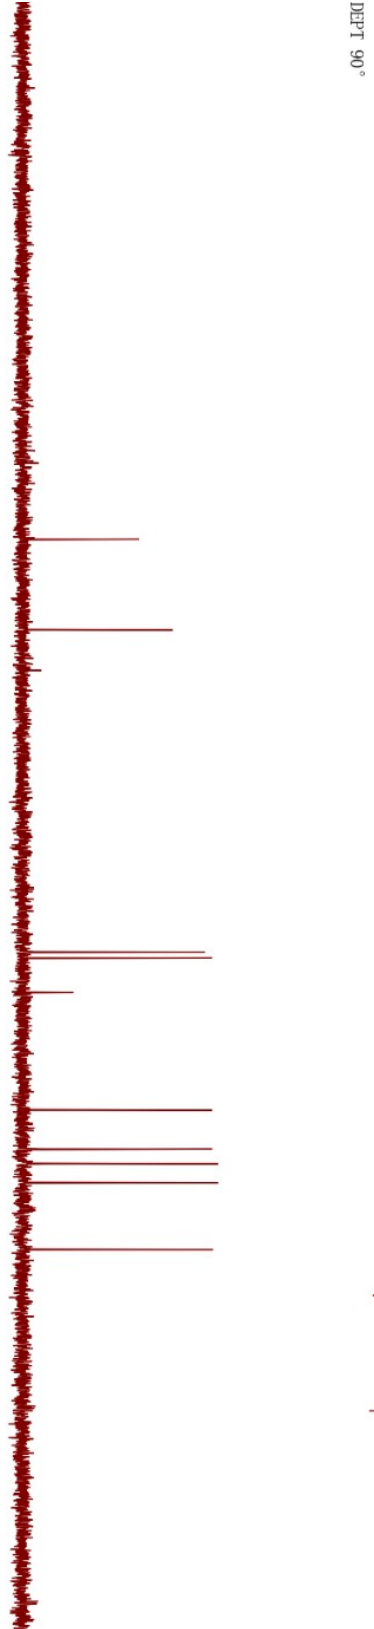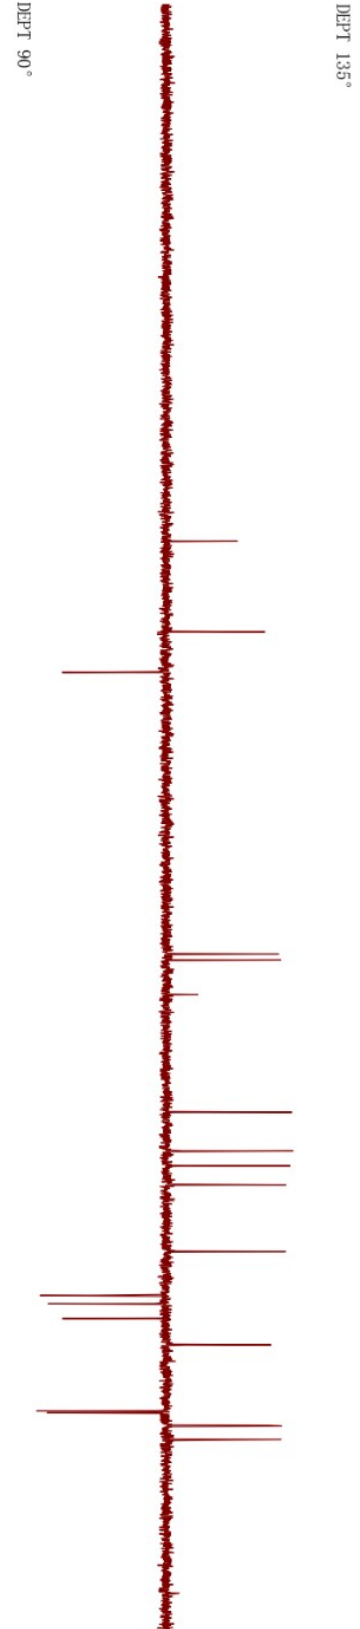



S3.  $^1\text{H}$ - $^1\text{H}$  COSY (60)

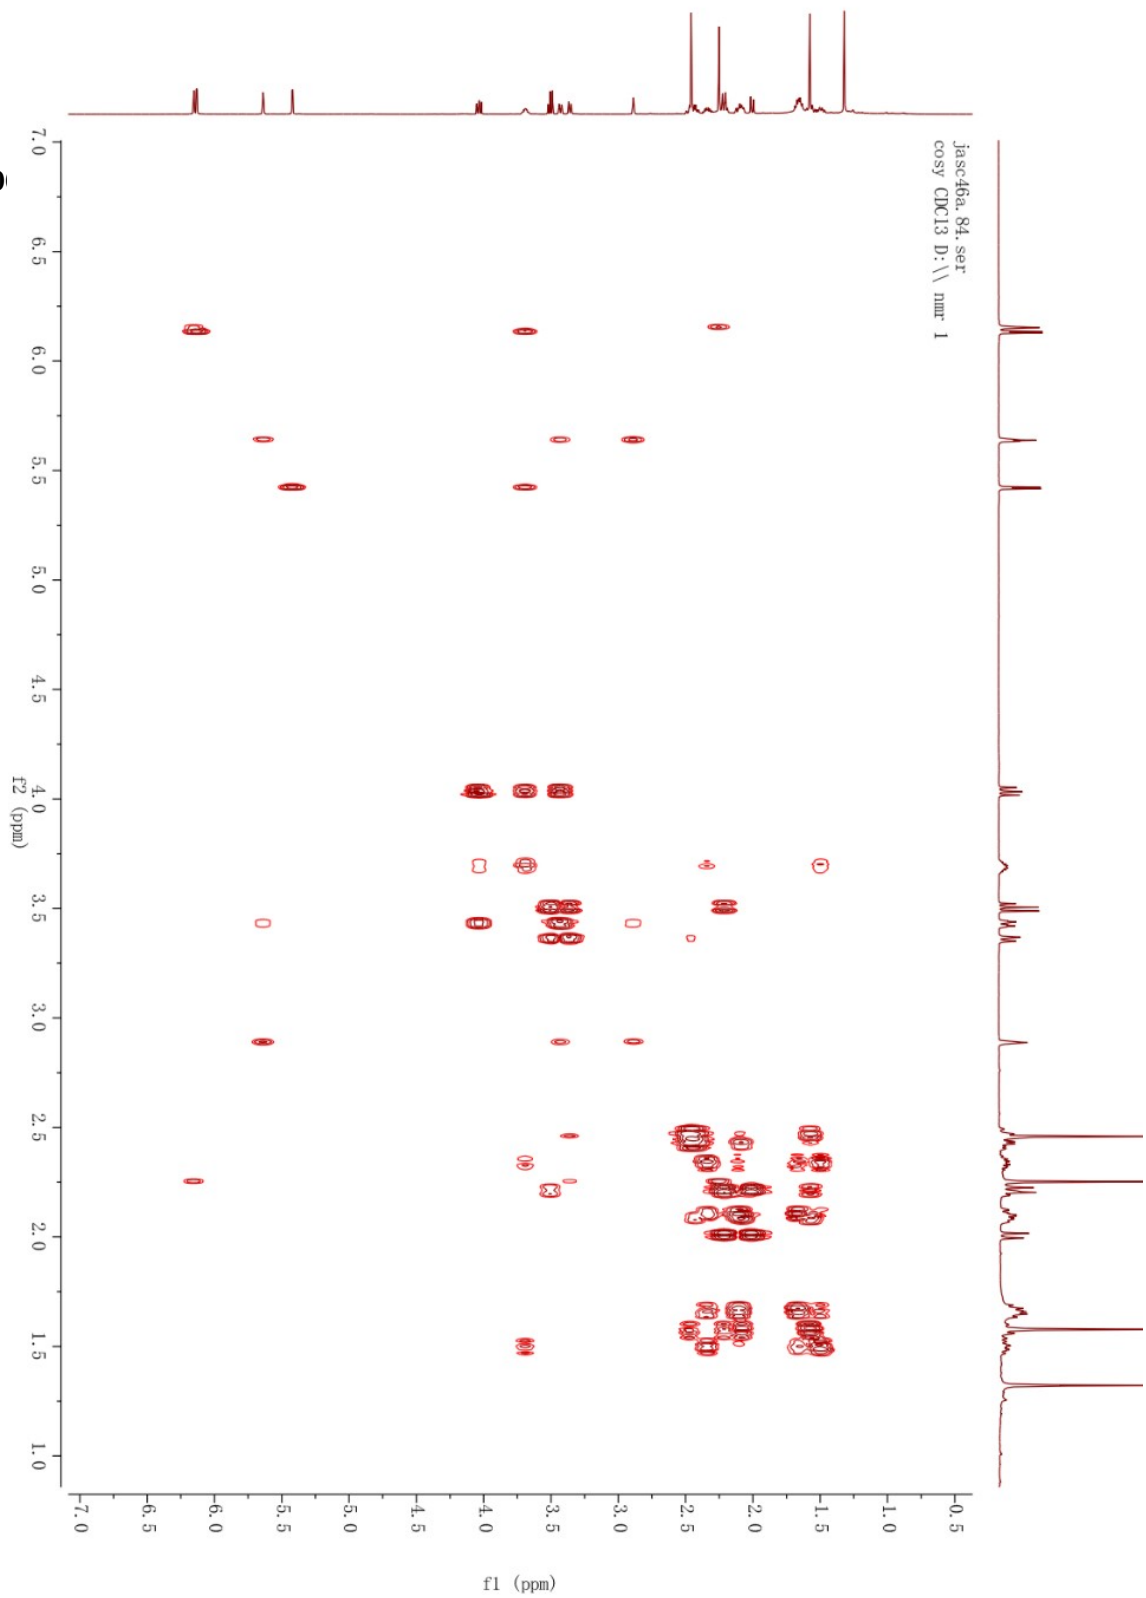

S4. HSQC spectrum

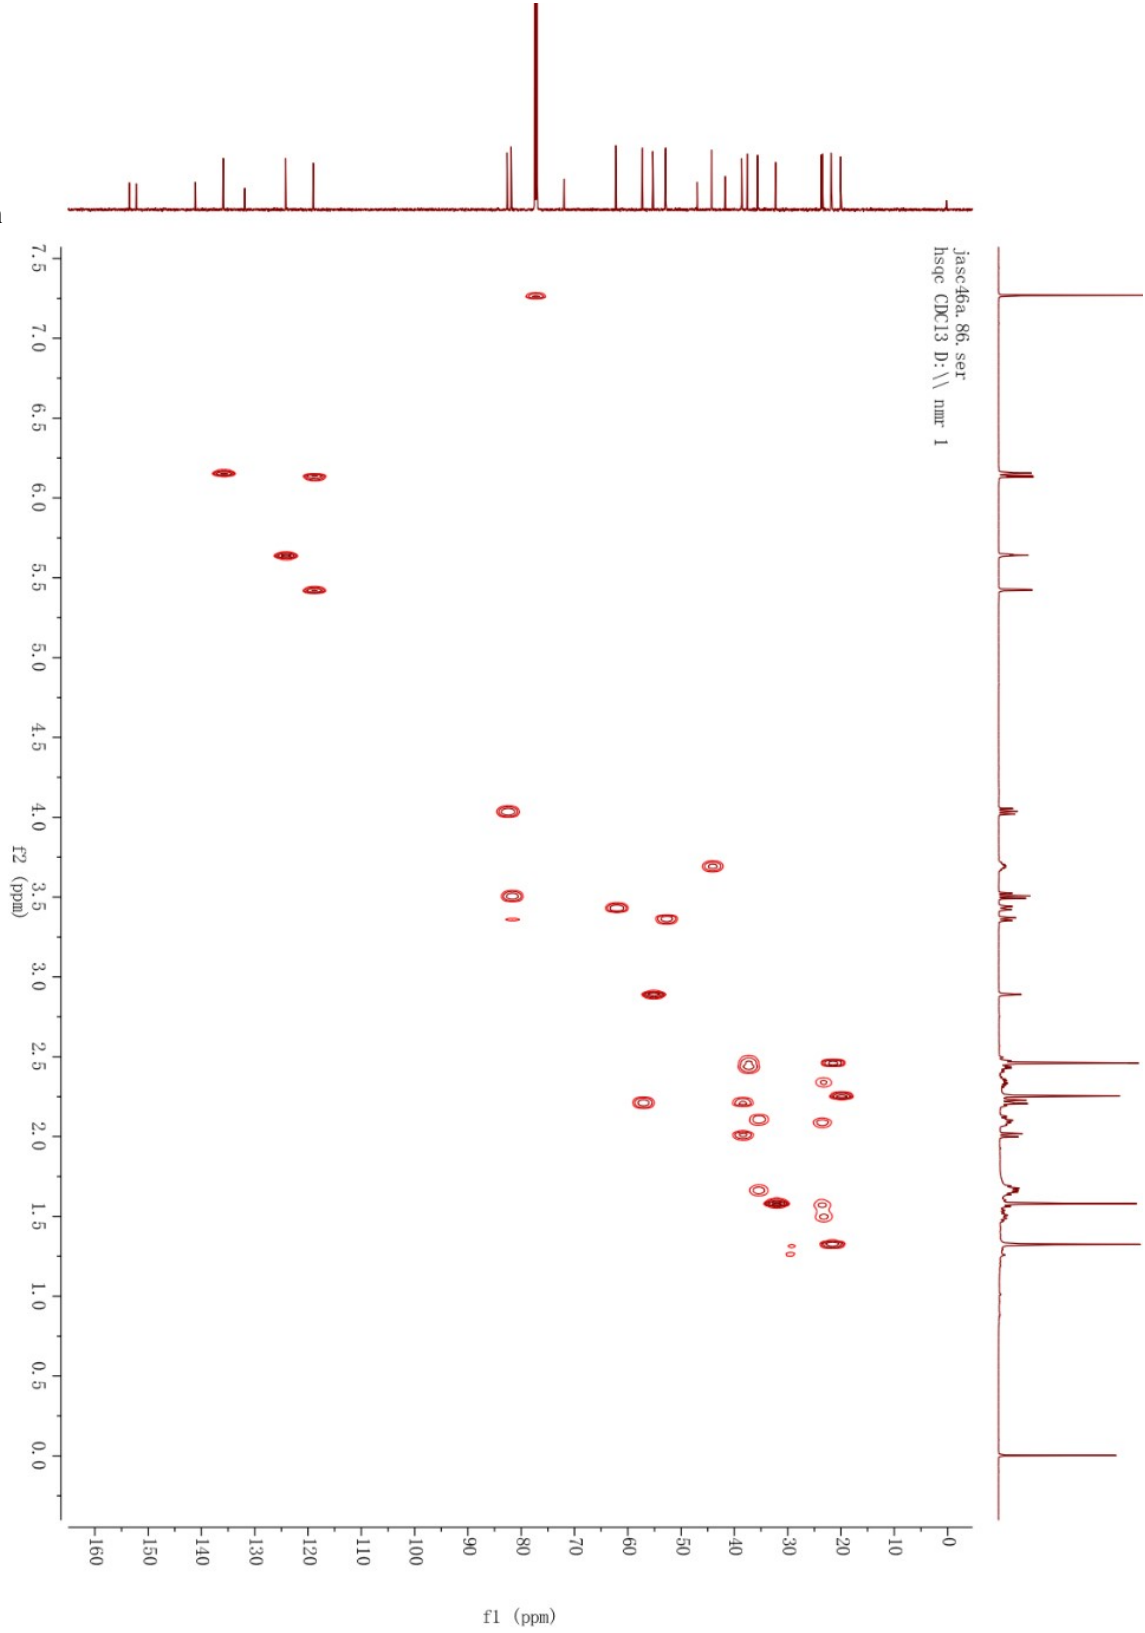

S5. HMBC spectrum

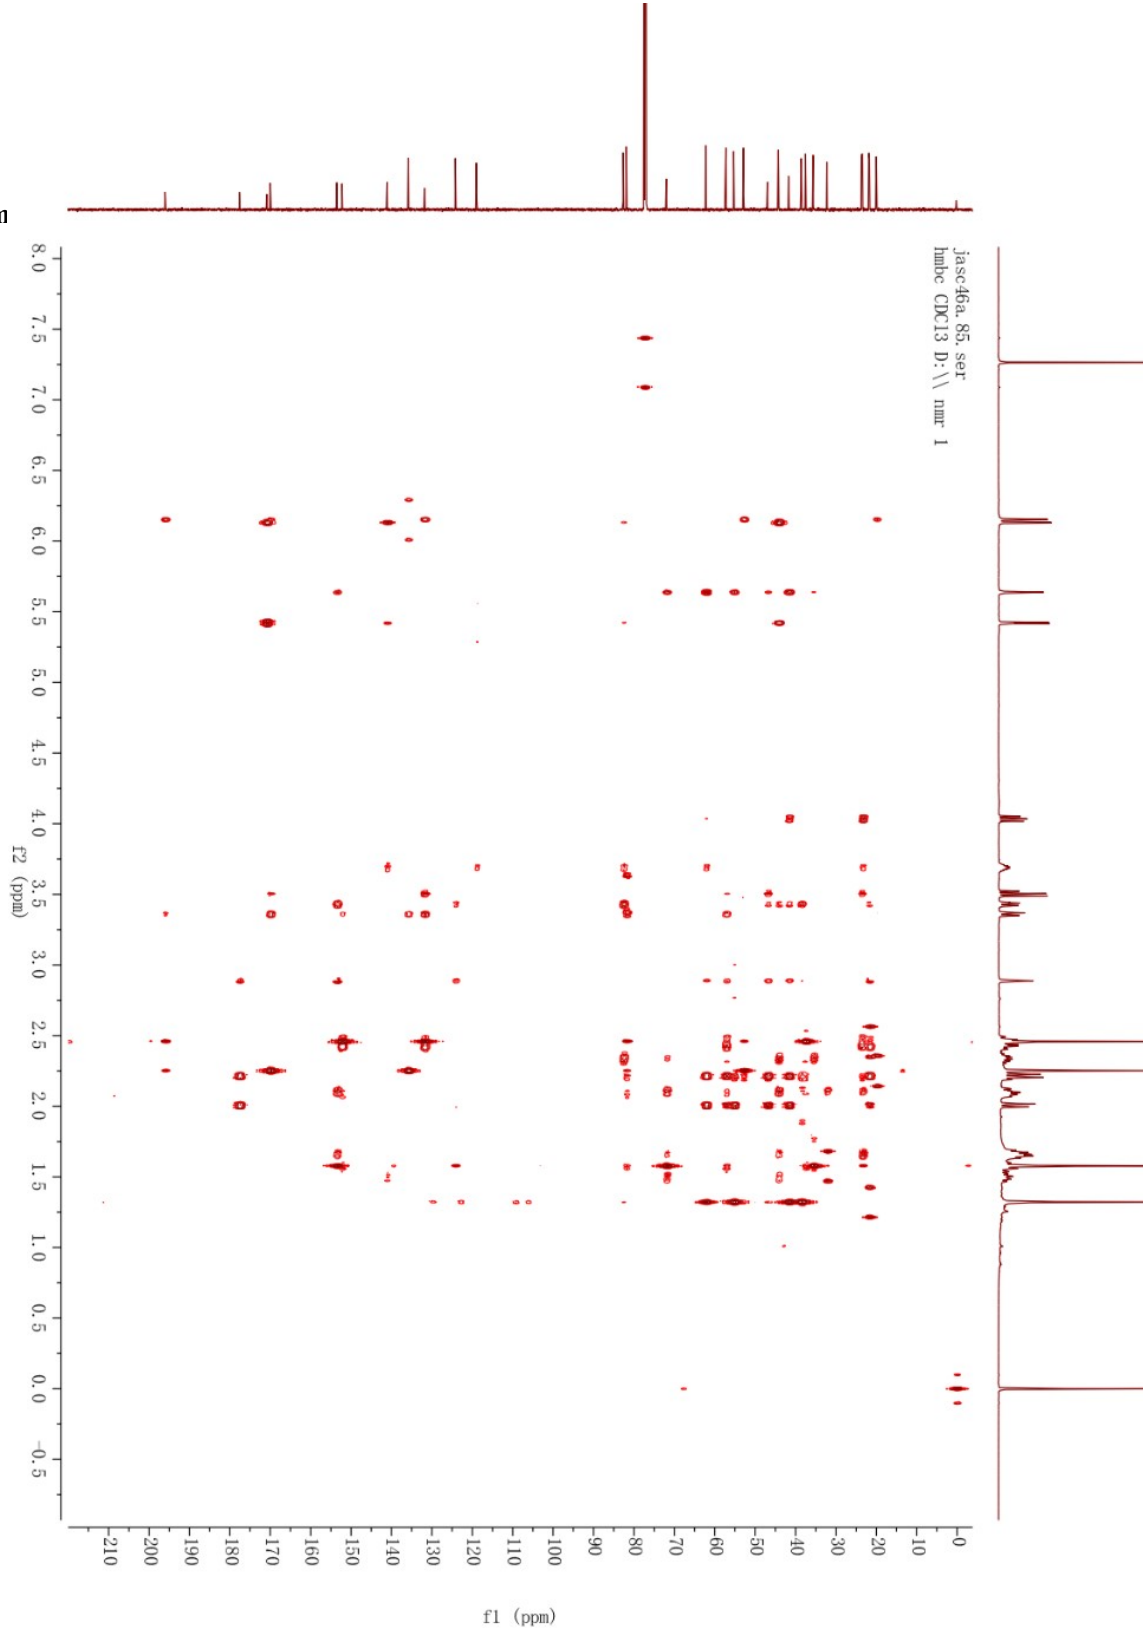

S6. ROESY spectrur

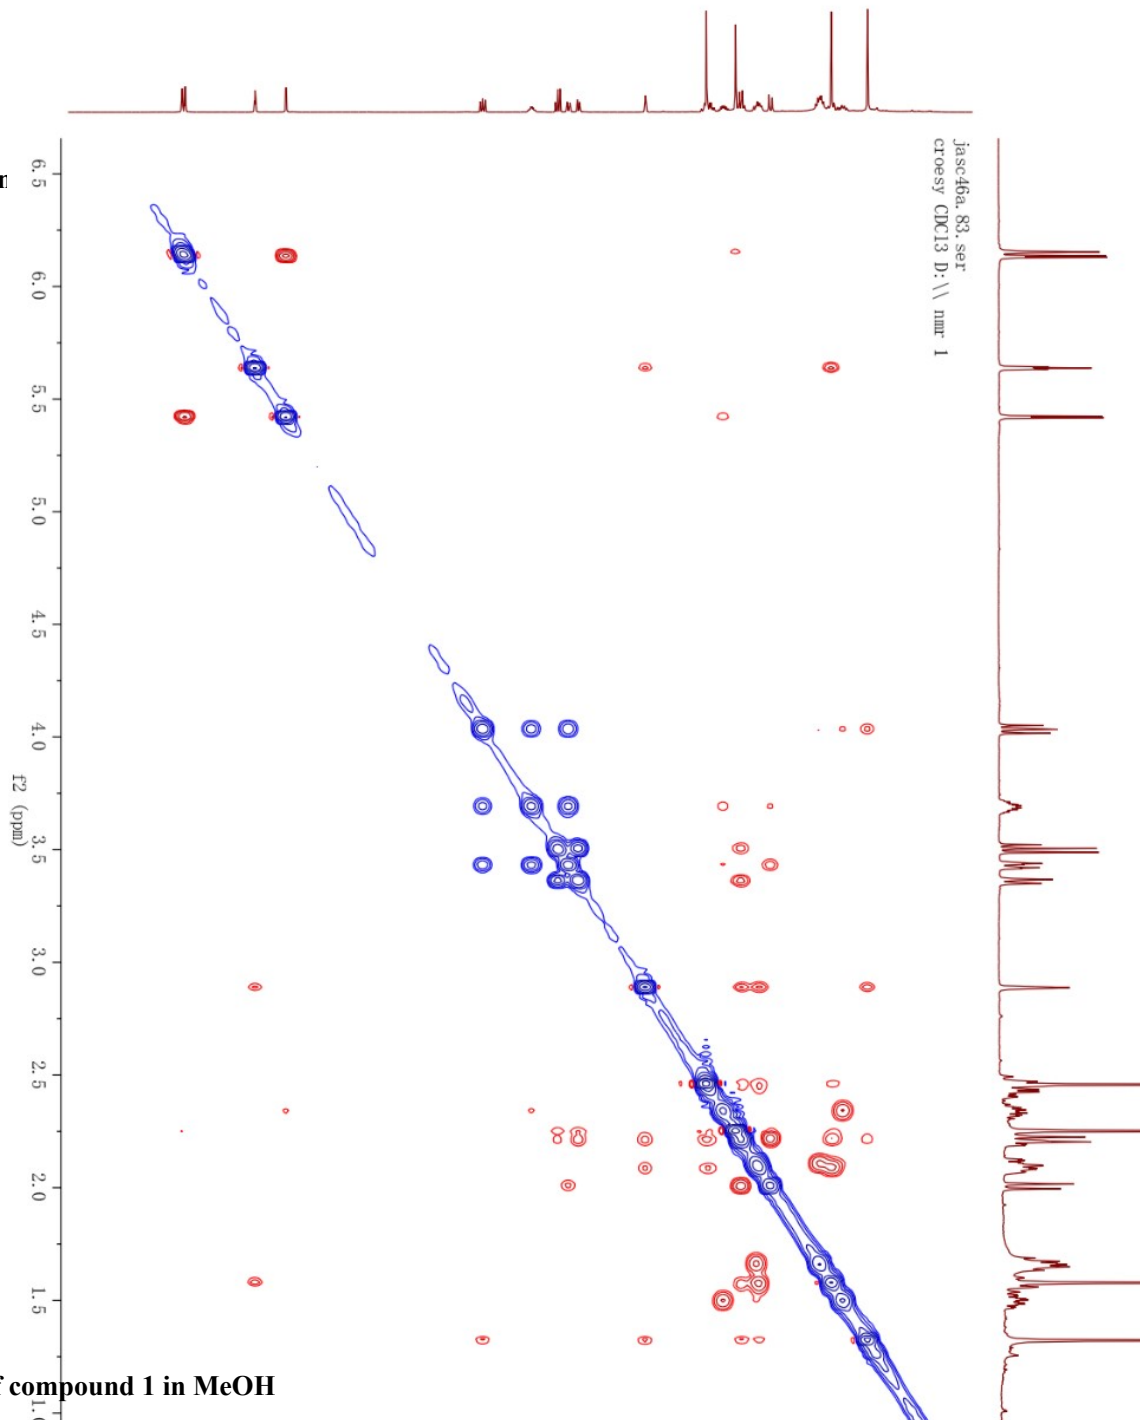

S7.  $[\alpha]_D$  spectrum of compound 1 in MeOH

**Rudolph Research Analytical**

This sample was measured on an Autopol VI, Serial #91058  
 Manufactured by Rudolph Research Analytical, Hackettstown, NJ, USA.

Measurement Date : Wednesday, 11-DEC-2024

Set Temperature : 20.0

Time Delay : Disabled

Delay between Measurement : Disabled

| <u>n</u> | <u>Average</u> | <u>Std.Dev.</u> | <u>% RSD</u> | <u>Maximum</u> | <u>Minimum</u> |
|----------|----------------|-----------------|--------------|----------------|----------------|
| 5        | -104.86        | 0.42            | -0.40        | -104.67        | -105.61        |

| <u>S.No</u> | <u>Sample ID</u> | <u>Time</u> | <u>Result</u> | <u>Scale</u> | <u>OR °Arc</u> | <u>WLG.nm</u> | <u>Lq.mm</u> | <u>Conc.g/100ml</u> | <u>Temp.</u> |
|-------------|------------------|-------------|---------------|--------------|----------------|---------------|--------------|---------------------|--------------|
| 1           | JASC-46          | 02:45:39 PM | -104.67       | SR           | -0.112         | 589           | 100.00       | 0.107               | 20.0         |
| 2           | JASC-46          | 02:45:46 PM | -105.61       | SR           | -0.113         | 589           | 100.00       | 0.107               | 20.0         |
| 3           | JASC-46          | 02:45:52 PM | -104.67       | SR           | -0.112         | 589           | 100.00       | 0.107               | 20.0         |
| 4           | JASC-46          | 02:45:58 PM | -104.67       | SR           | -0.112         | 589           | 100.00       | 0.107               | 20.0         |
| 5           | JASC-46          | 02:46:05 PM | -104.67       | SR           | -0.112         | 589           | 100.00       | 0.107               | 20.0         |

## S8. IR spectrum of compound 1

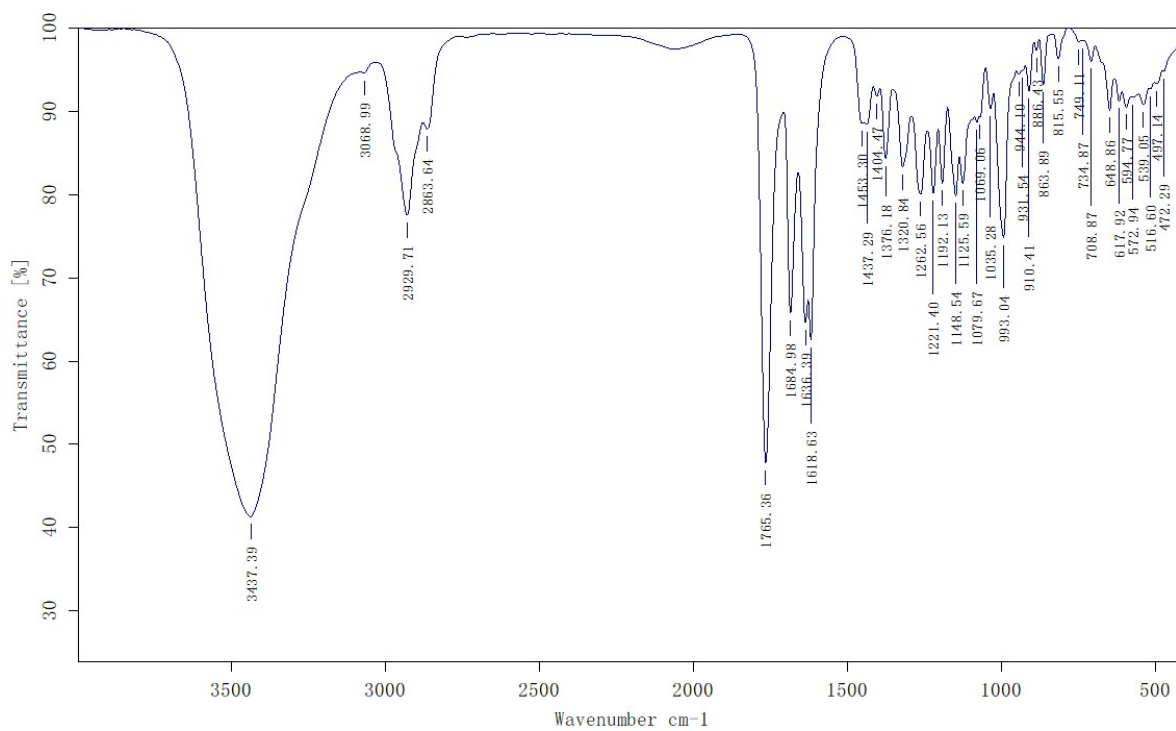

Sample Name: jasc-46I

Sample Form: KBr

Path of File: E:\data

Date of Measurement: 2025/1/2

Resolution: 4

Aperture Setting: 6 mm

Number of Background Scans: 16

Number of Sample Scans: 16

Beamsplitter Setting: KBr

Source Setting: MIR

Instrument Type: BRUKER VERTEX 70

Soft Version: OPUS 8.1

### S9. ECD and UV spectra of compound 1

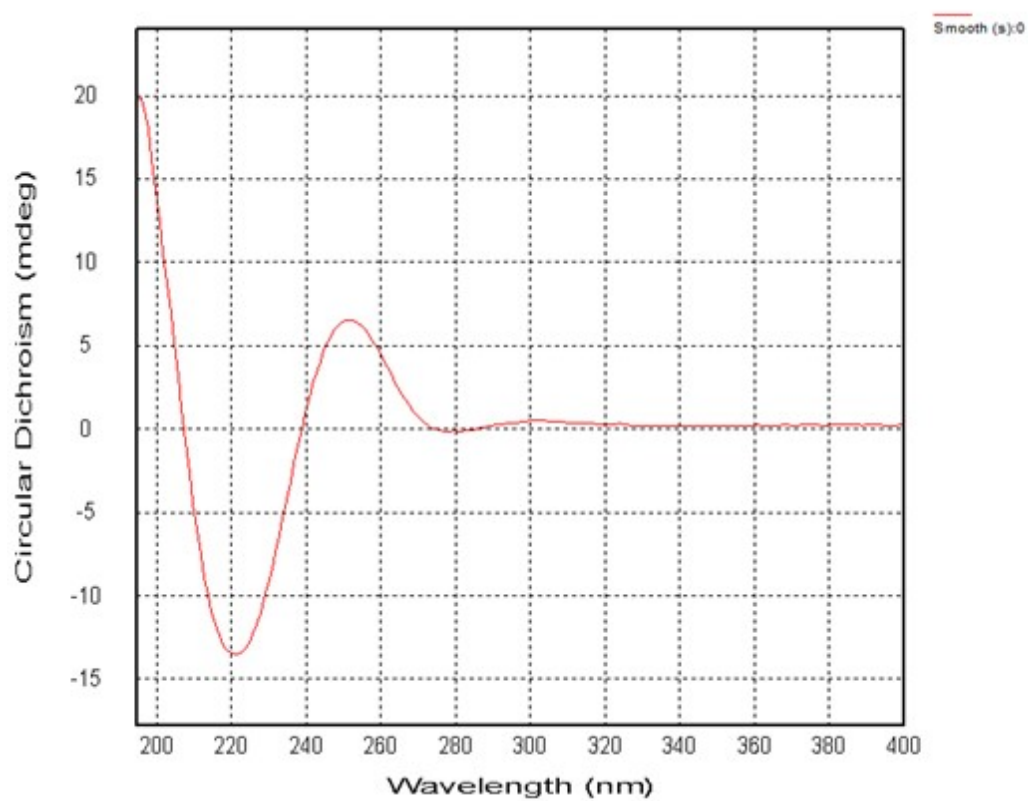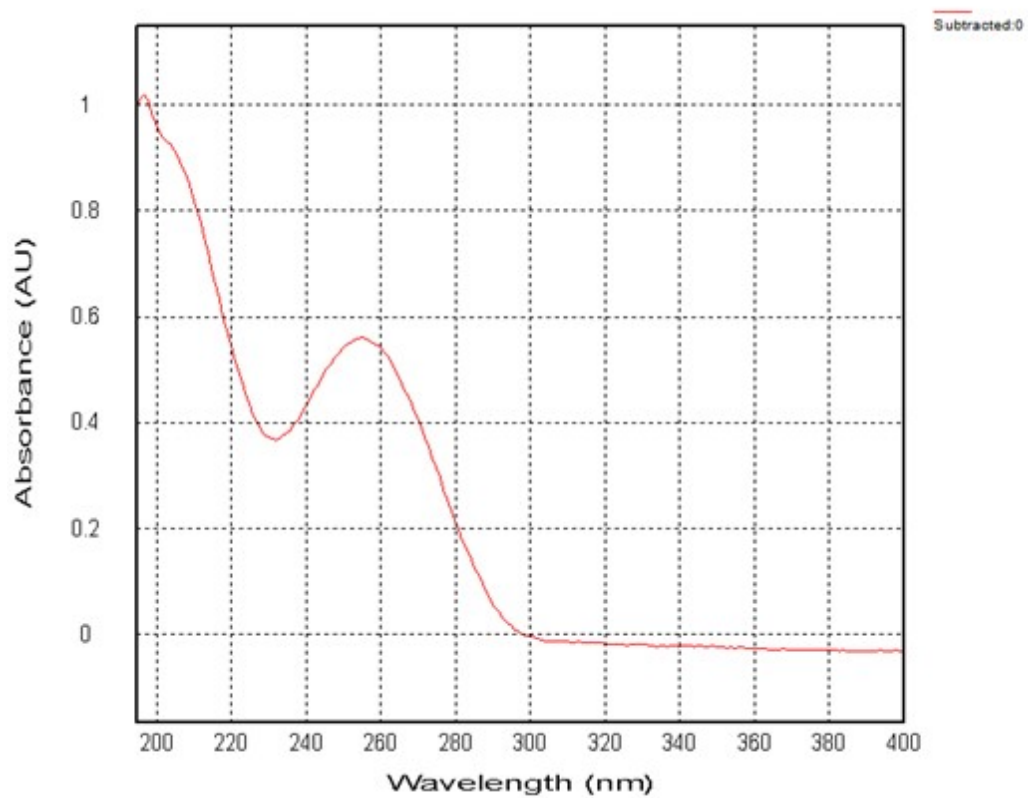

## S10. HRESIMS of compound 1

| Elmt | Val. | Min | Max | Elmt | Val. | Min | Max | Use Adduct |
|------|------|-----|-----|------|------|-----|-----|------------|
| H    | 1    | 0   | 300 | O    | 2    | 0   | 20  | H          |
| C    | 4    | 0   | 150 | Cl   | 1    | 0   | 0   | Na         |
| N    | 3    | 0   | 1   |      |      |     |     |            |

Error Margin (ppm): 100

HC Ratio: unlimited

Max Isotopes: all

MSn Iso RI (%): 75.00

DBE Range: -2.0 - 1000.0

Apply N Rule: yes

Isotope RI (%): 1.00

MSn Logic Mode: AND

Electron Ions: both

Use MSn Info: no

Isotope Res: 10000

Max Results: 500

Event#: 1 MS(E+) Ret. Time : 14.480 Scan#: 2172

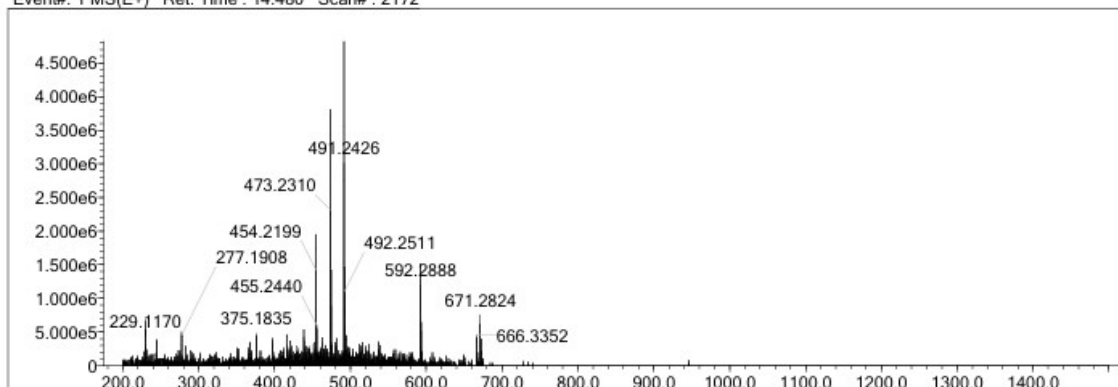

Measured region for 491.2426 m/z

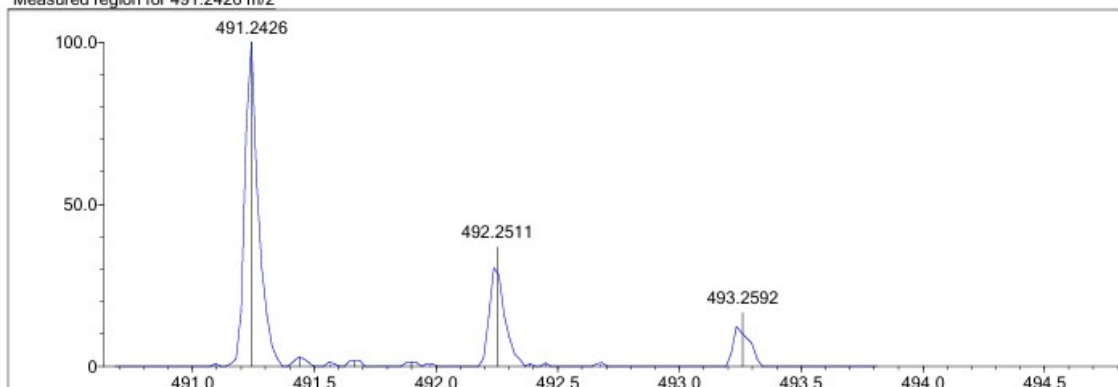

C30 H34 O6 [M+H]<sup>+</sup> : Predicted region for 491.2428 m/z

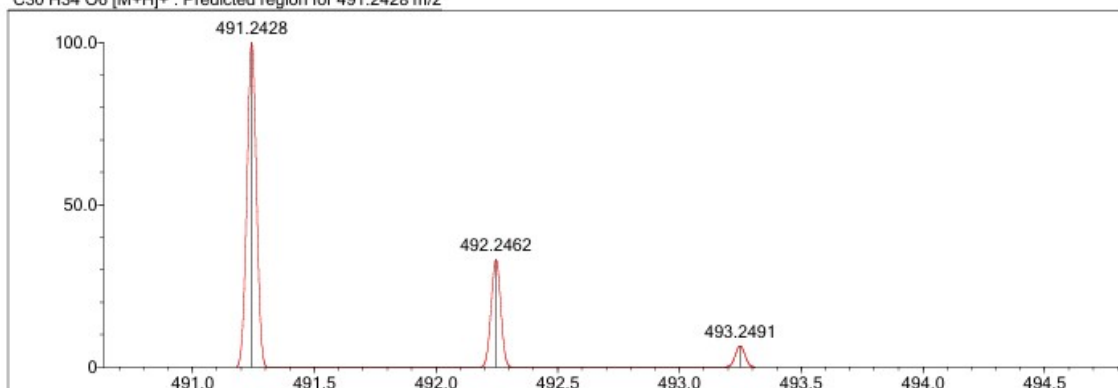

| Rank | Score | Formula (M) | Ion                | Meas. m/z | Pred. m/z | Df. (mDa) | Df. (ppm) | Iso   | DBE  |
|------|-------|-------------|--------------------|-----------|-----------|-----------|-----------|-------|------|
| 1    | 62.00 | C30 H34 O6  | [M+H] <sup>+</sup> | 491.2426  | 491.2428  | -0.2      | -0.41     | 62.00 | 14.0 |

S11. <sup>1</sup>H NMR (600 M

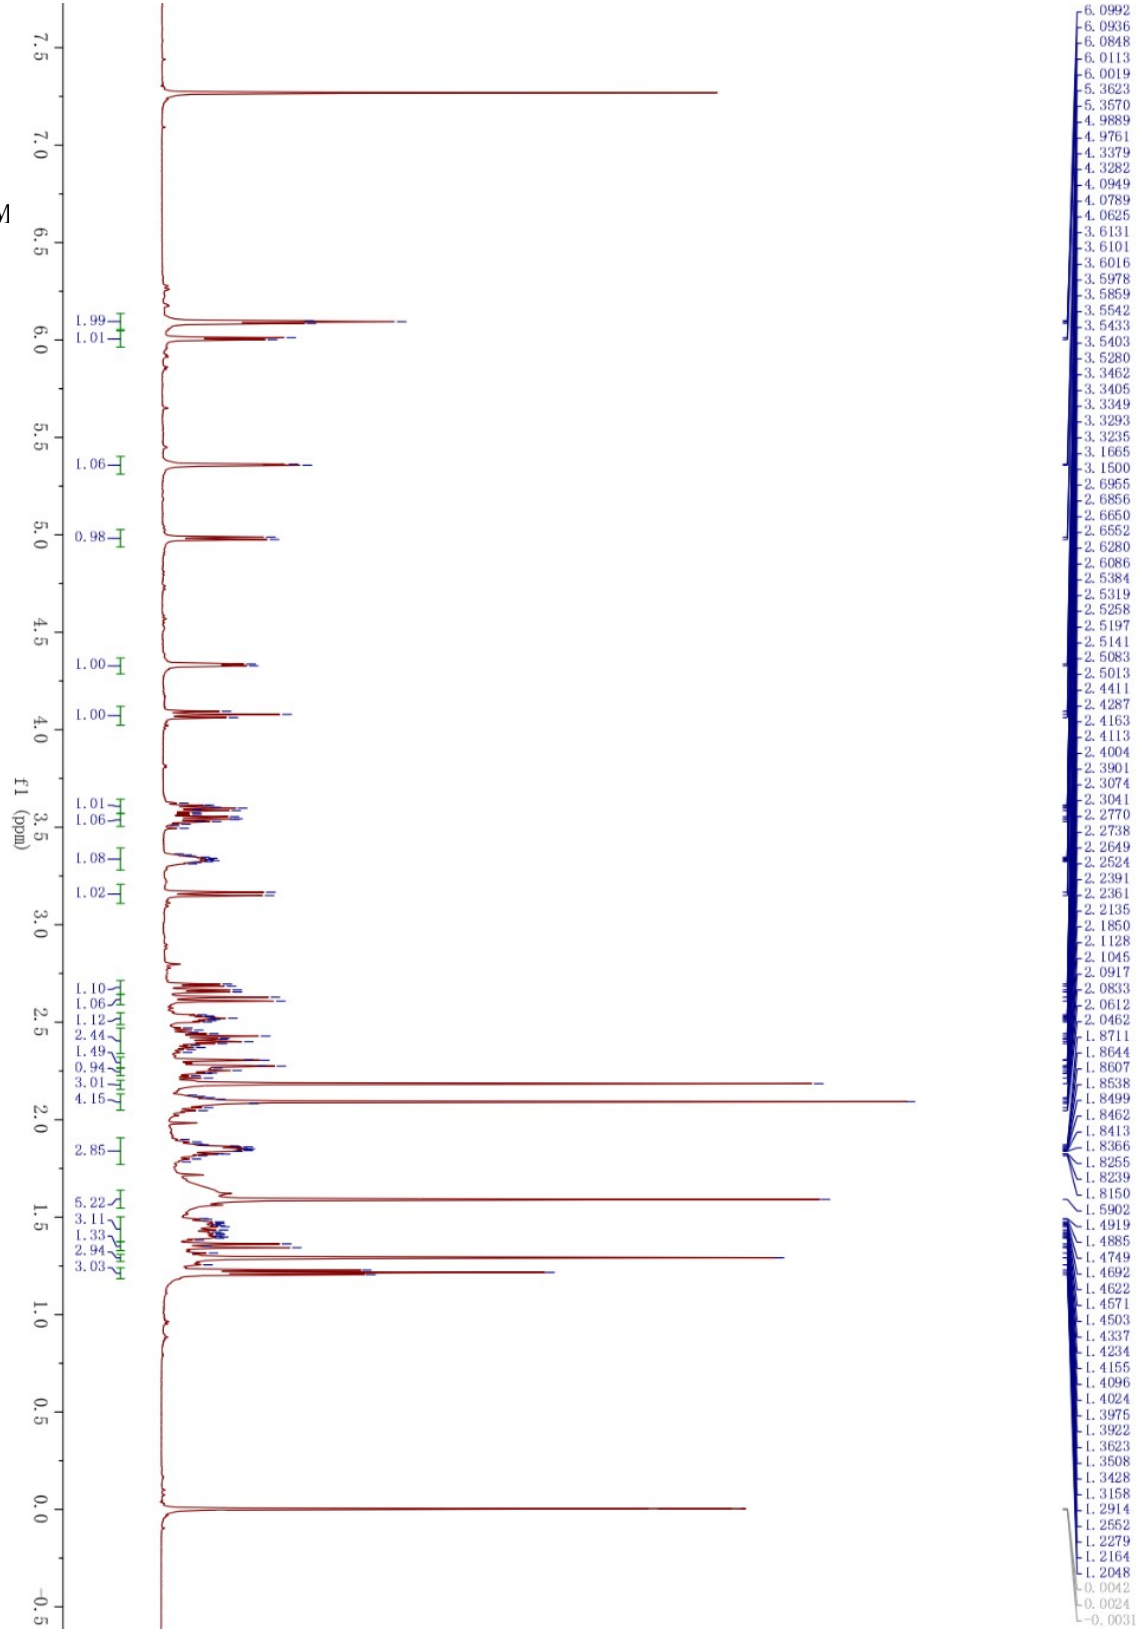



S12. <sup>13</sup>C NMR (DEPT)

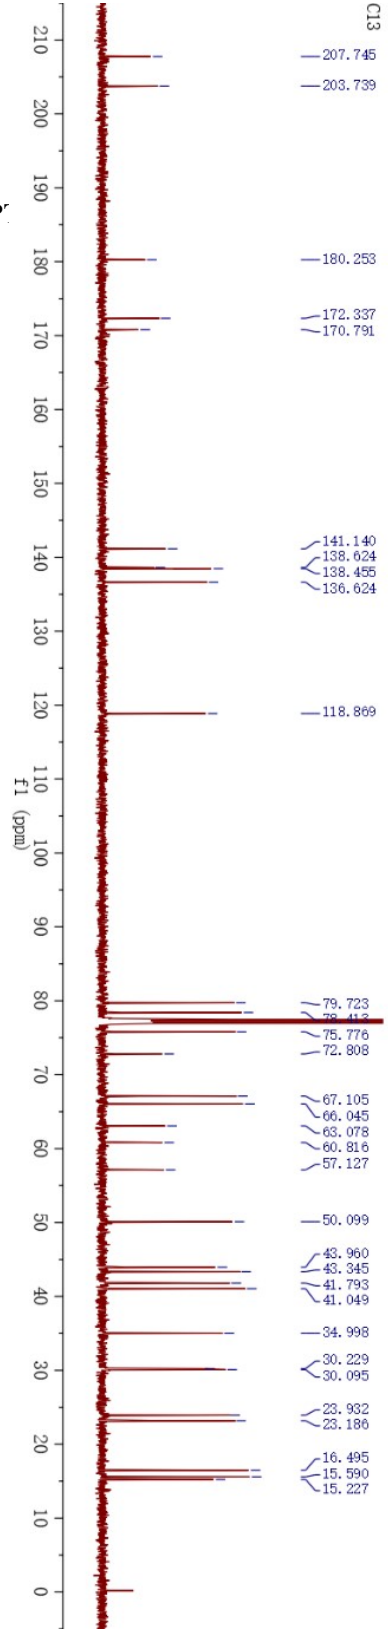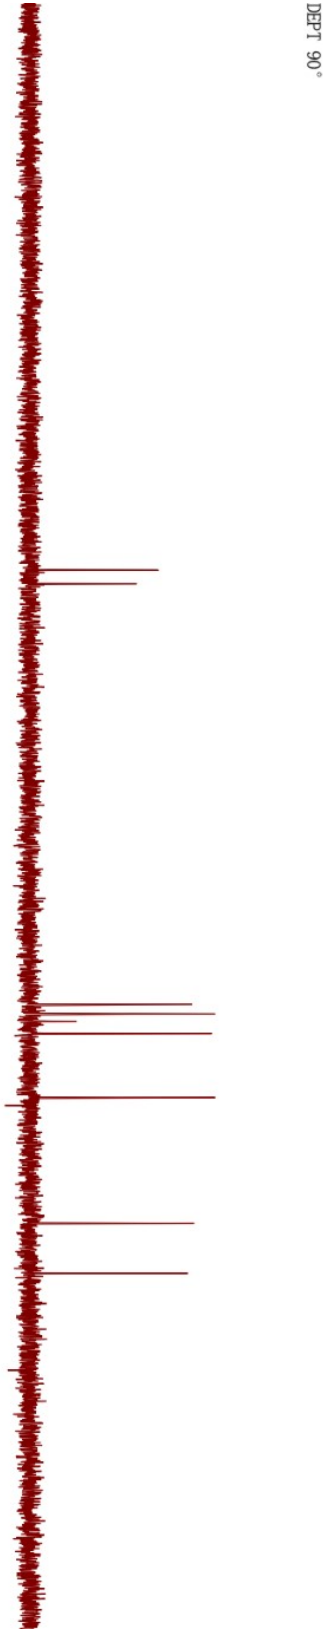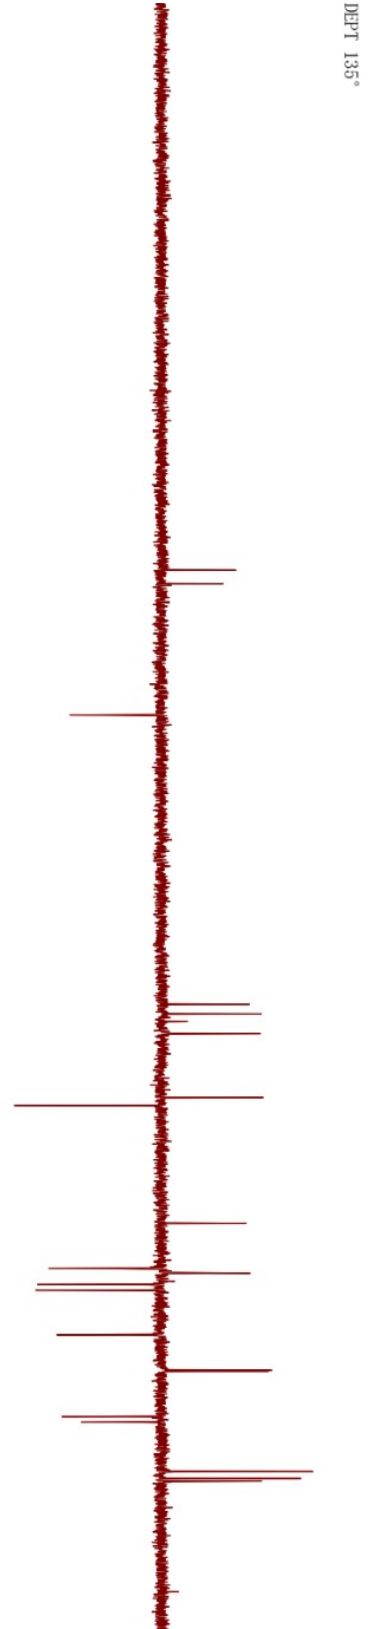

S13.  $^1\text{H}$ - $^1\text{H}$  COSY sp

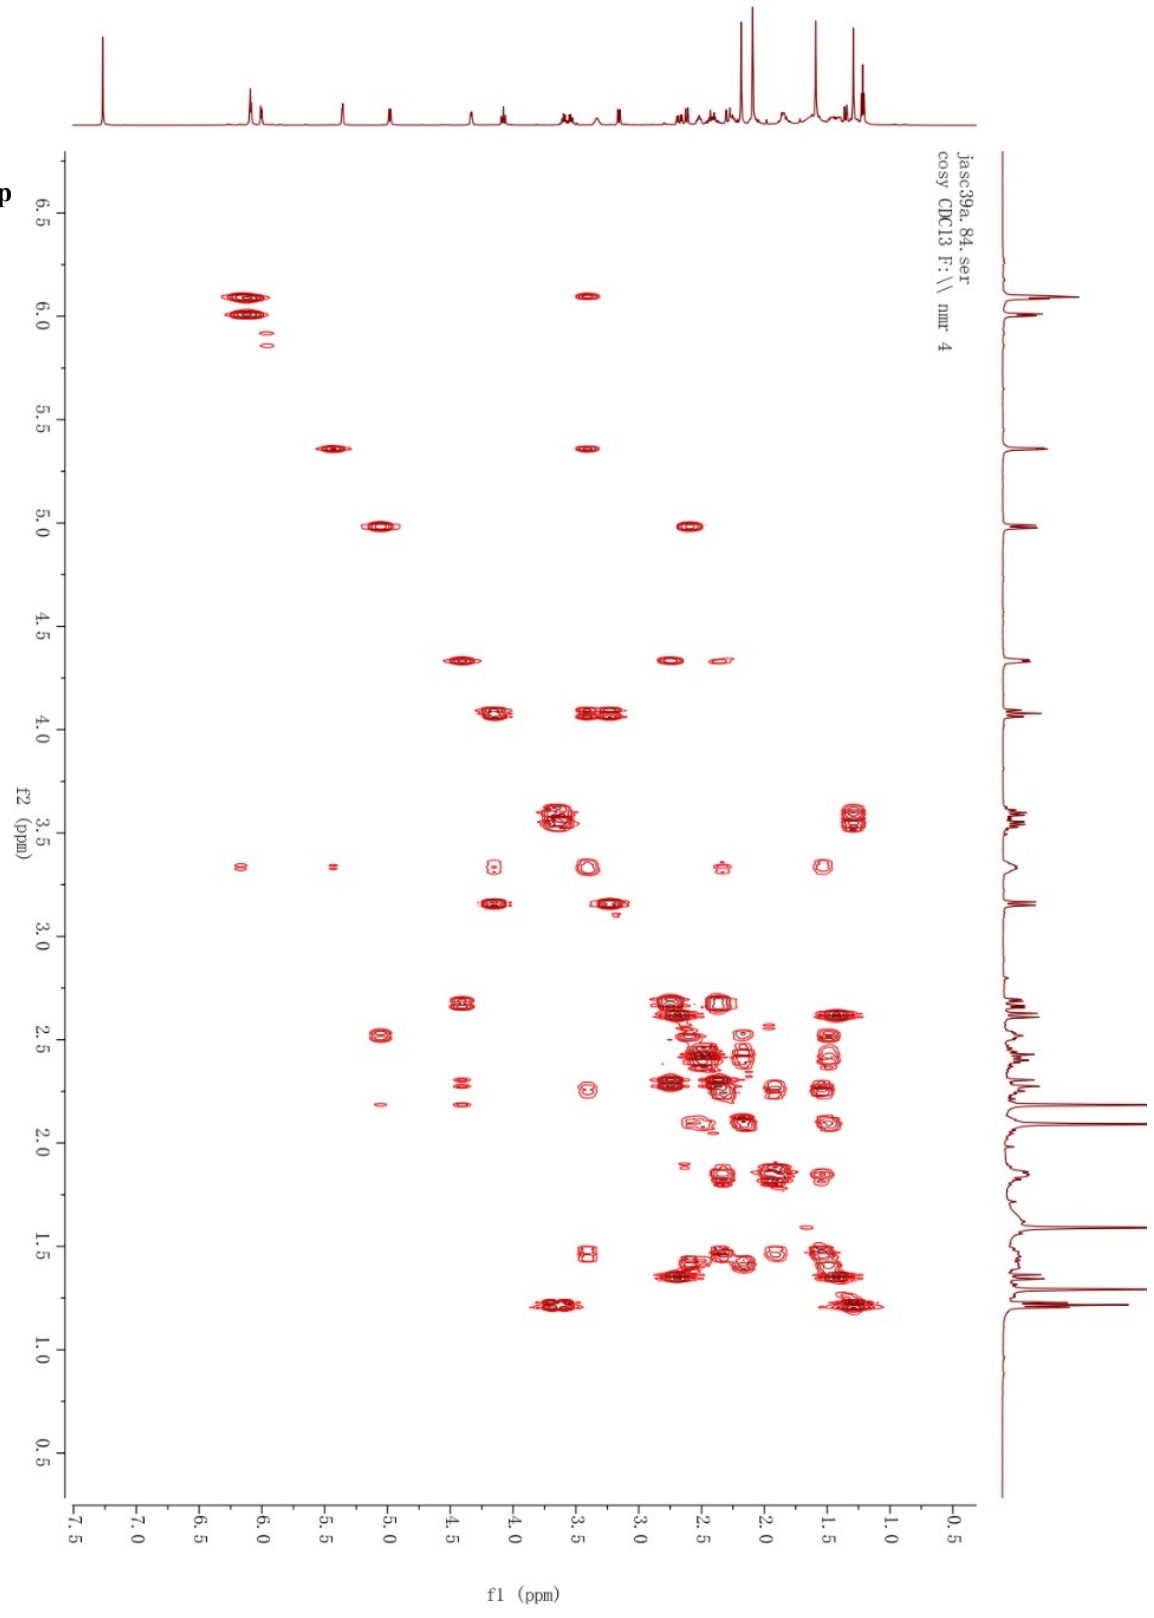

S14. HSQC spectrum

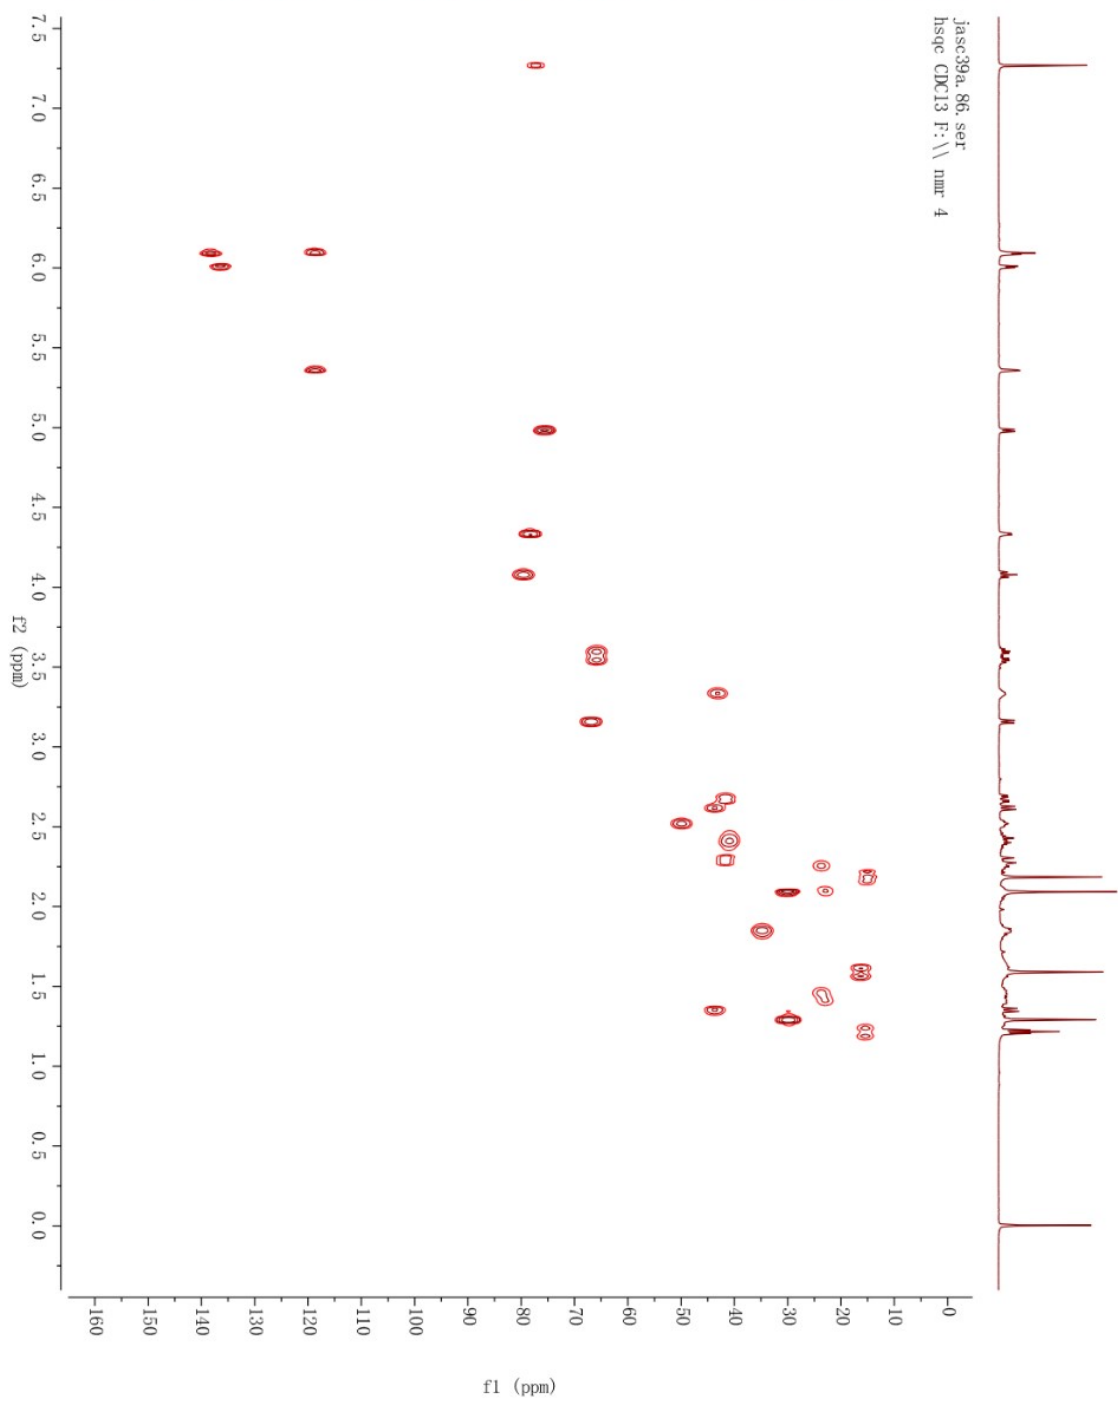

S15. HMBC spectrum

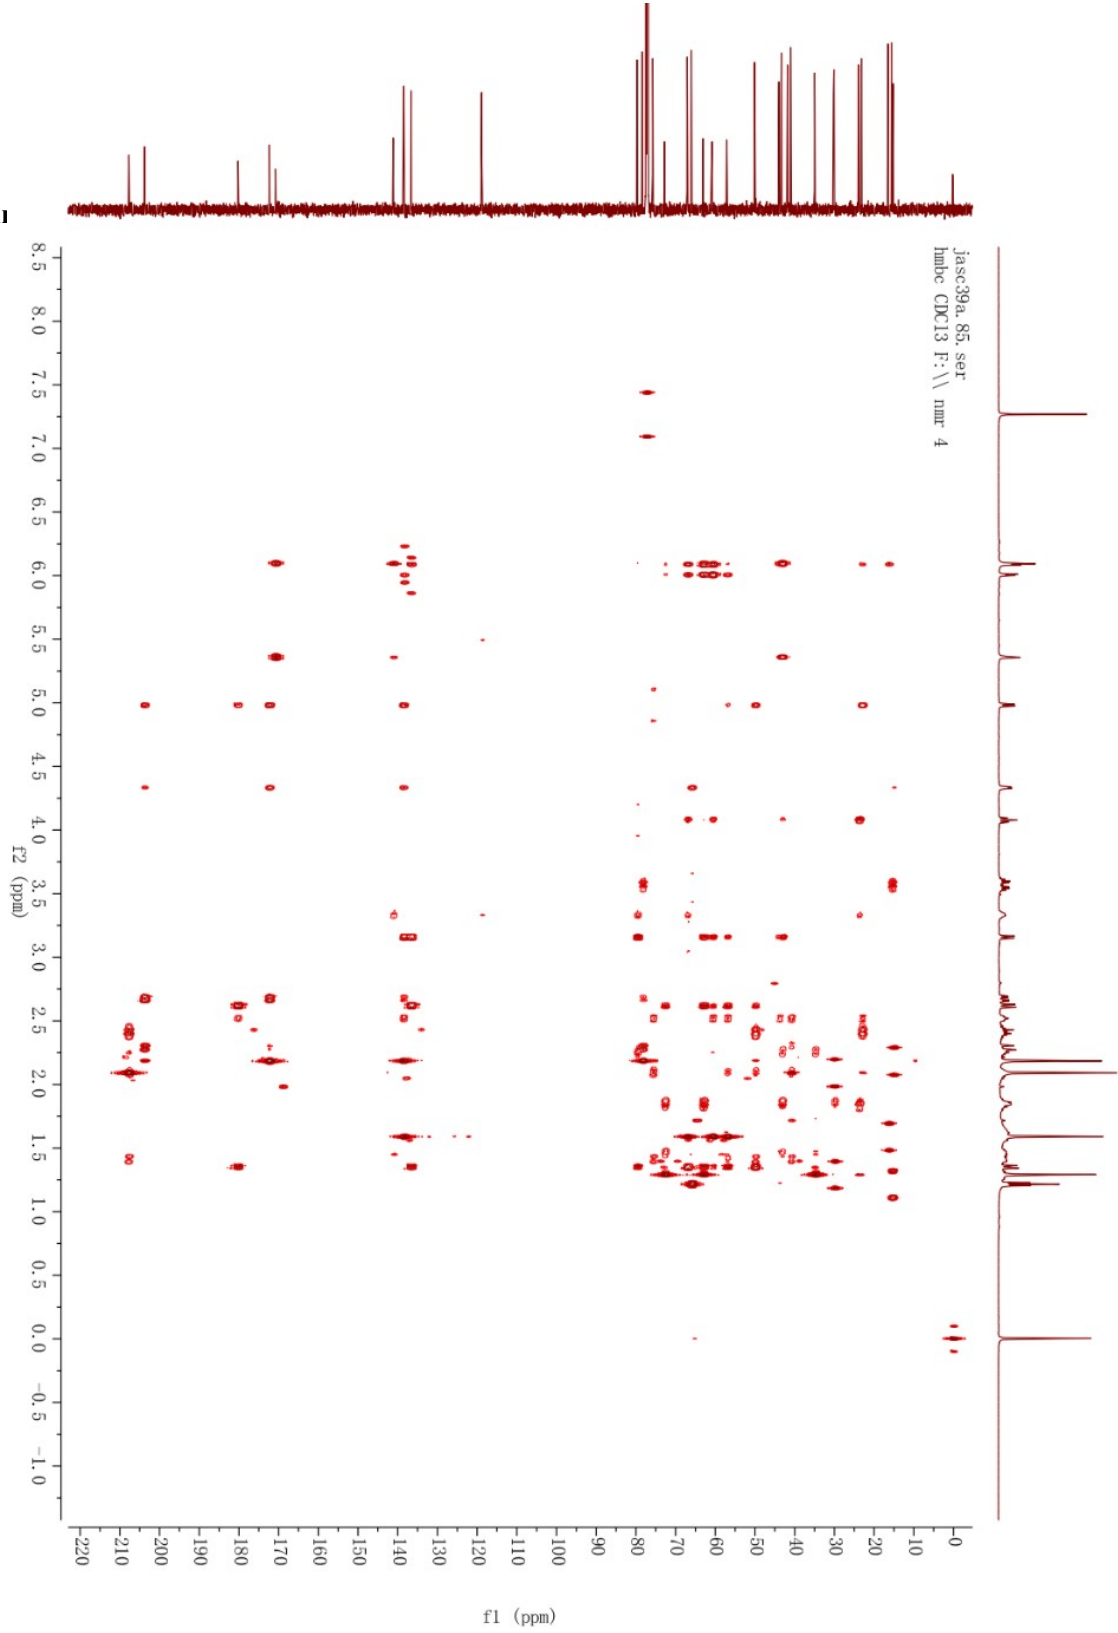

S16. ROESY spectrum

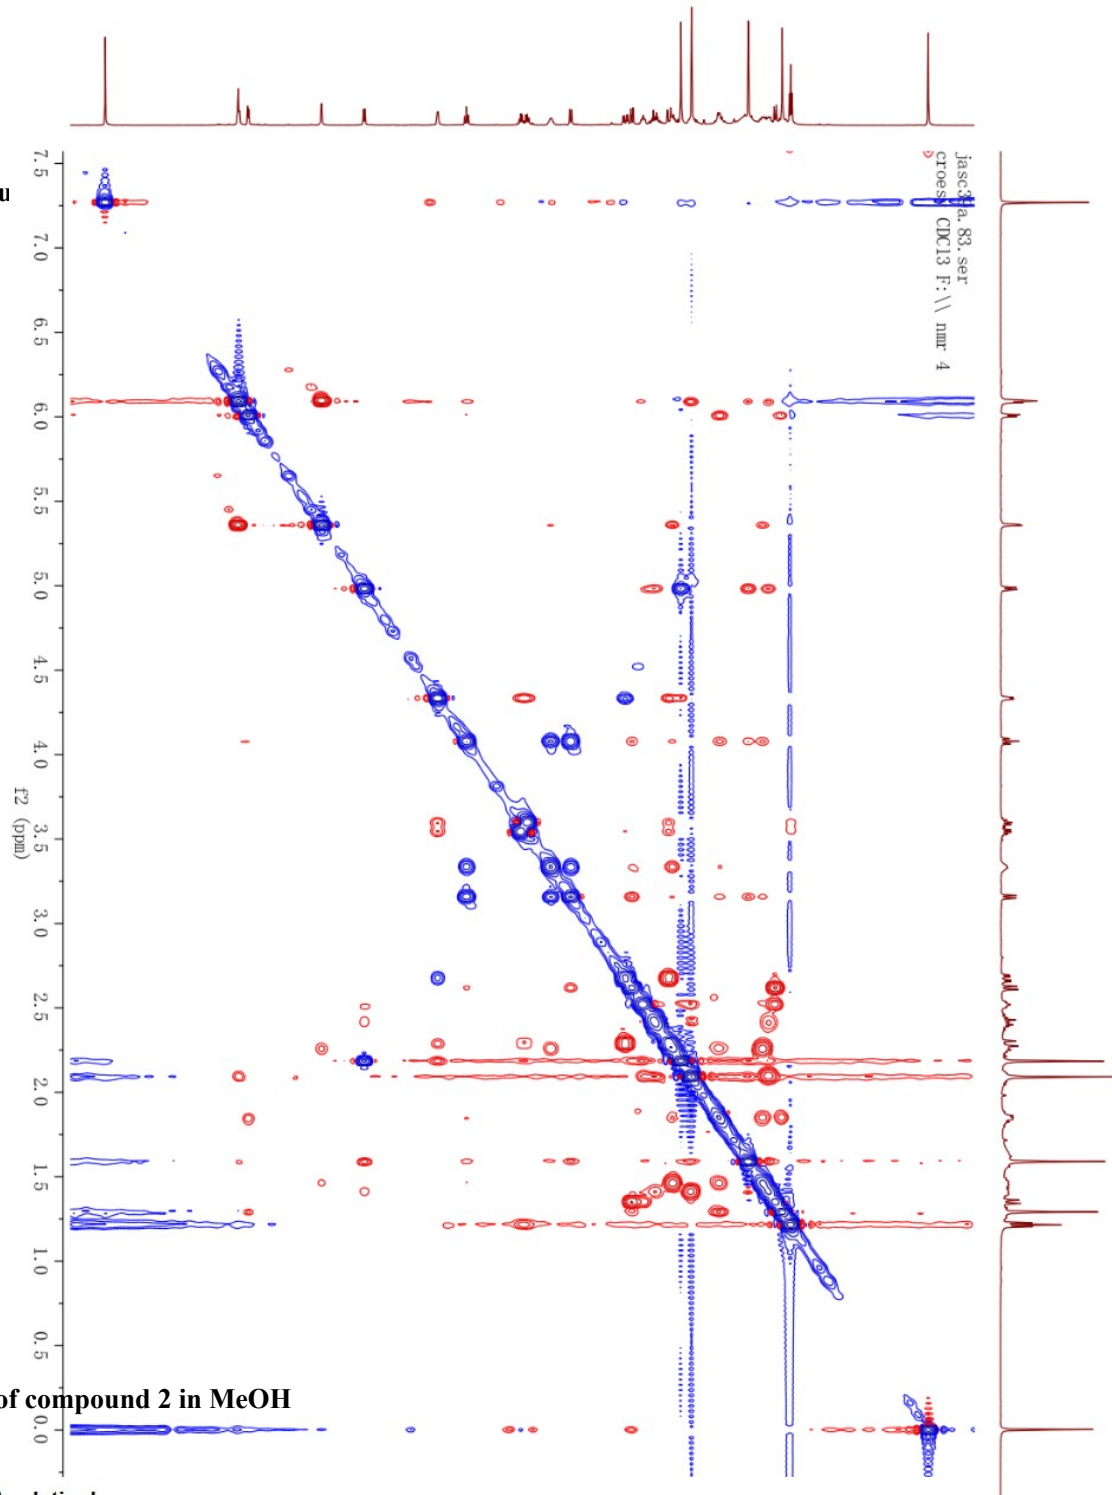

S17.  $[\alpha]_D$  spectrum of compound 2 in MeOH

**Rudolph Research Analytical**

This sample was measured on an Autopol VI, Serial #91058  
 Manufactured by Rudolph Research Analytical, Hackettstown, NJ, USA.

Measurement Date : Wednesday, 11-DEC-2024

Set Temperature : 20.0

Time Delay : Disabled

Delay between Measurement : Disabled

| n | Average | Std.Dev. | % RSD | Maximum | Minimum |
|---|---------|----------|-------|---------|---------|
| 5 | -23.36  | 0.42     | -1.79 | -22.90  | -23.66  |

| S.No | Sample ID | Time        | Result | Scale | OR °Arc | WLG.nm | Lg.mm  | Conc.g/100ml | Temp. |
|------|-----------|-------------|--------|-------|---------|--------|--------|--------------|-------|
| 1    | JASC-39   | 03:35:24 PM | -23.66 | SR    | -0.031  | 589    | 100.00 | 0.131        | 20.0  |
| 2    | JASC-39   | 03:35:30 PM | -22.90 | SR    | -0.030  | 589    | 100.00 | 0.131        | 20.0  |
| 3    | JASC-39   | 03:35:37 PM | -23.66 | SR    | -0.031  | 589    | 100.00 | 0.131        | 20.0  |
| 4    | JASC-39   | 03:35:43 PM | -22.90 | SR    | -0.030  | 589    | 100.00 | 0.131        | 20.0  |
| 5    | JASC-39   | 03:35:50 PM | -23.66 | SR    | -0.031  | 589    | 100.00 | 0.131        | 20.0  |

### S18. IR spectrum of compound 2

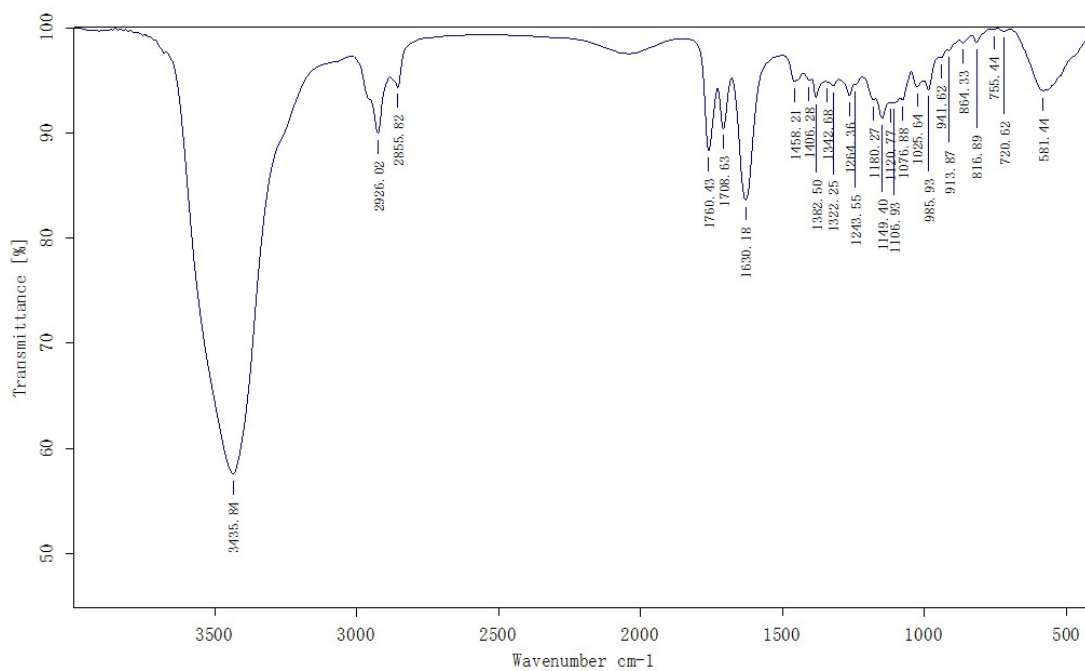

Sample Name: jasc-39  
Sample Form: KBr  
Path of File: E:\data  
Date of Measurement: 2024/12/31

Resolution: 4  
Aperture Setting: 6 mm  
Number of Background Scans: 16  
Number of Sample Scans: 16

Beamsplitter Setting: KBr  
Source Setting: MIR  
Instrument Type: BRUKER VERTEX 70  
Soft Version: OPUS.1

### S19. ECD and UV spectra of compound 2

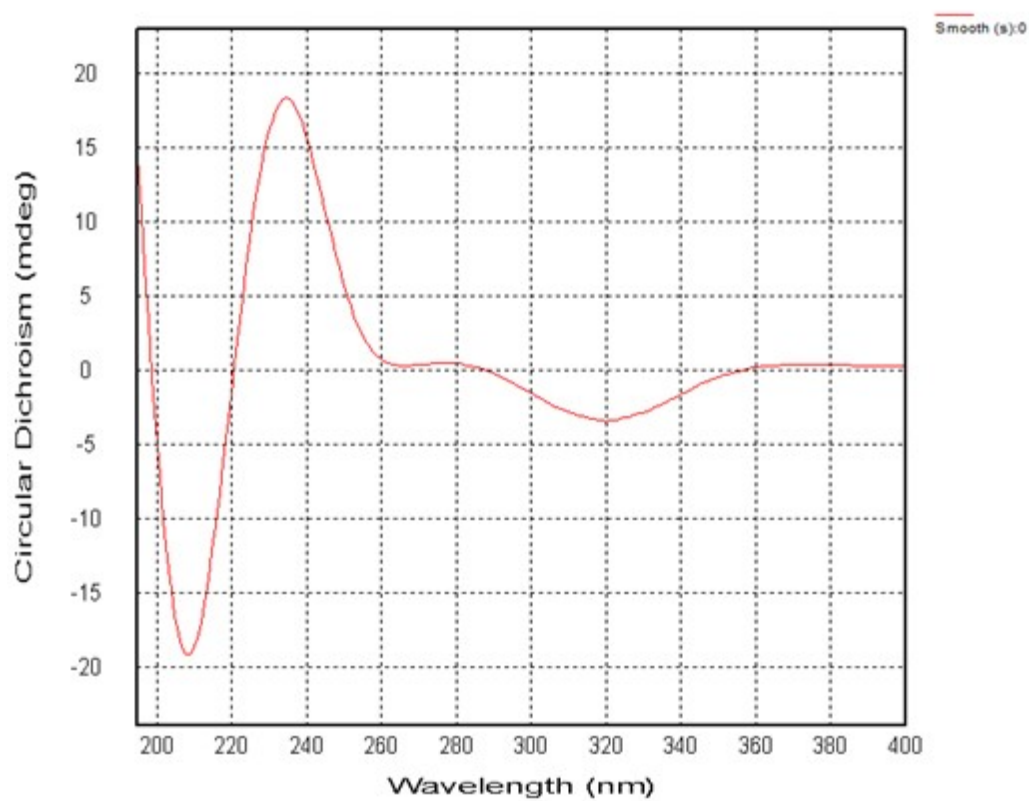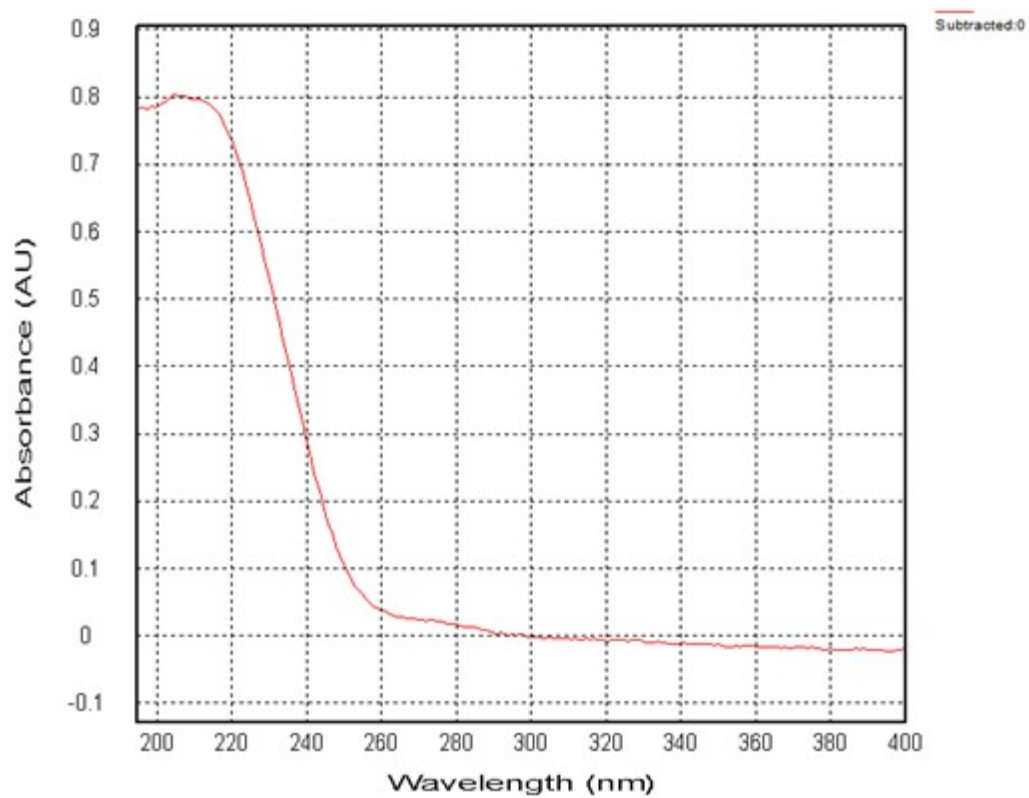

## S20. HRESIMS of compound 2

| Elmt | Val. | Min | Max | Elmt | Val. | Min | Max | Use Adduct |
|------|------|-----|-----|------|------|-----|-----|------------|
| H    | 1    | 0   | 300 | O    | 2    | 0   | 20  | H          |
| C    | 4    | 0   | 150 | Cl   | 1    | 0   | 0   | Na         |
| N    | 3    | 0   | 1   |      |      |     |     |            |

Error Margin (ppm): 100  
 HC Ratio: unlimited  
 Max Isotopes: all  
 MSn Iso RI (%): 75.00

DBE Range: -2.0 - 1000.0  
 Apply N Rule: yes  
 Isotope RI (%): 1.00  
 MSn Logic Mode: AND

Electron Ions: both  
 Use MSn Info: no  
 Isotope Res: 10000  
 Max Results: 500

Event#: 1 MS(E+) Ret. Time : 14.772 Scan#: 2209

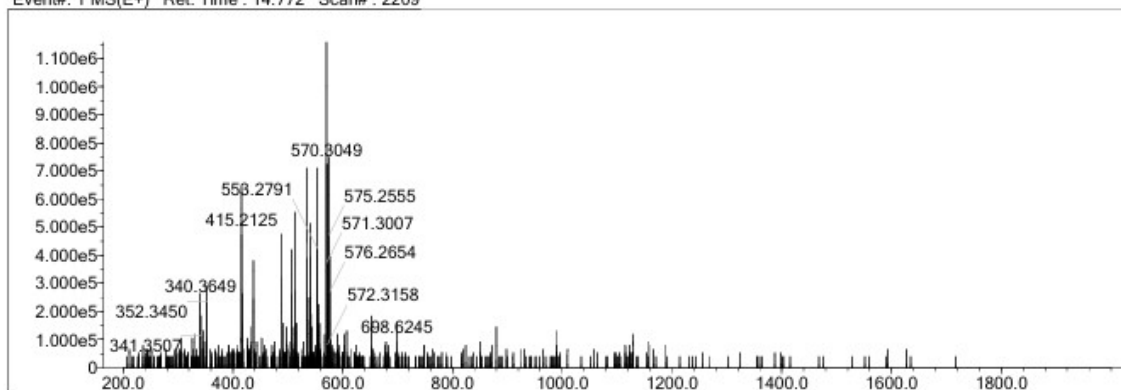

Measured region for 553.2791 m/z

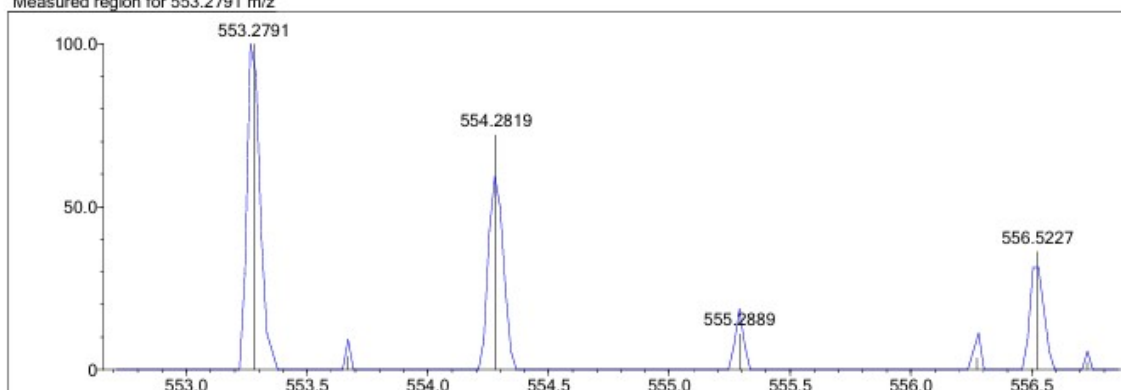

C32 H40 O8 [M+H]<sup>+</sup> : Predicted region for 553.2796 m/z

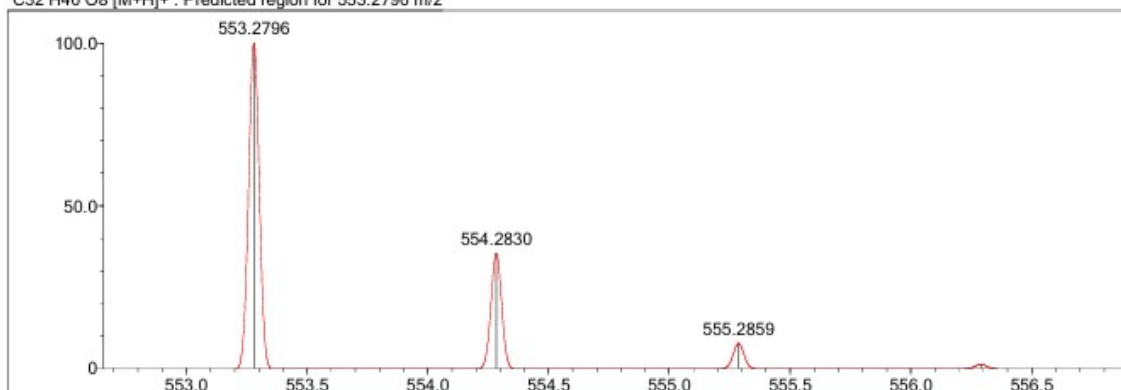

| Rank | Score | Formula (M) | Ion                | Meas. m/z | Pred. m/z | Df. (mDa) | Df. (ppm) | Iso   | DBE  |
|------|-------|-------------|--------------------|-----------|-----------|-----------|-----------|-------|------|
| 1    | 35.94 | C32 H40 O8  | [M+H] <sup>+</sup> | 553.2791  | 553.2796  | -0.5      | -0.90     | 35.94 | 13.0 |



S21. <sup>1</sup>H NMR (600 M

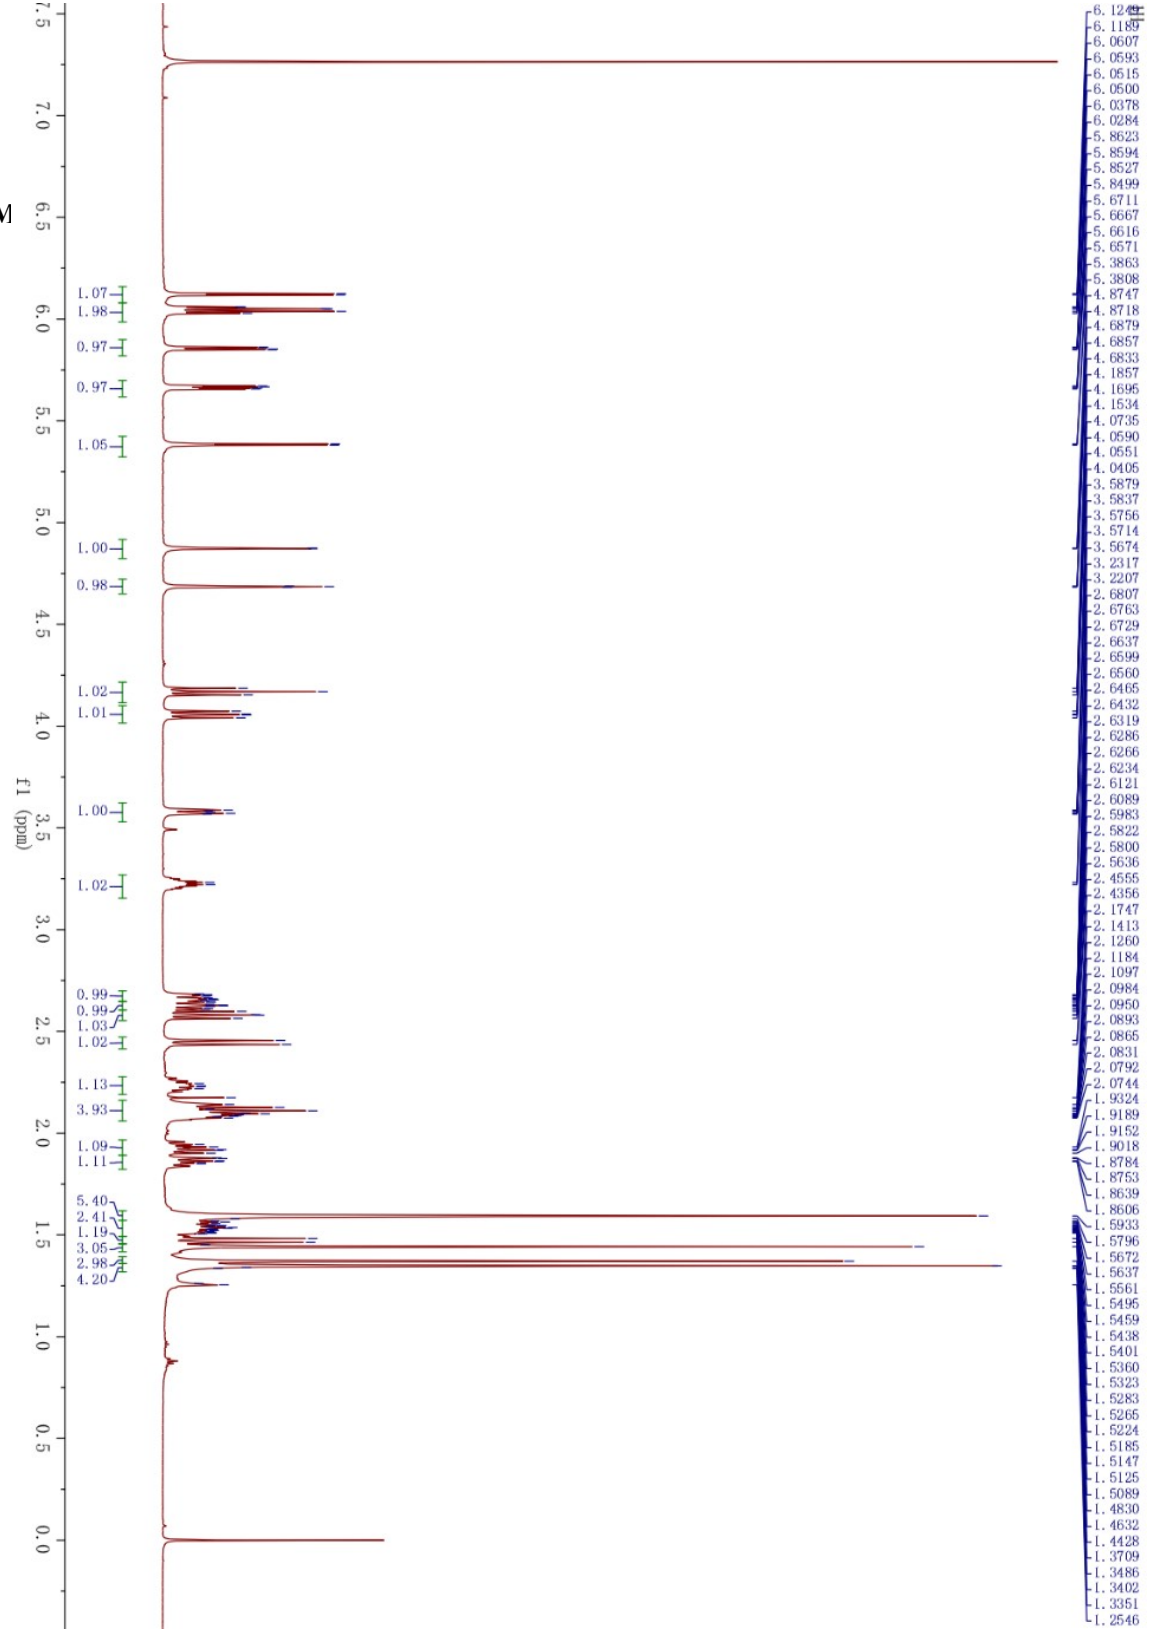

S22. <sup>13</sup>C NMR (DEPT)

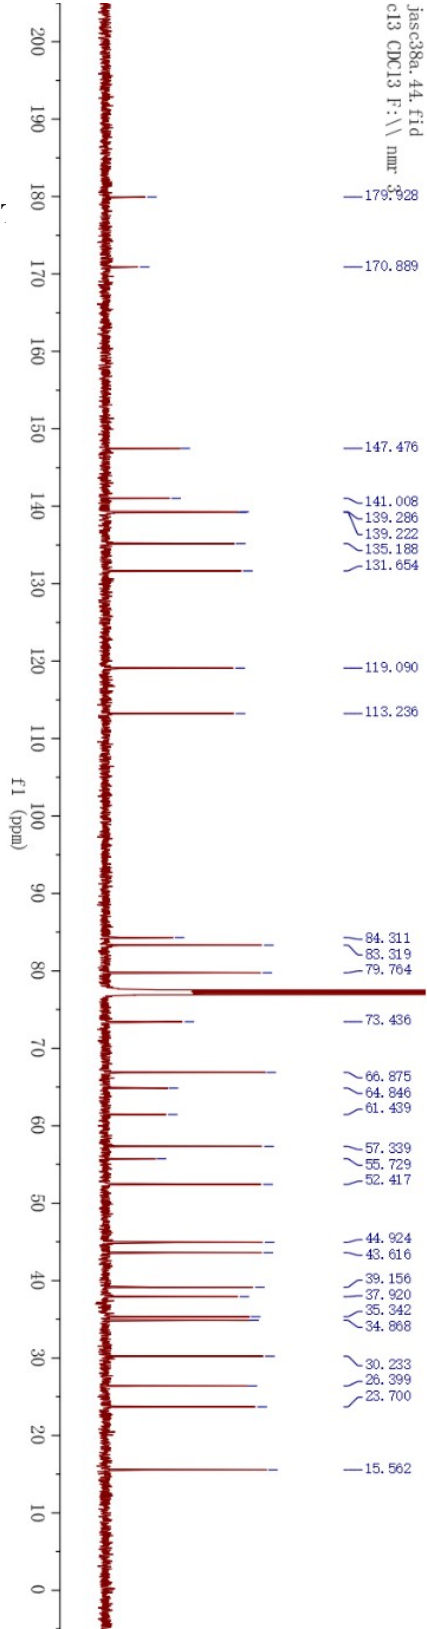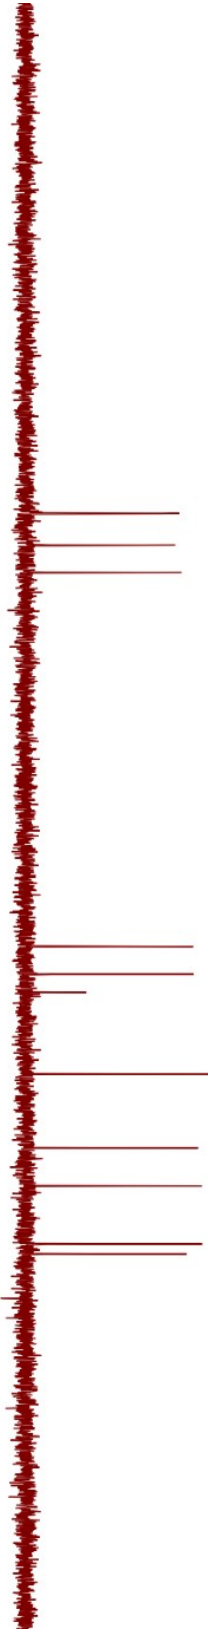

DEPT 90°

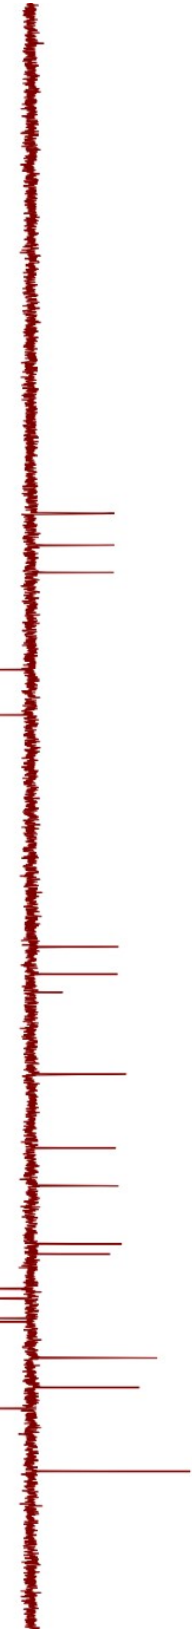

DEPT 135°

S23.  $^1\text{H}$ - $^1\text{H}$  COSY (6)

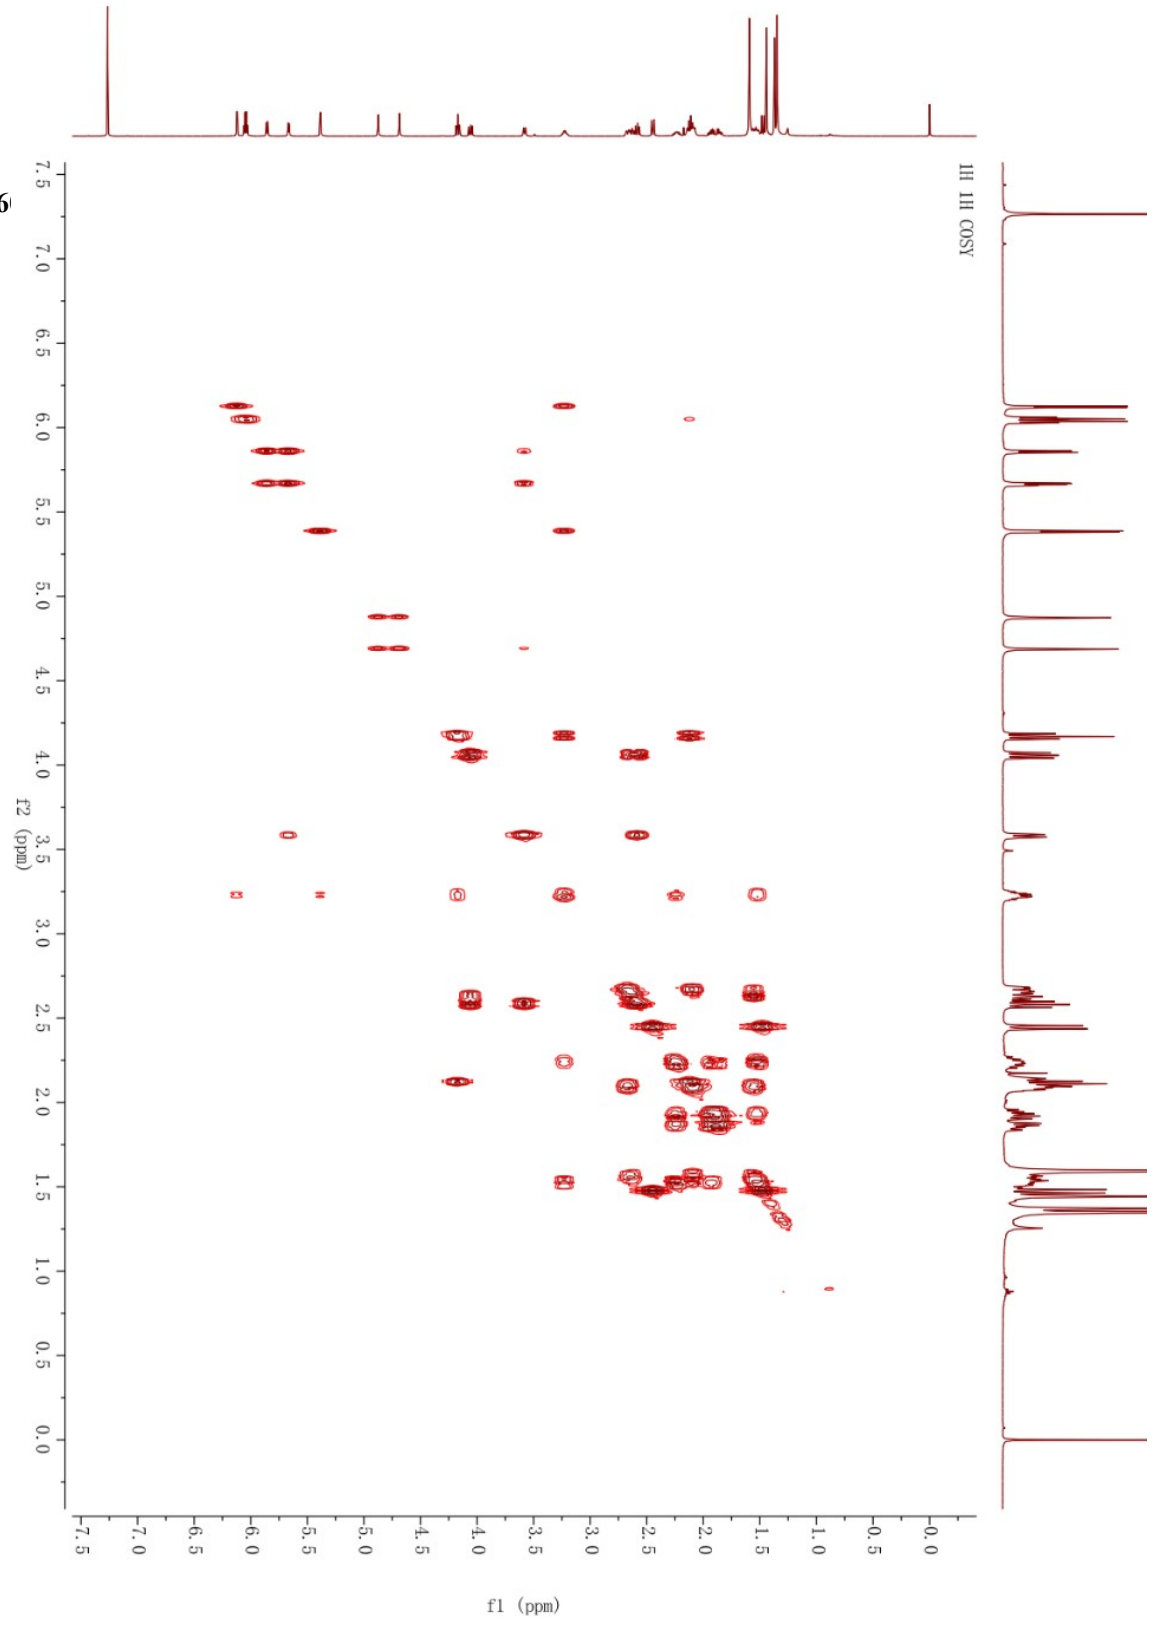

S24. HSQC spectrum

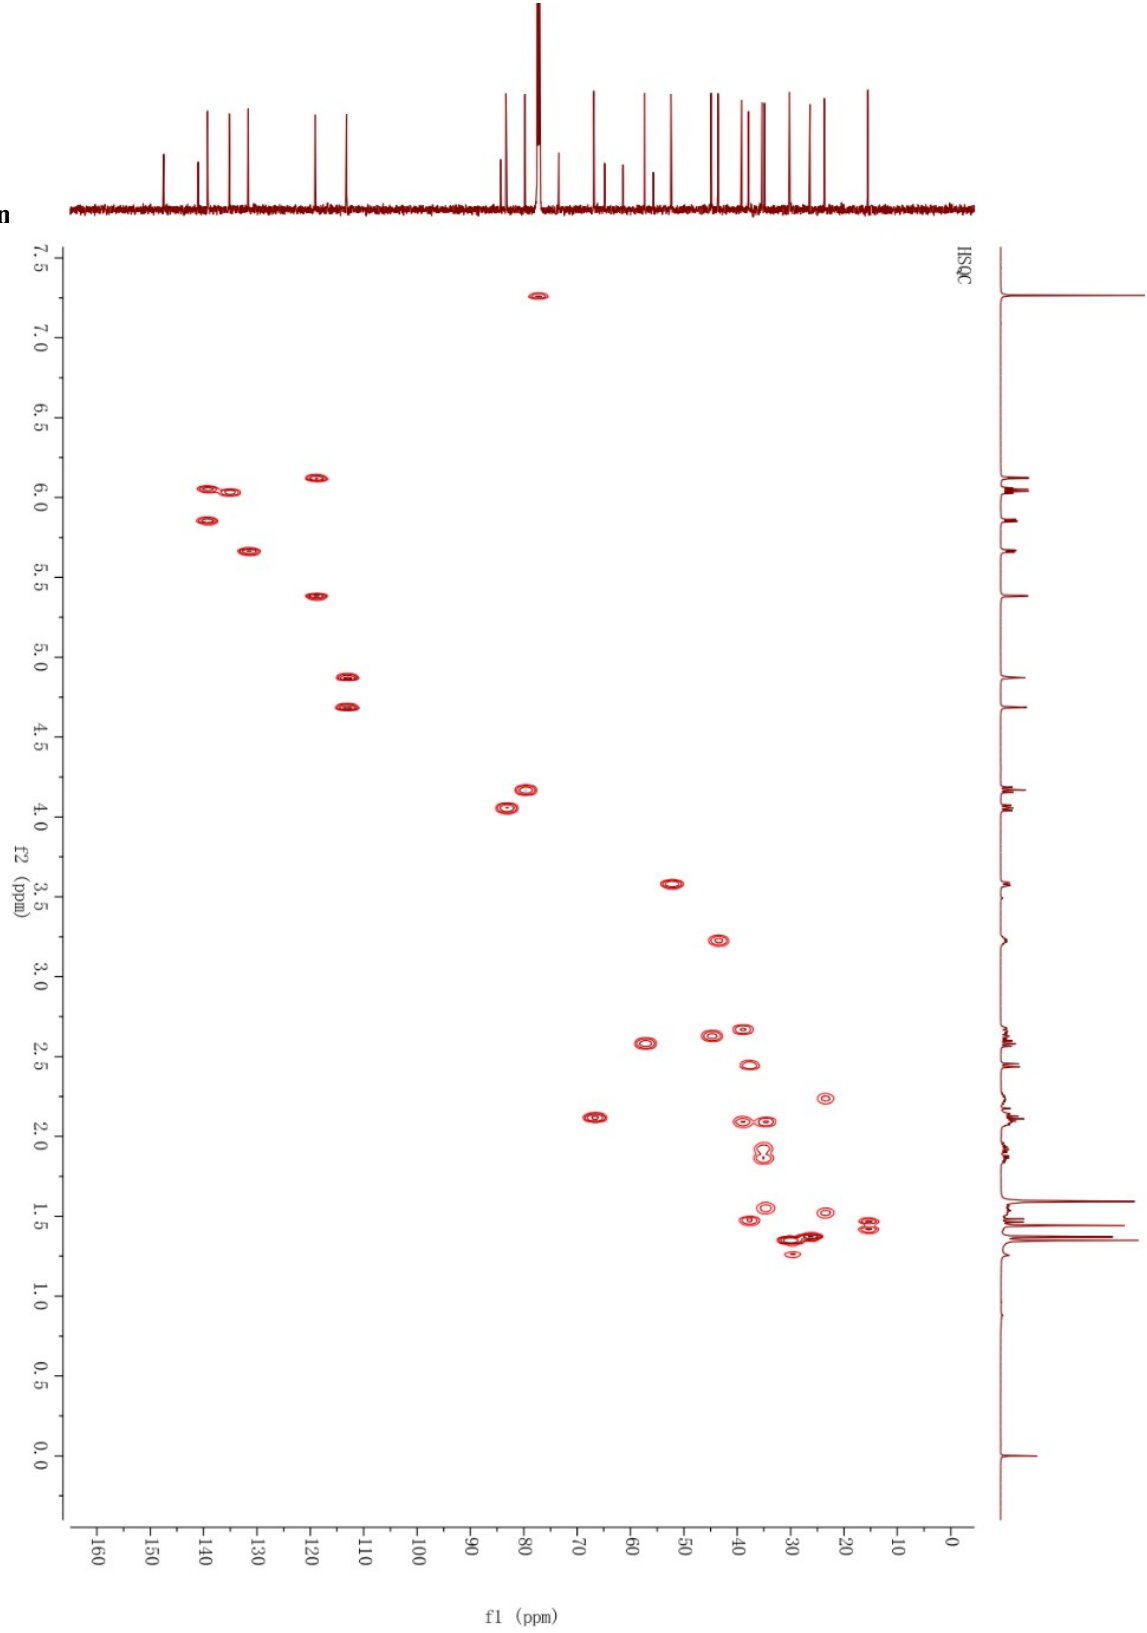

S25. HMBC spectrum

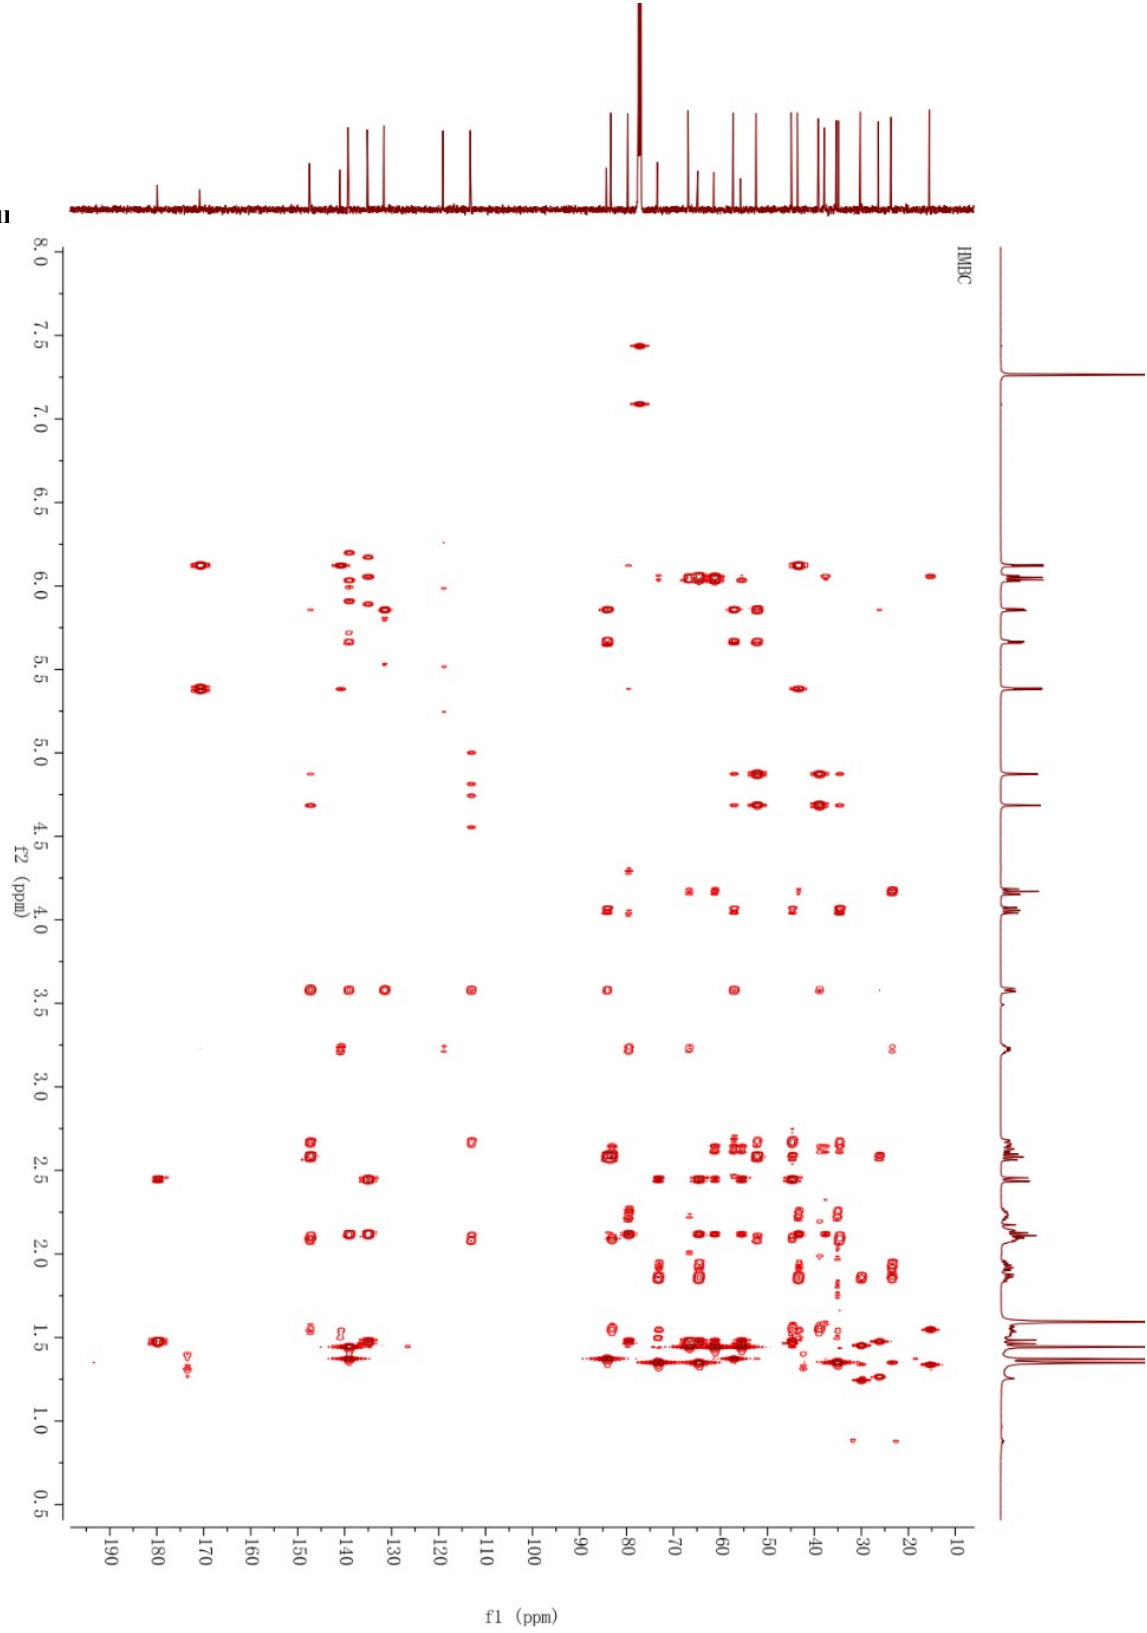

S26. ROESY spectrum

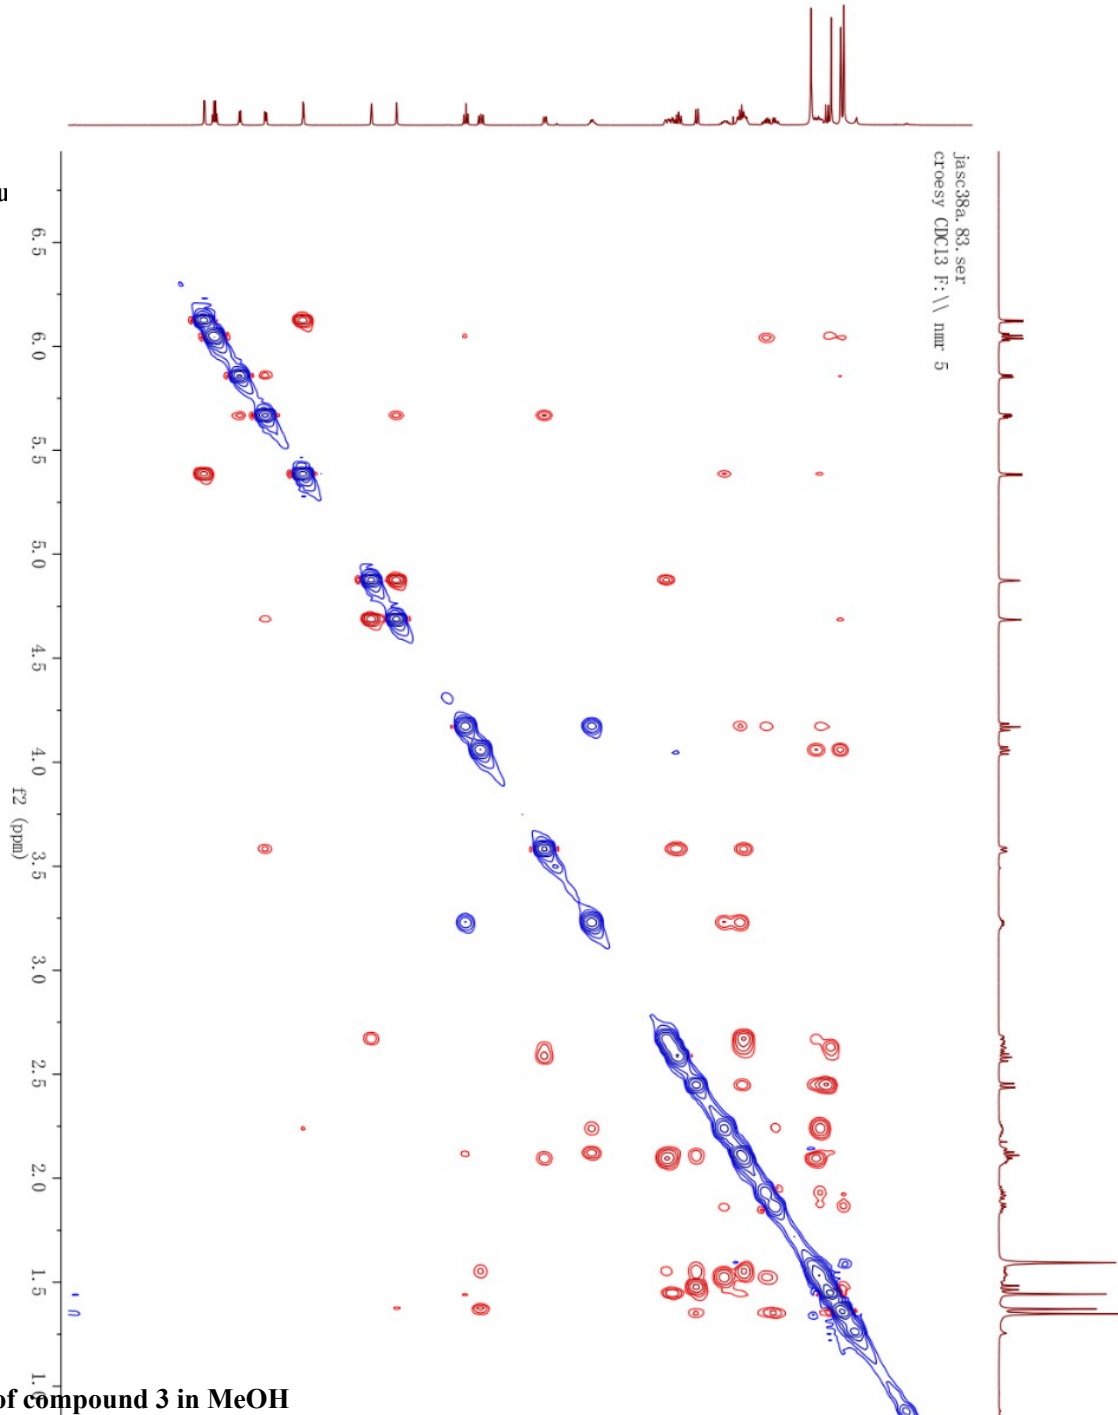

S27.  $[\alpha]_D$  spectrum of compound 3 in MeOH

**Rudolph Research Analytical**

This sample was measured on an Autopol VI, Serial #91058  
 Manufactured by Rudolph Research Analytical, Hackettstown, NJ, USA  
 Measurement Date : Wednesday, 11-DEC-2024  
 Set Temperature : 20.0  
 Time Delay : Disabled  
 Delay between Measurement : Disabled

| n    | Average   | Std.Dev.    | % RSD  | Maximum | Minimum |        |        |              |       |
|------|-----------|-------------|--------|---------|---------|--------|--------|--------------|-------|
| 5    | -84.16    | 0.76        | -0.90  | -83.33  | -84.72  |        |        |              |       |
| S.No | Sample ID | Time        | Result | Scale   | OR °Arc | WLG.nm | Lg.mm  | Conc.g/100ml | Temp. |
| 1    | JASC-38   | 03:29:31 PM | -83.33 | SR      | -0.060  | 589    | 100.00 | 0.072        | 20.0  |
| 2    | JASC-38   | 03:29:38 PM | -83.33 | SR      | -0.060  | 589    | 100.00 | 0.072        | 20.0  |
| 3    | JASC-38   | 03:29:44 PM | -84.72 | SR      | -0.061  | 589    | 100.00 | 0.072        | 20.0  |
| 4    | JASC-38   | 03:29:50 PM | -84.72 | SR      | -0.061  | 589    | 100.00 | 0.072        | 20.0  |
| 5    | JASC-38   | 03:29:57 PM | -84.72 | SR      | -0.061  | 589    | 100.00 | 0.072        | 20.0  |

### S28. IR spectrum of compound 3

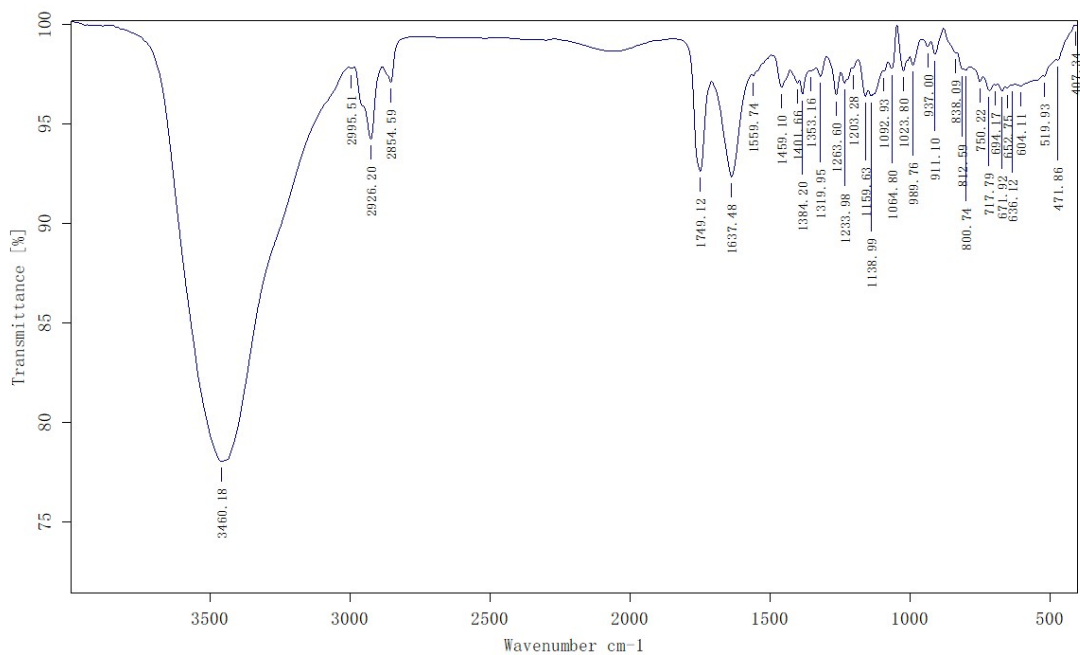

Sample Name: jasc-38  
Sample Form: KBr  
Path of File: E:\data  
Date of Measurement: 2024/12/31

Resolution: 4  
Aperture Setting: 6 mm  
Number of Background Scans: 16  
Number of Sample Scans: 16

Beamsplitter Setting: KBr  
Source Setting: MIR  
Instrument Type: BRUKER VERTEX 70  
Soft Version: OPUS8.1

### S29. ECD and UV spectra of compound 3

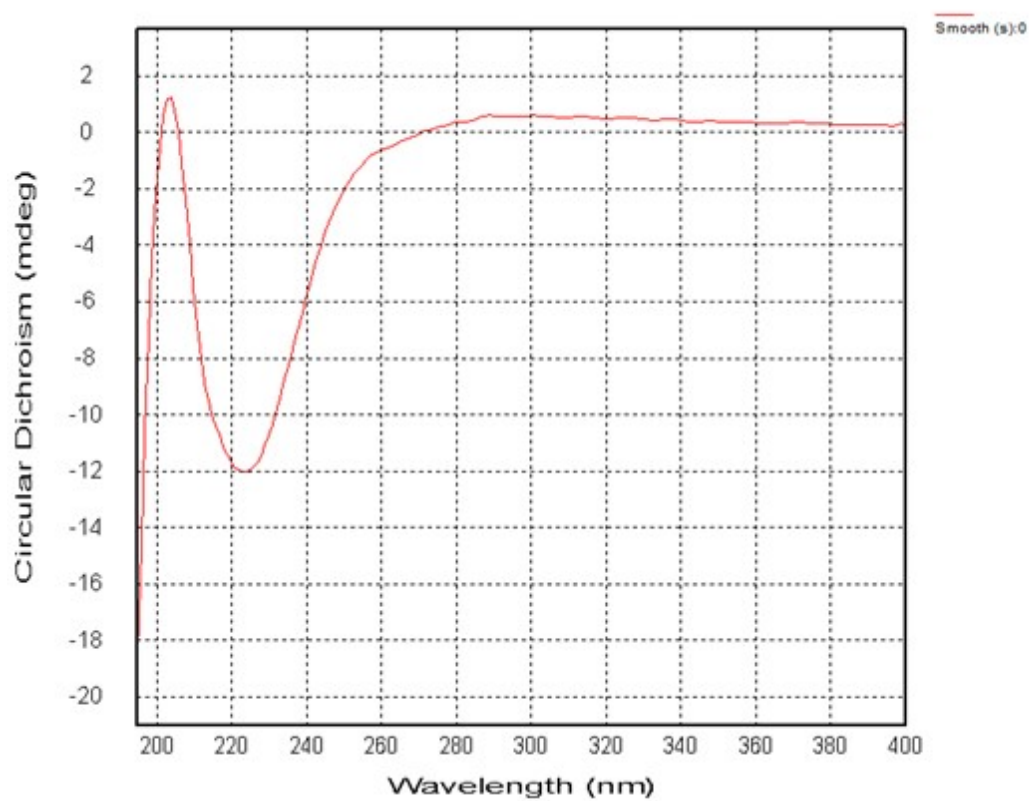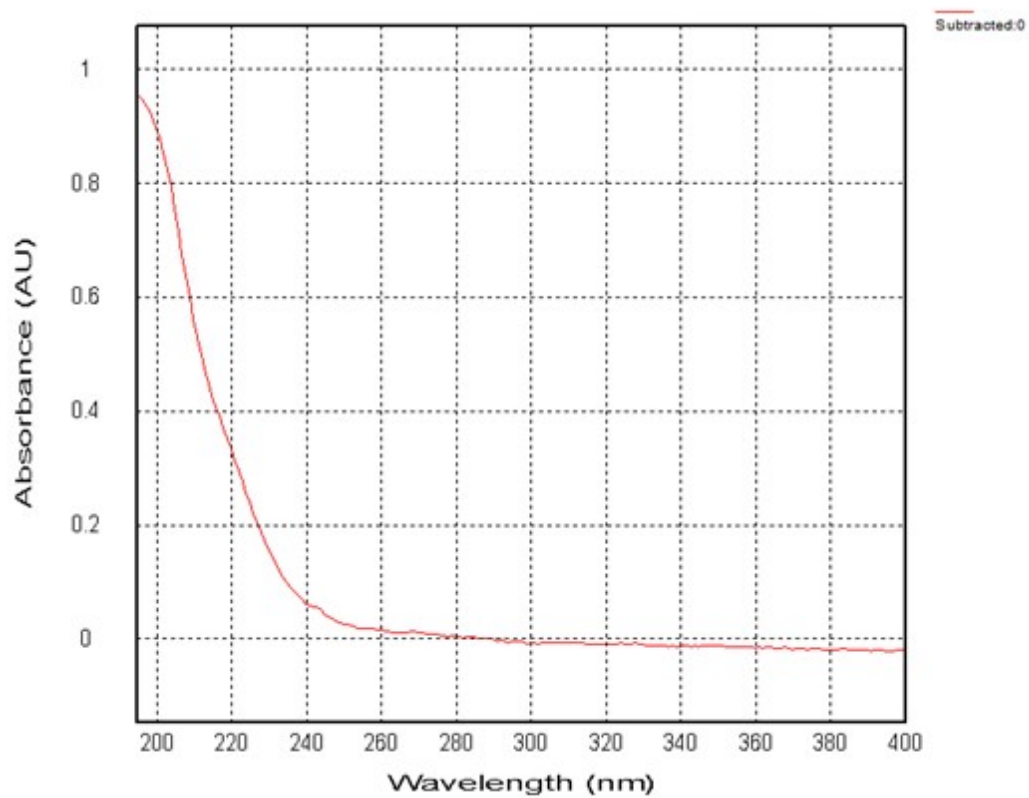



### S30. HRESIMS of compound 3

| Elmt | Val. | Min | Max | Elmt | Val. | Min | Max | Use Adduct |
|------|------|-----|-----|------|------|-----|-----|------------|
| H    | 1    | 0   | 300 | O    | 2    | 0   | 20  | H          |
| C    | 4    | 0   | 150 | Cl   | 1    | 0   | 0   | Na         |
| N    | 3    | 0   | 1   |      |      |     |     |            |

Error Margin (ppm): 100  
 HC Ratio: unlimited  
 Max Isotopes: all  
 MSn Iso RI (%): 75.00

DBE Range: -2.0 - 1000.0  
 Apply N Rule: yes  
 Isotope RI (%): 1.00  
 MSn Logic Mode: AND

Electron Ions: both  
 Use MSn Info: no  
 Isotope Res: 10000  
 Max Results: 500

Event#: 1 MS(E+) Ret. Time : 12.960 Scan#: 1945

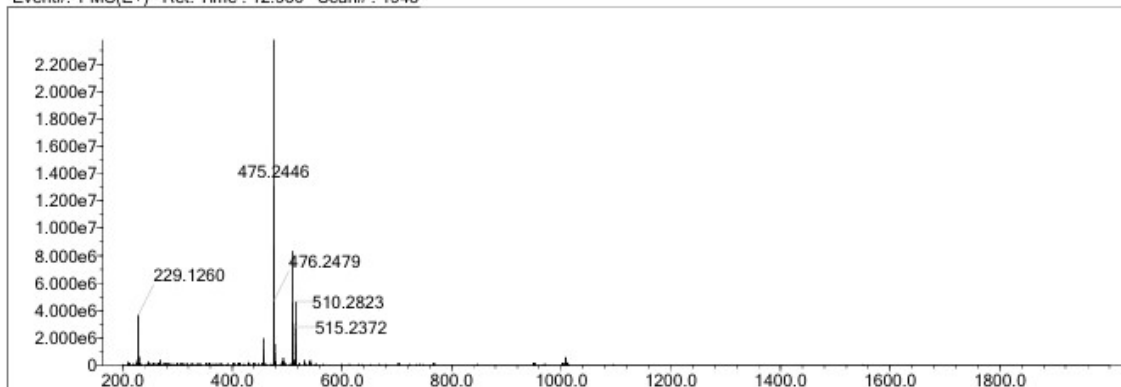

Measured region for 493.2580 m/z

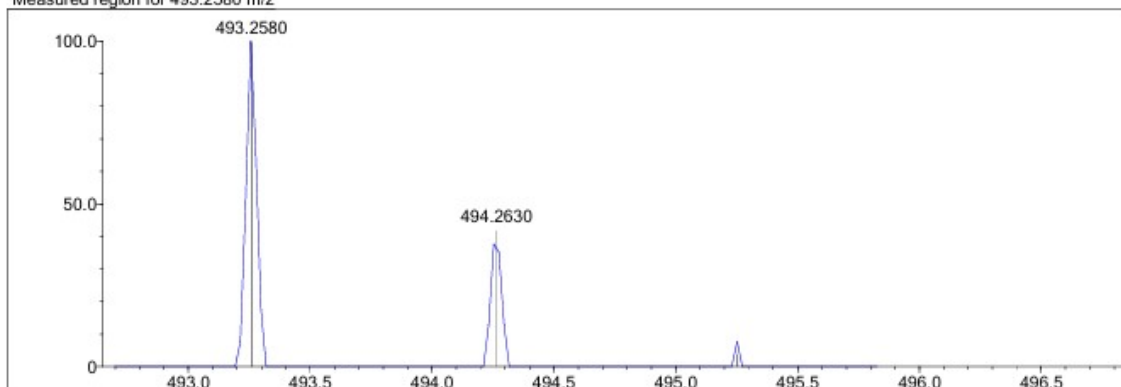

C30 H36 O6 [M+H]<sup>+</sup> : Predicted region for 493.2585 m/z

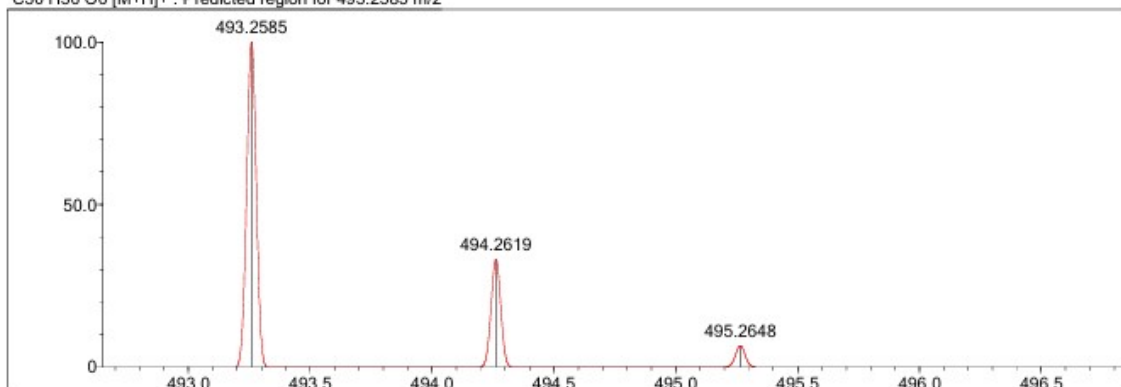

| Rank | Score | Formula (M) | Ion                | Meas. m/z | Pred. m/z | Df. (mDa) | Df. (ppm) | Iso   | DBE  |
|------|-------|-------------|--------------------|-----------|-----------|-----------|-----------|-------|------|
| 2    | 52.52 | C30 H36 O6  | [M+H] <sup>+</sup> | 493.2580  | 493.2585  | -0.5      | -1.01     | 52.53 | 13.0 |

S31. <sup>1</sup>H NMR (600 M

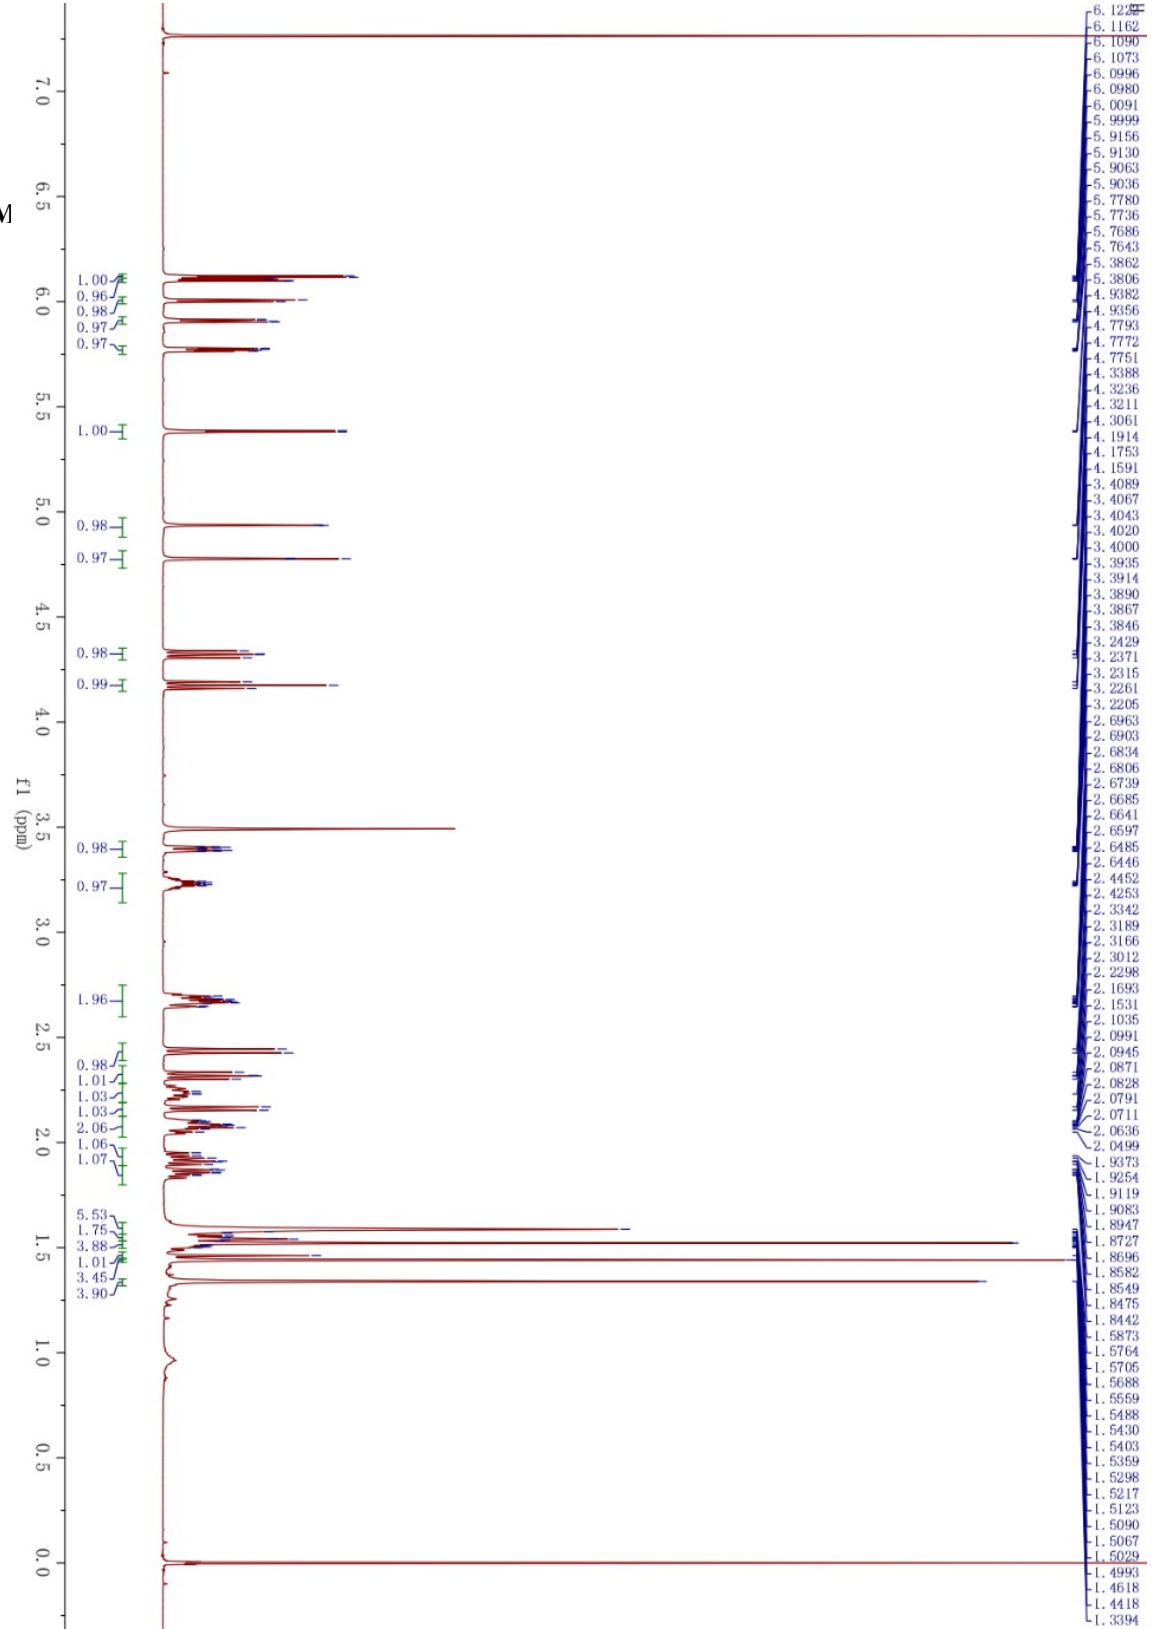

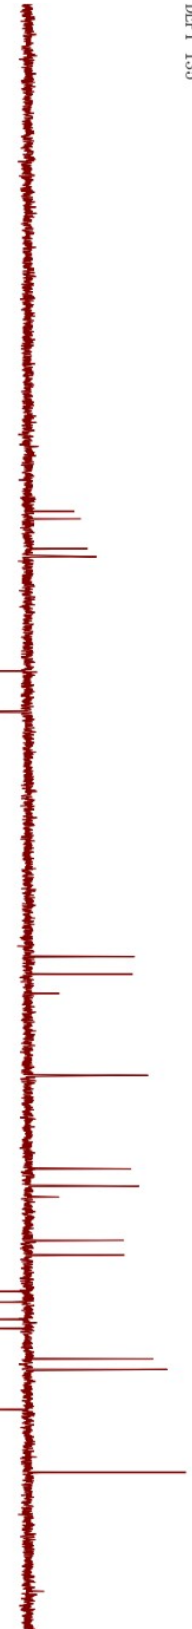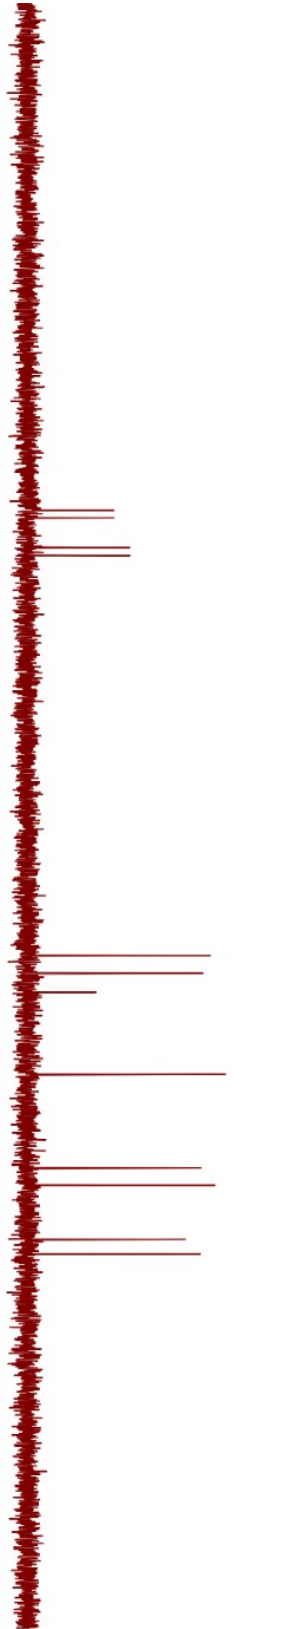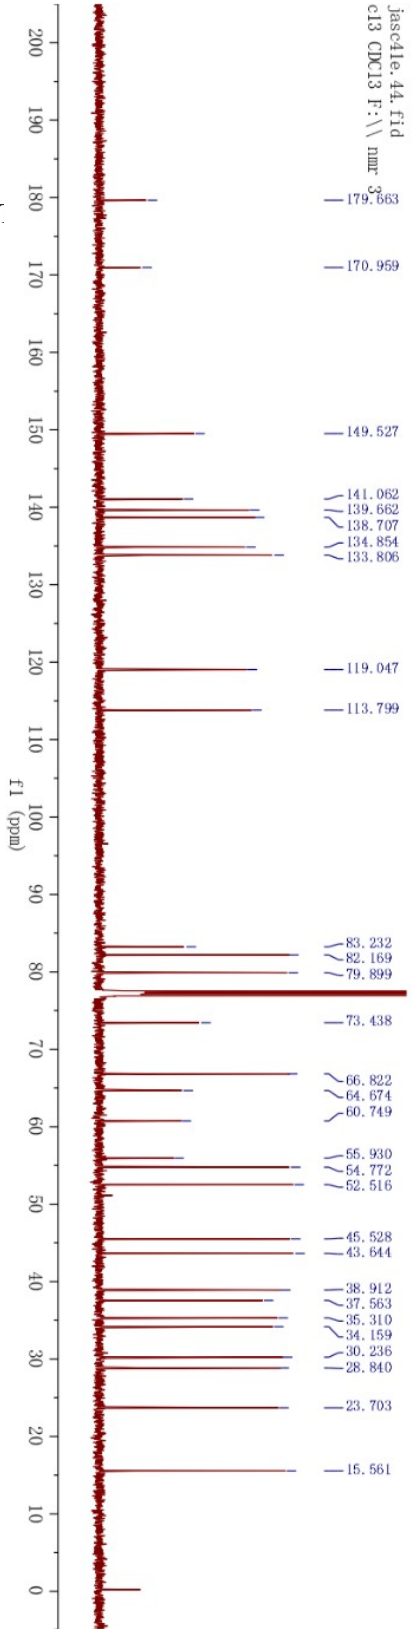

S32. <sup>13</sup>C NMR (DEPT)

S33.  $^1\text{H}$ - $^1\text{H}$  COSY (6)

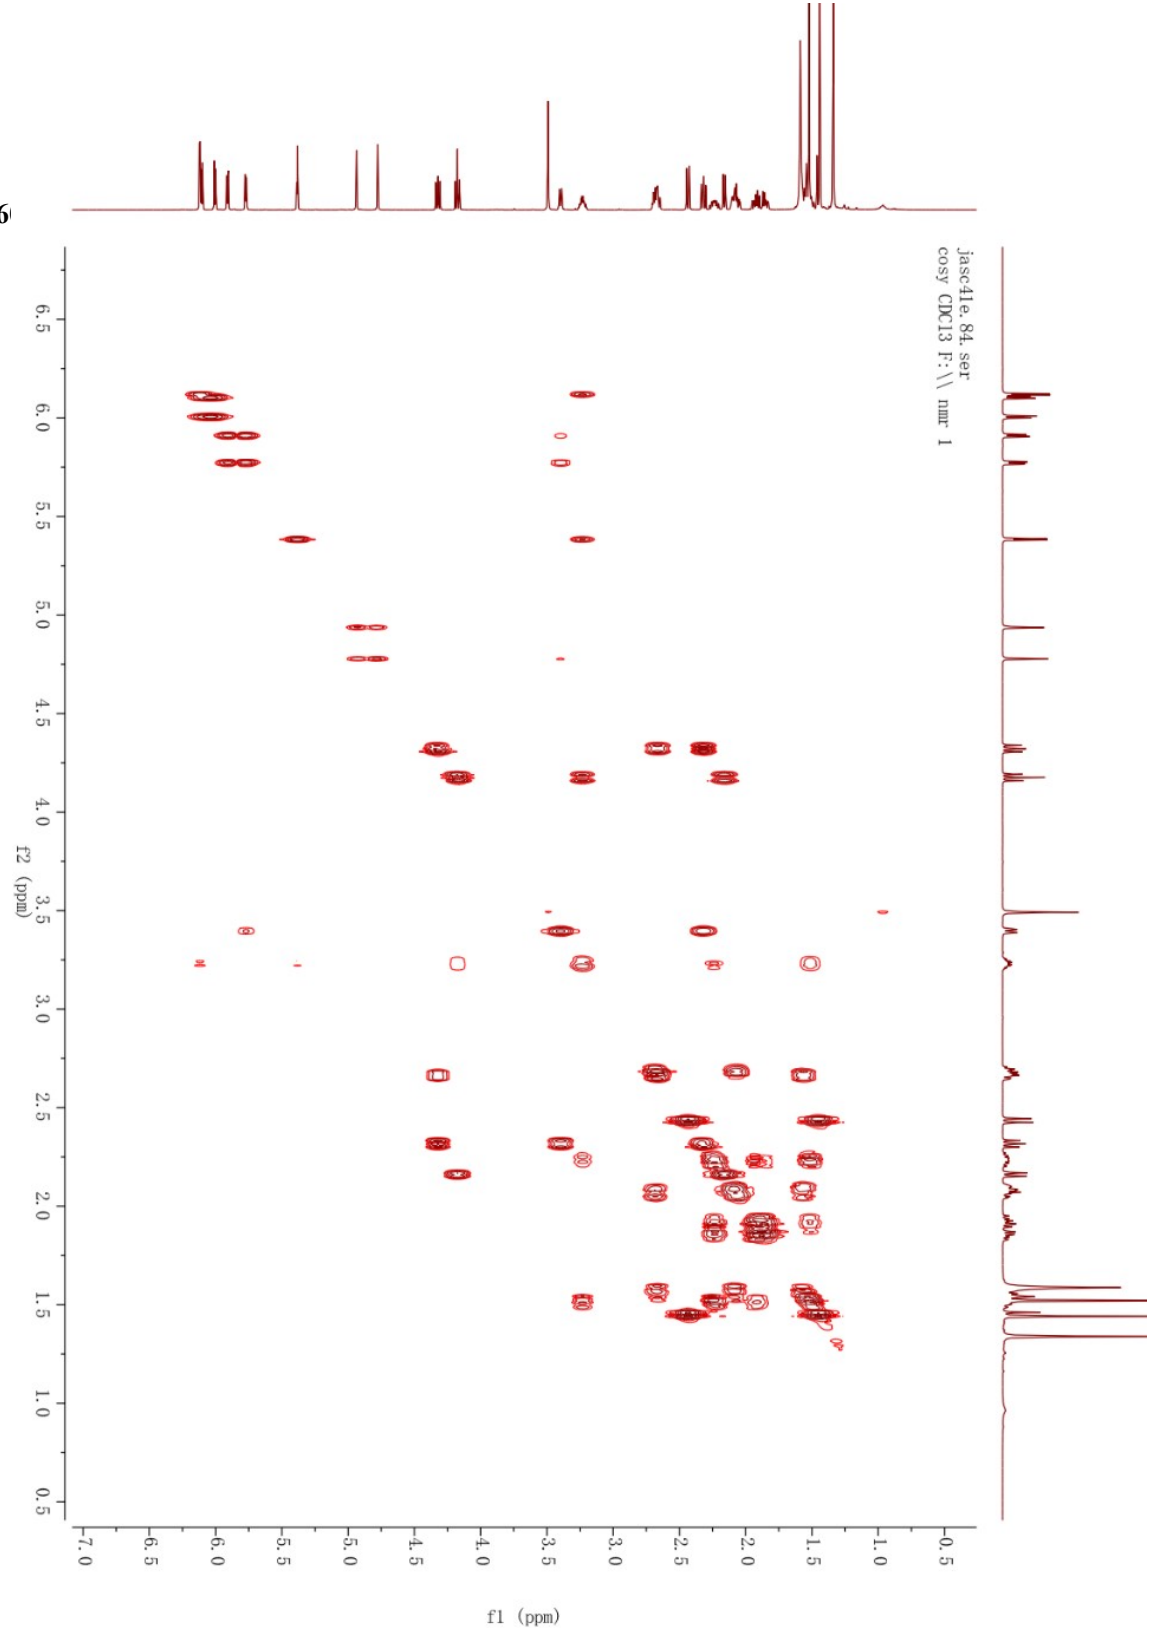

S34. HSQC spectrum

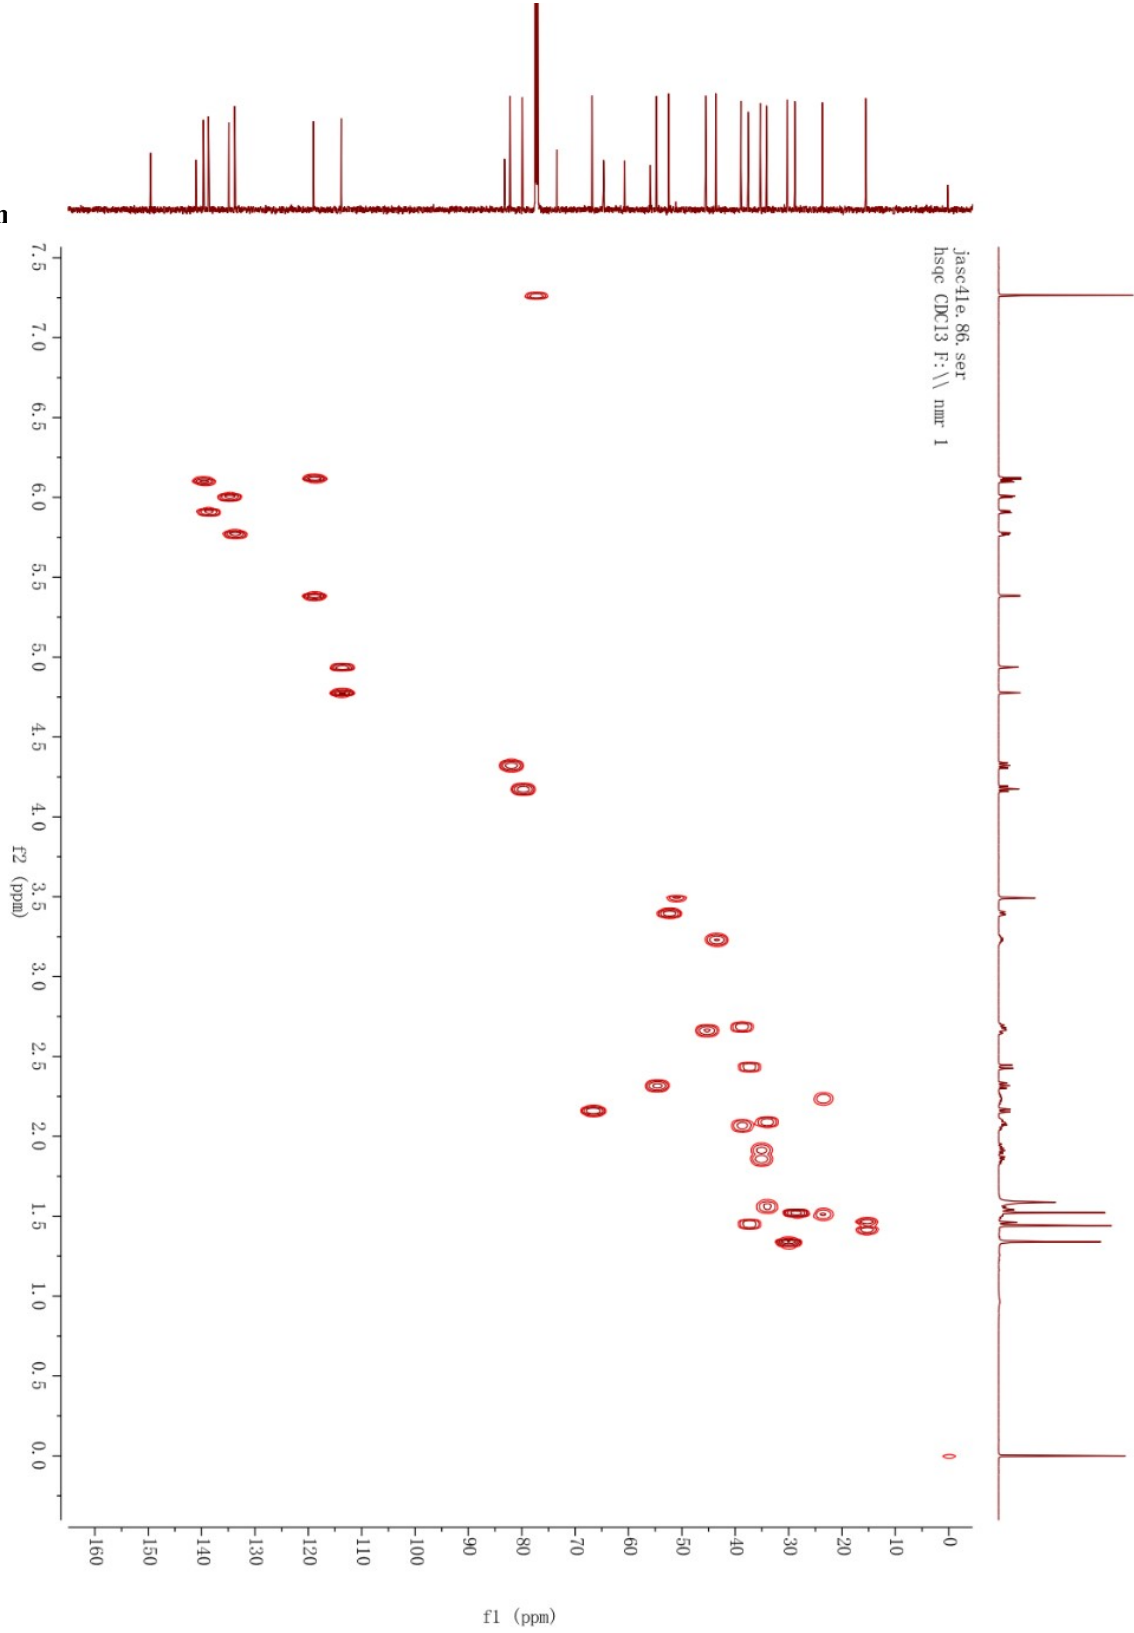

S35. HMBC spectrum

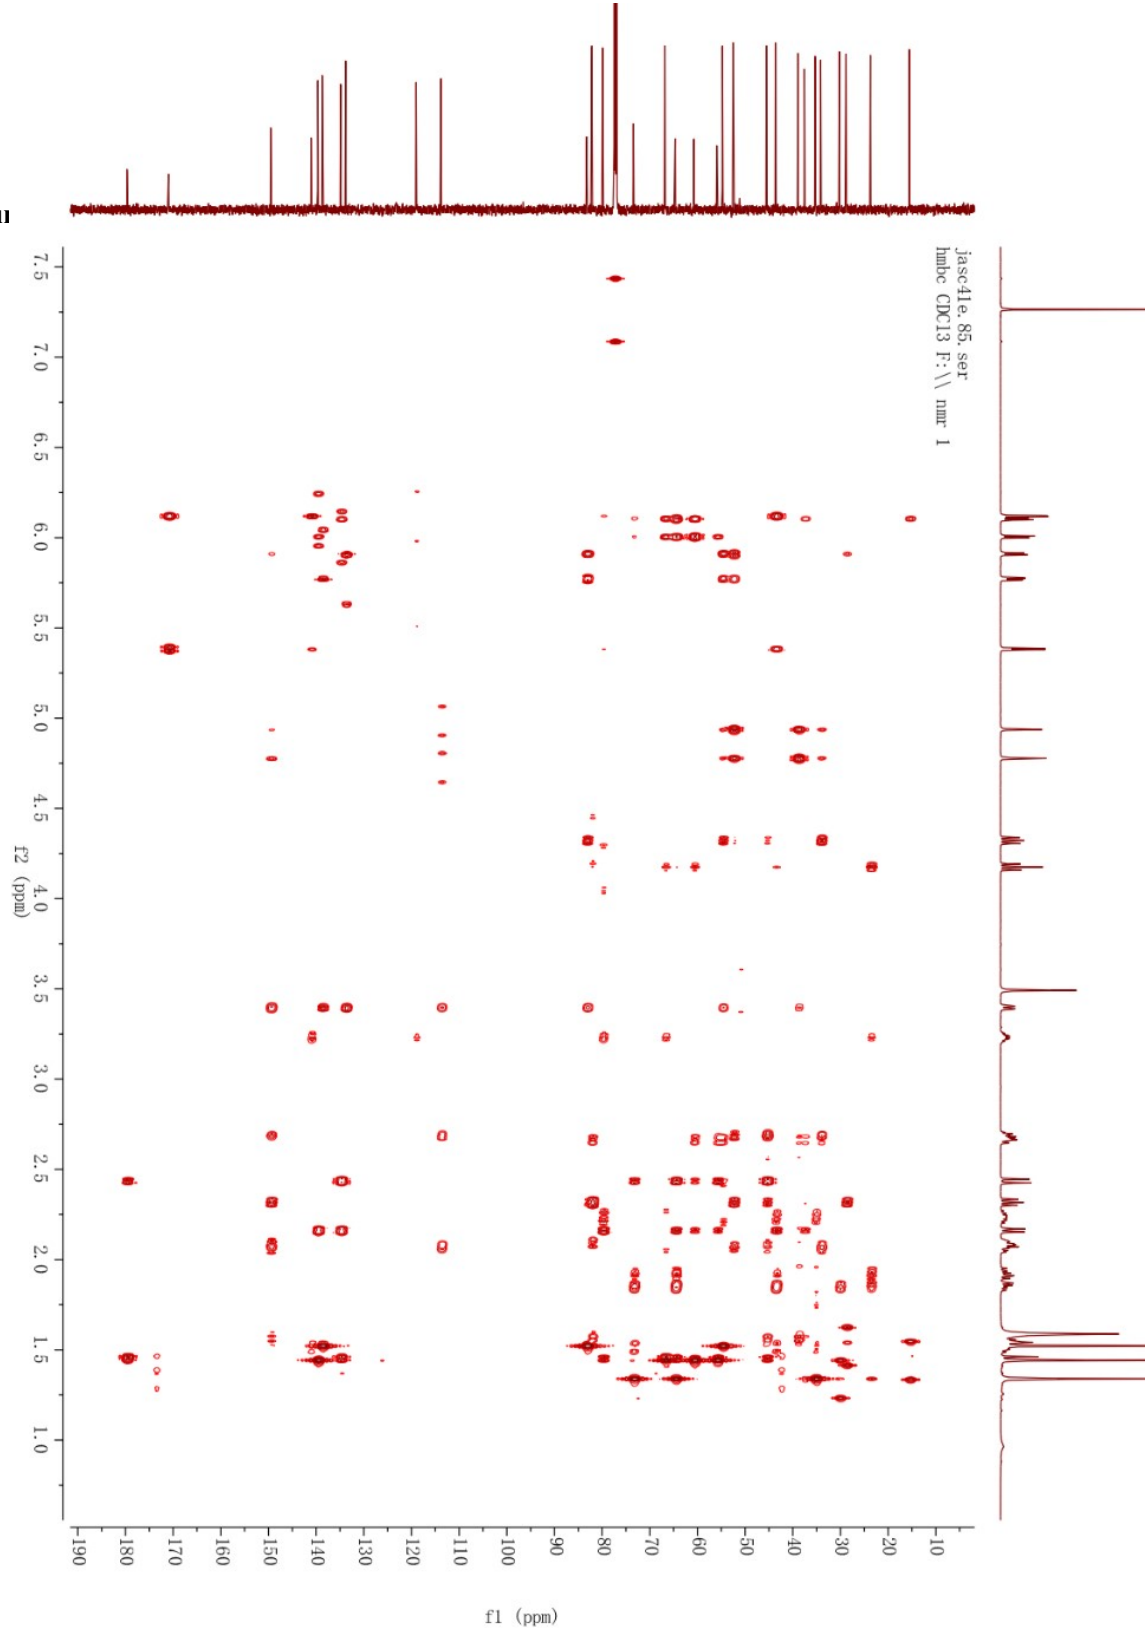

S36. ROESY spectrum

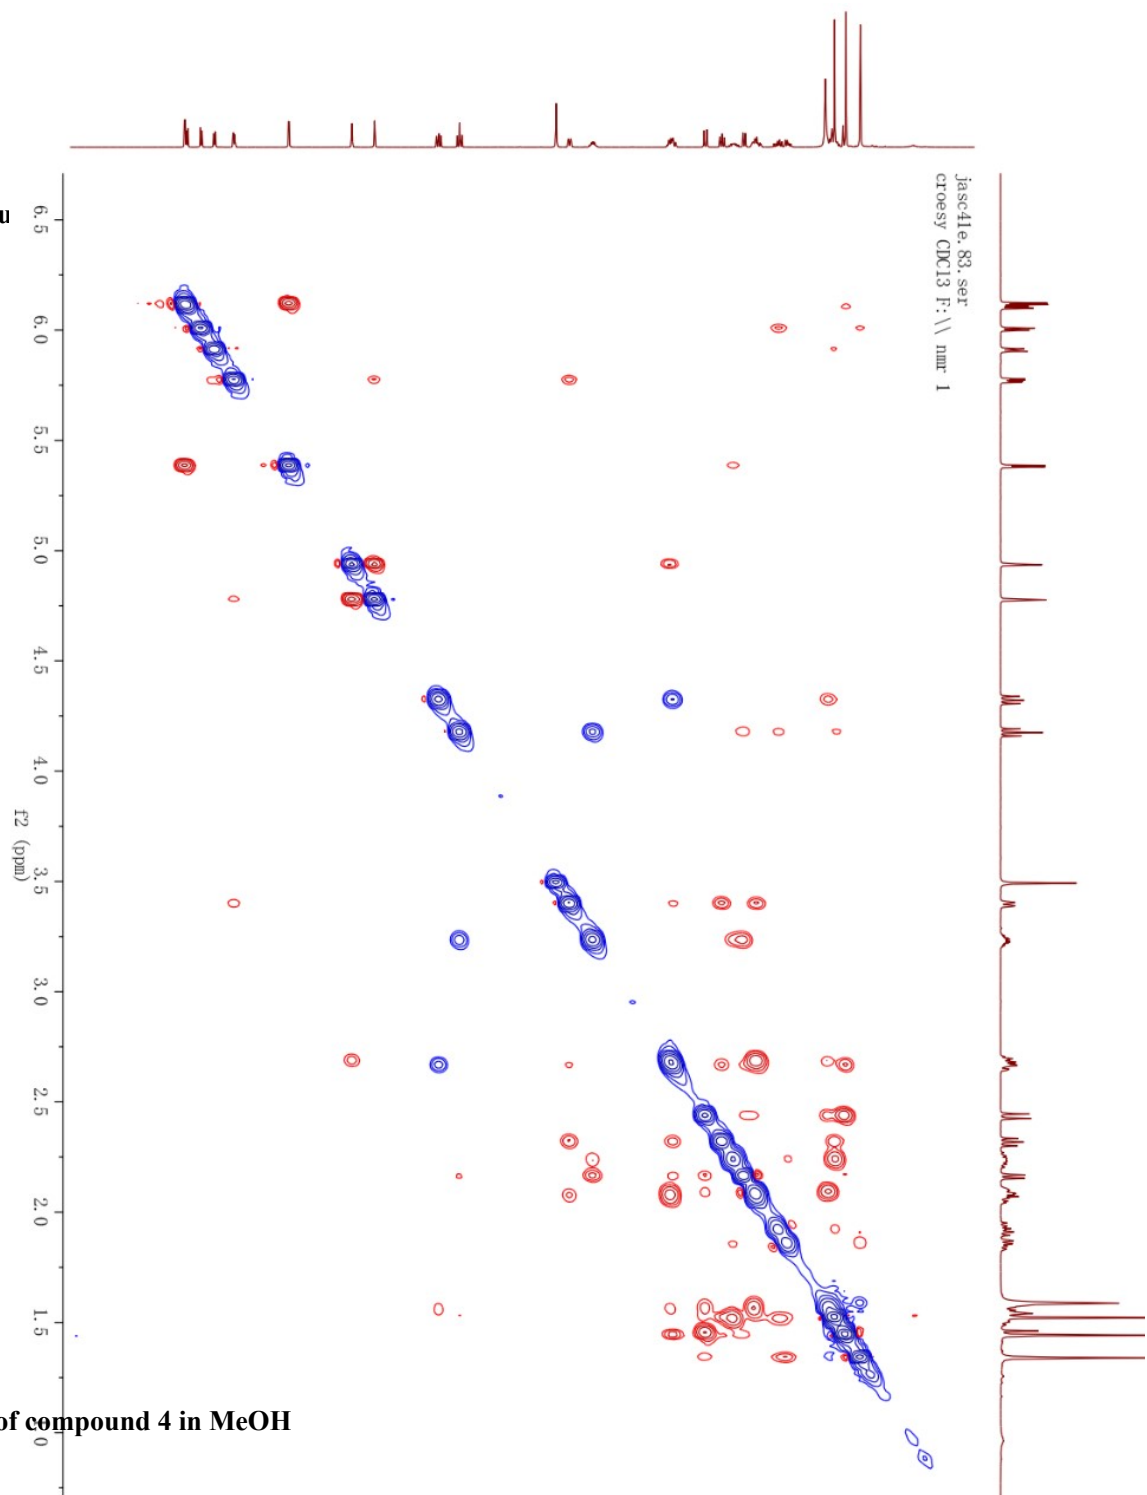

S37.  $[\alpha]_D$  spectrum of compound 4 in MeOH

**Rudolph Research Analytical**

This sample was measured on an Autopol VI, Serial #91058  
 Manufactured by Rudolph Research Analytical, Hackettstown, NJ, USA.

Measurement Date : Wednesday, 11-DEC-2024

Set Temperature : 20.0

Time Delay : Disabled

Delay between Measurement : Disabled

| n | Average | Std.Dev. | % RSD | Maximum | Minimum |
|---|---------|----------|-------|---------|---------|
| 5 | -39.53  | 0.00     | 0.00  | -39.53  | -39.53  |

| S.No | Sample ID | Time        | Result | Scale | OR °Arc | WLG.nm | Lg.mm  | Conc.g/100ml | Temp. |
|------|-----------|-------------|--------|-------|---------|--------|--------|--------------|-------|
| 1    | JASC-42   | 04:08:44 PM | -39.53 | SR    | -0.017  | 589    | 100.00 | 0.043        | 20.0  |
| 2    | JASC-42   | 04:08:51 PM | -39.53 | SR    | -0.017  | 589    | 100.00 | 0.043        | 20.0  |
| 3    | JASC-42   | 04:08:57 PM | -39.53 | SR    | -0.017  | 589    | 100.00 | 0.043        | 20.0  |
| 4    | JASC-42   | 04:09:03 PM | -39.53 | SR    | -0.017  | 589    | 100.00 | 0.043        | 20.0  |
| 5    | JASC-42   | 04:09:10 PM | -39.53 | SR    | -0.017  | 589    | 100.00 | 0.043        | 20.0  |

### S38. IR spectrum of compound 4

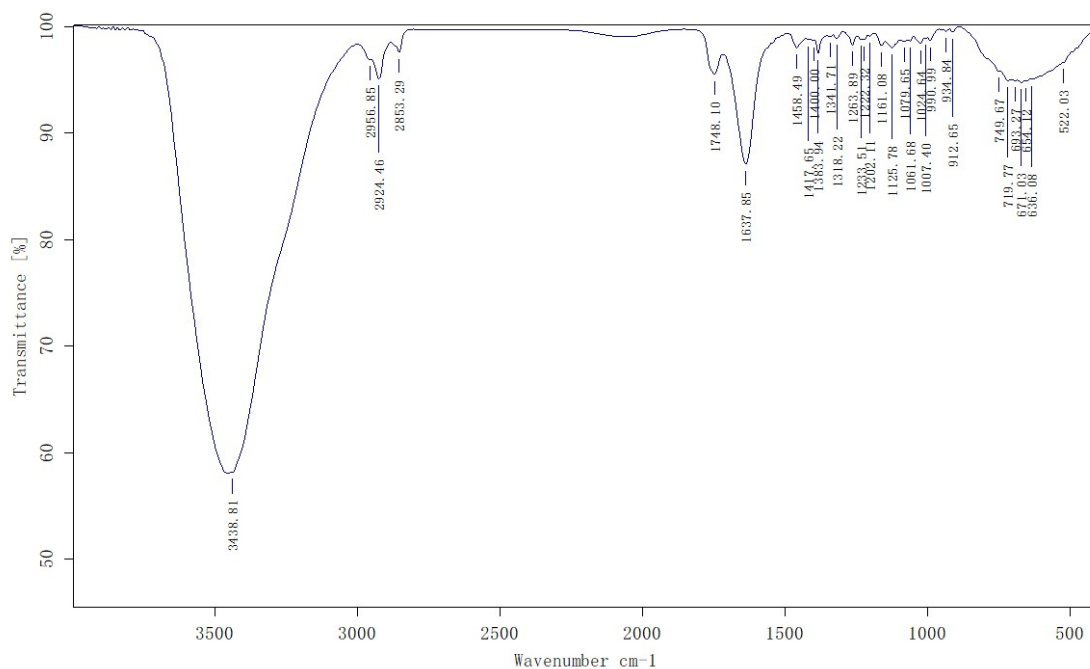

Sample Name: jasc-42

Sample Form: KBr

Path of File: E:\data

Date of Measurement: 2025/1/2

Resolution: 4

Aperture Setting: 6 mm

Number of Background Scans: 16

Number of Sample Scans: 16

Beamsplitter Setting: KBr

Source Setting: MIR

Instrument Type: BRUKER VERTEX 70

Soft Version: OPUS8.1



S39. ECD and UV spectra of compound 4

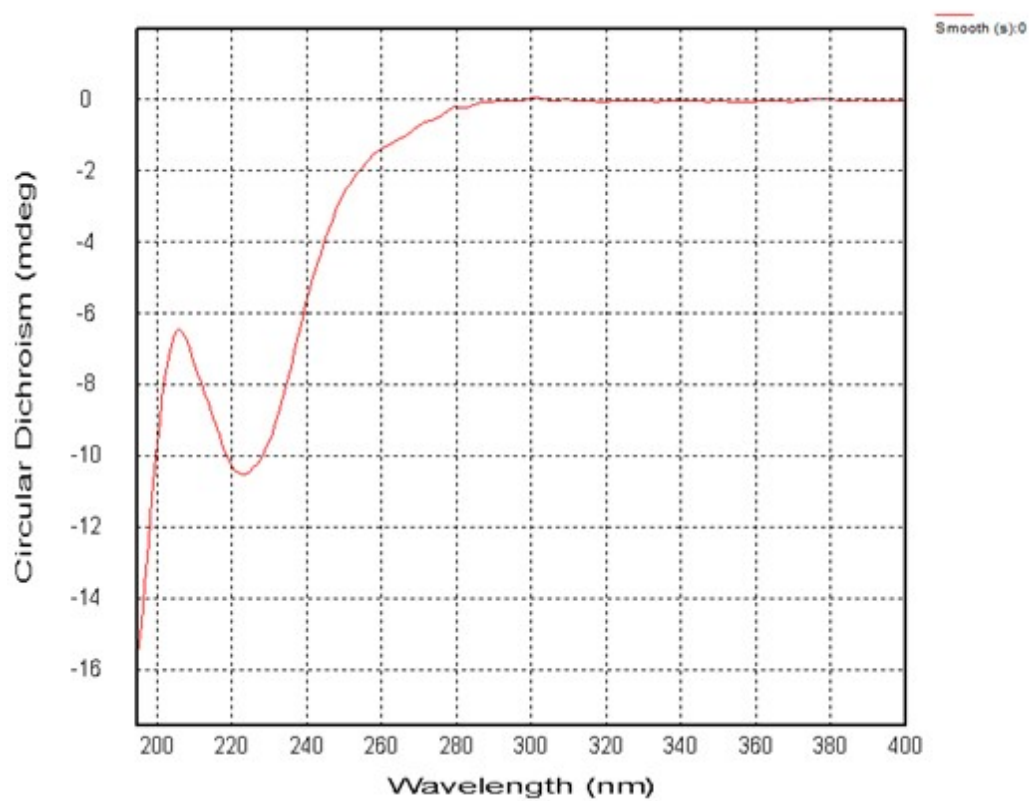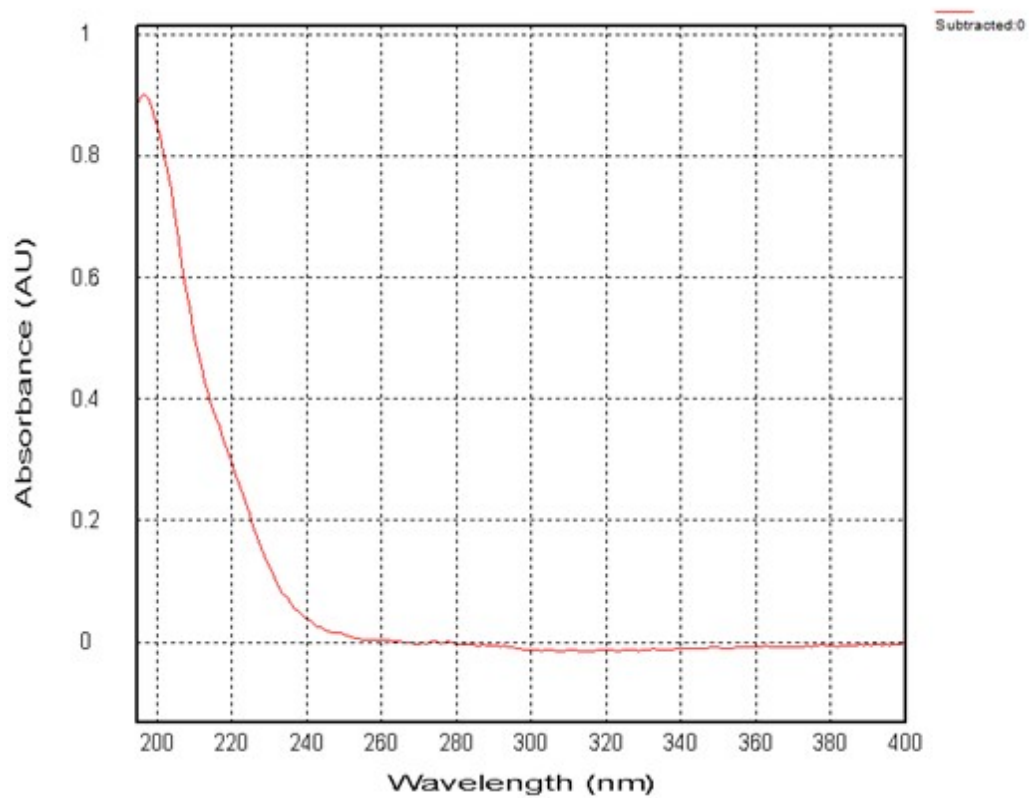

### S40. HRESIMS of compound 4

| Elmt | Val. | Min | Max | Elmt | Val. | Min | Max | Use Adduct |
|------|------|-----|-----|------|------|-----|-----|------------|
| H    | 1    | 0   | 300 | O    | 2    | 0   | 20  | H          |
| C    | 4    | 0   | 150 | Cl   | 1    | 0   | 0   | Na         |
| N    | 3    | 0   | 1   |      |      |     |     |            |

Error Margin (ppm): 100  
 HC Ratio: unlimited  
 Max Isotopes: all  
 MSn Iso RI (%): 75.00

DBE Range: -2.0 - 1000.0  
 Apply N Rule: yes  
 Isotope RI (%): 1.00  
 MSn Logic Mode: AND

Electron Ions: both  
 Use MSn Info: no  
 Isotope Res: 10000  
 Max Results: 500

Event#: 1 MS(E+) Ret. Time : 14.150 Scan#: 2123

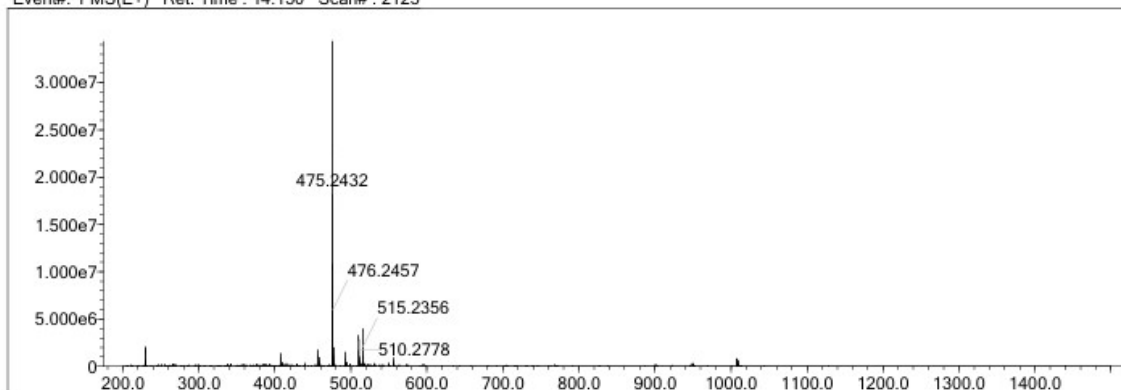

Measured region for 493.2594 m/z

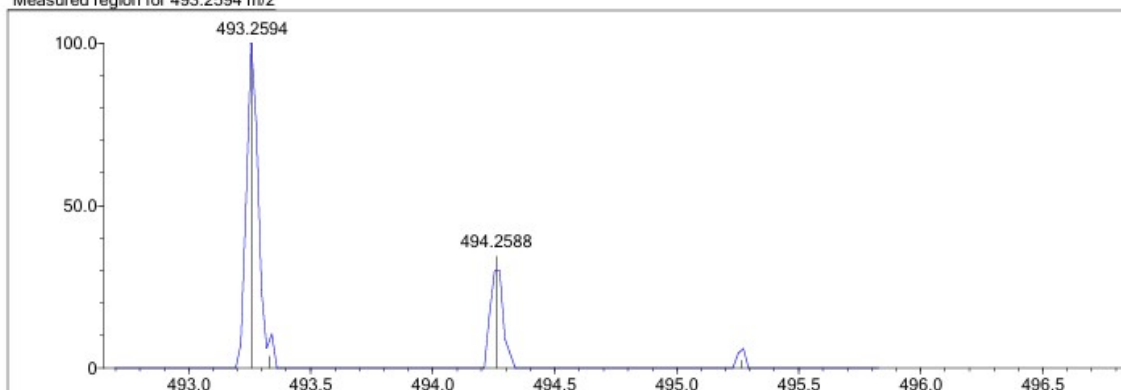

C30 H36 O6 [M+H]<sup>+</sup> : Predicted region for 493.2585 m/z

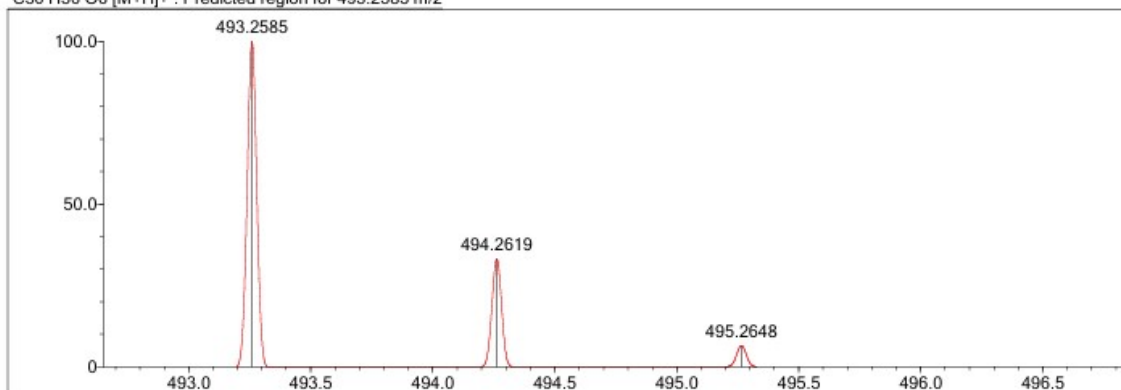

| Rank | Score | Formula (M) | Ion                | Meas. m/z | Pred. m/z | Df. (mDa) | Df. (ppm) | Iso   | DBE  |
|------|-------|-------------|--------------------|-----------|-----------|-----------|-----------|-------|------|
| 1    | 85.34 | C30 H36 O6  | [M+H] <sup>+</sup> | 493.2594  | 493.2585  | 0.9       | 1.82      | 87.13 | 13.0 |

S41. <sup>1</sup>H NMR (600 M)

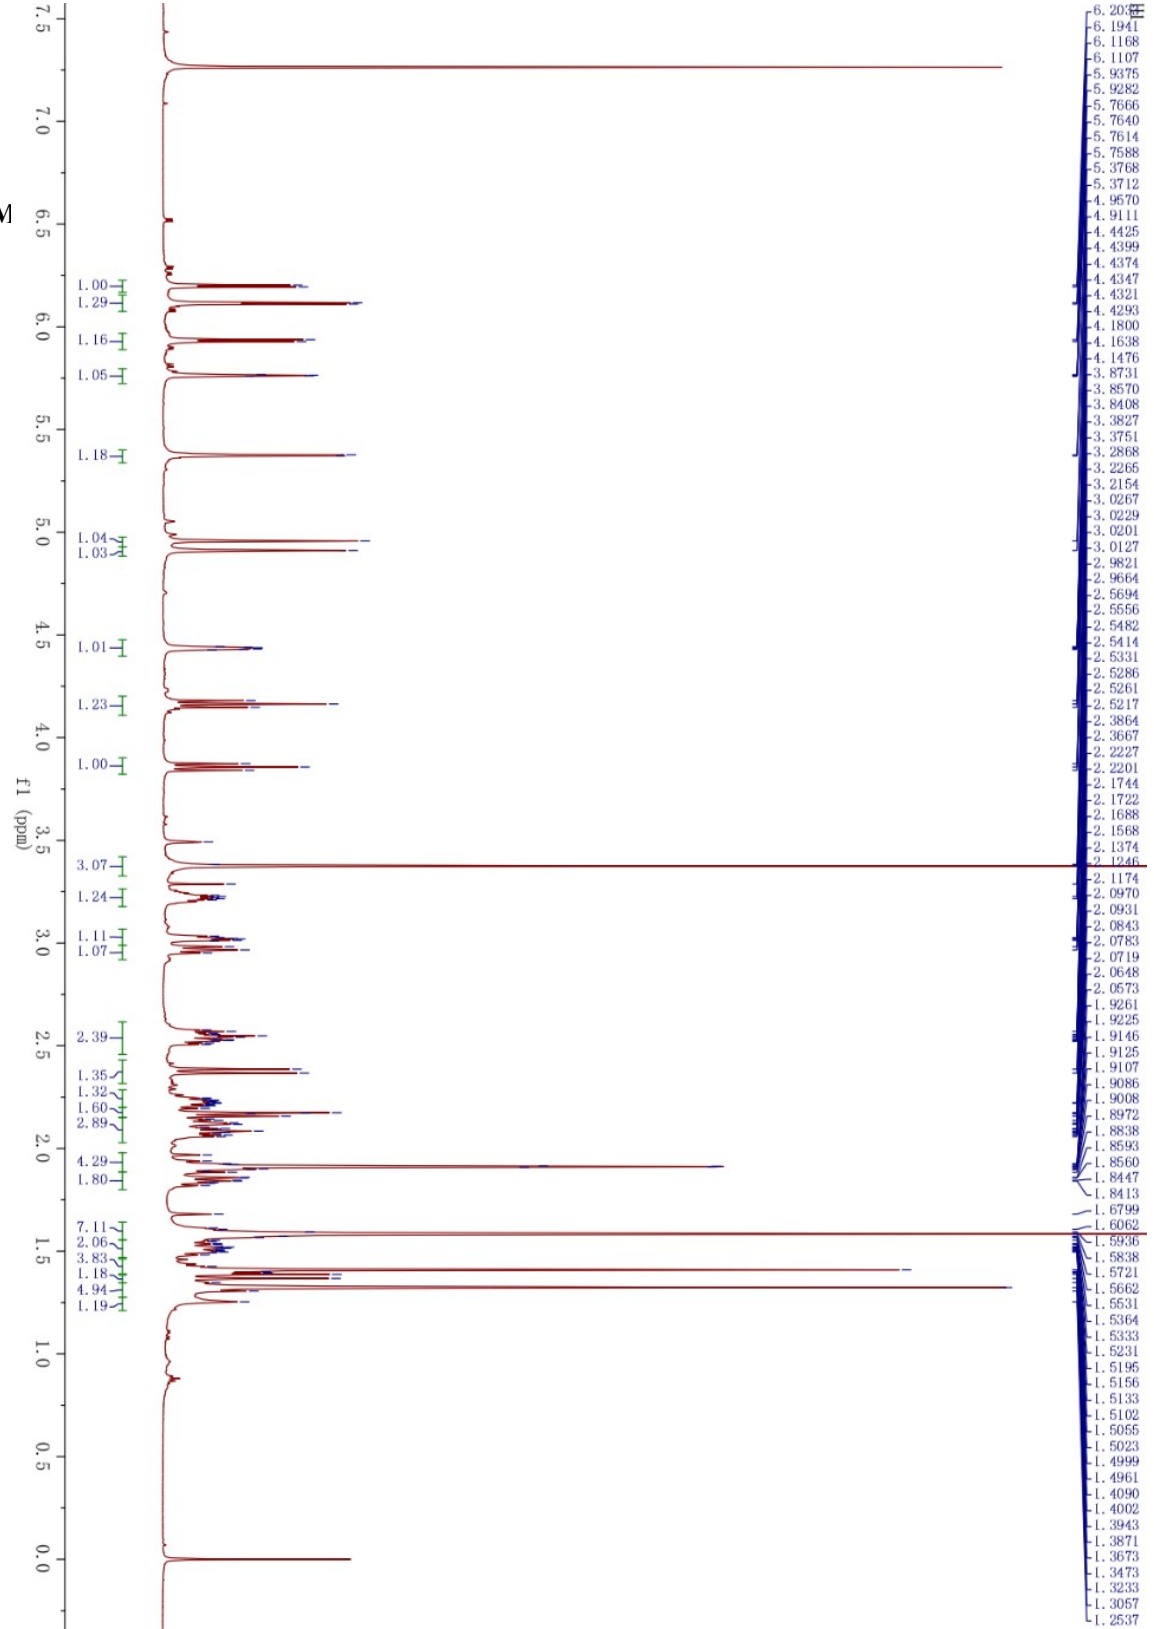

S42. <sup>13</sup>C NMR (DEPT)

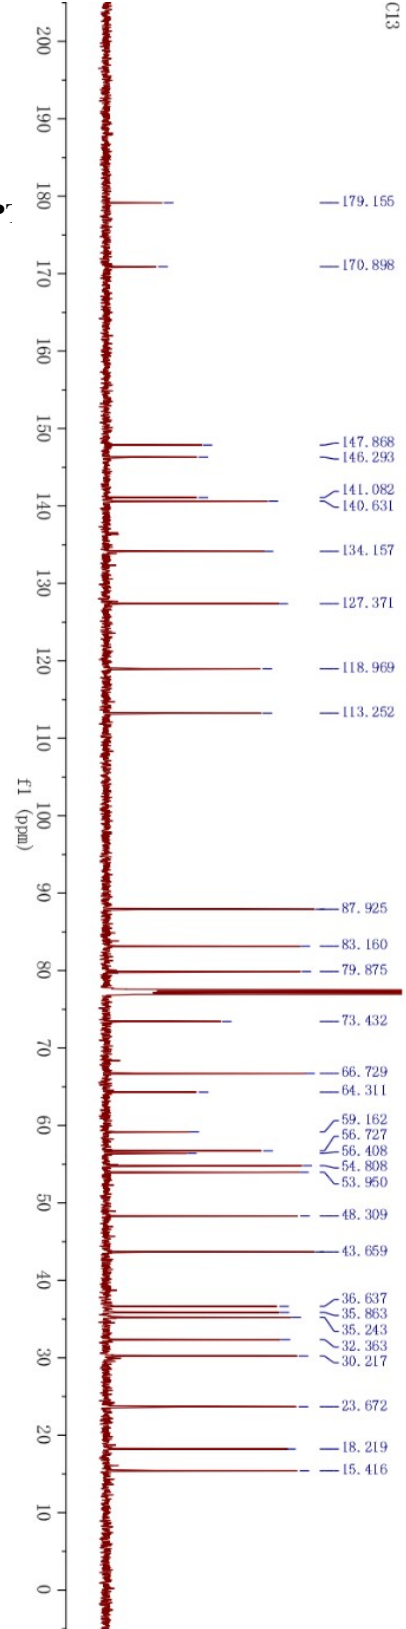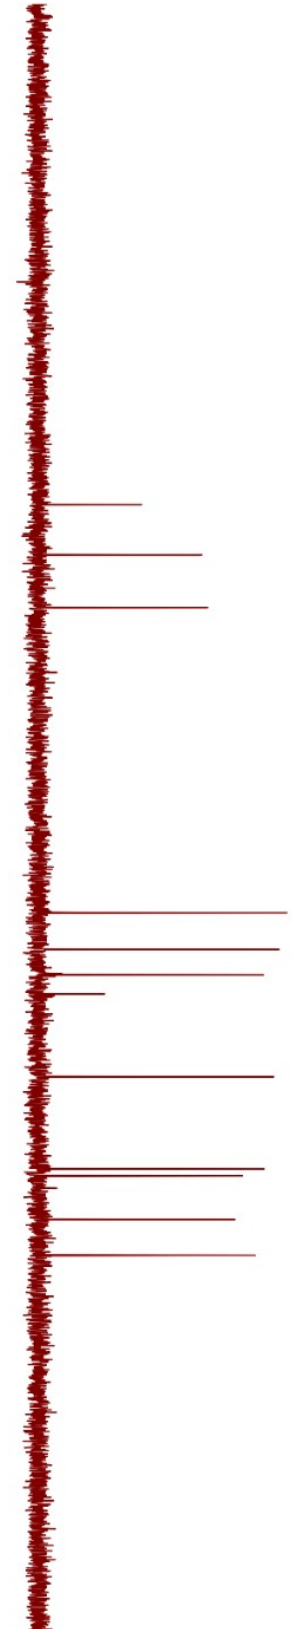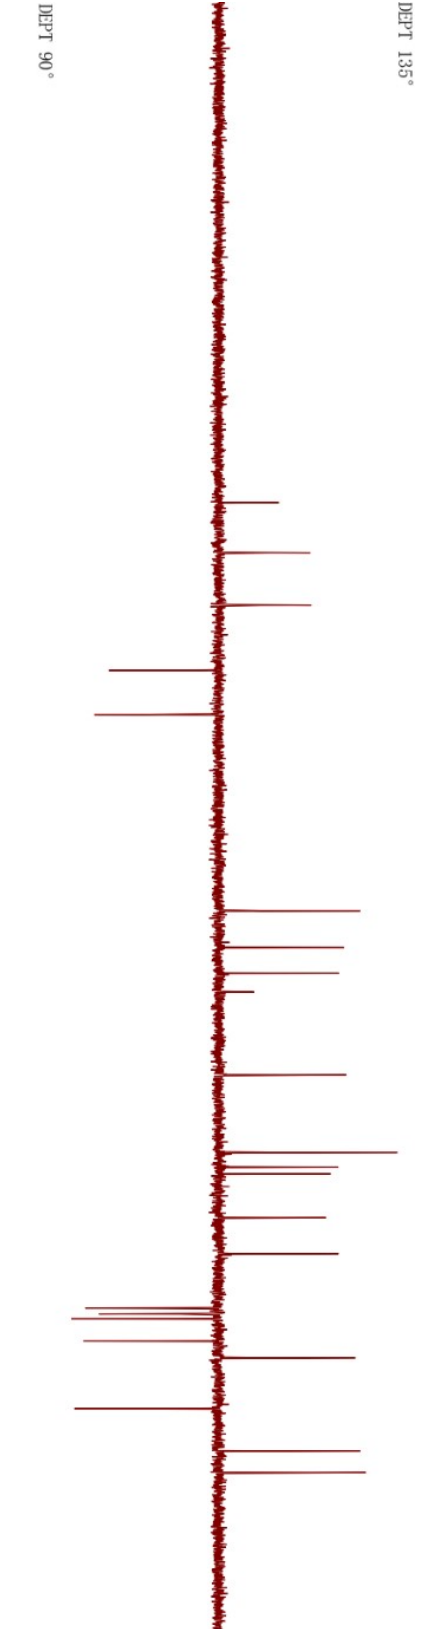

jasco36a\_84.ser  
cosy CMC13 F: \\ nmr 16

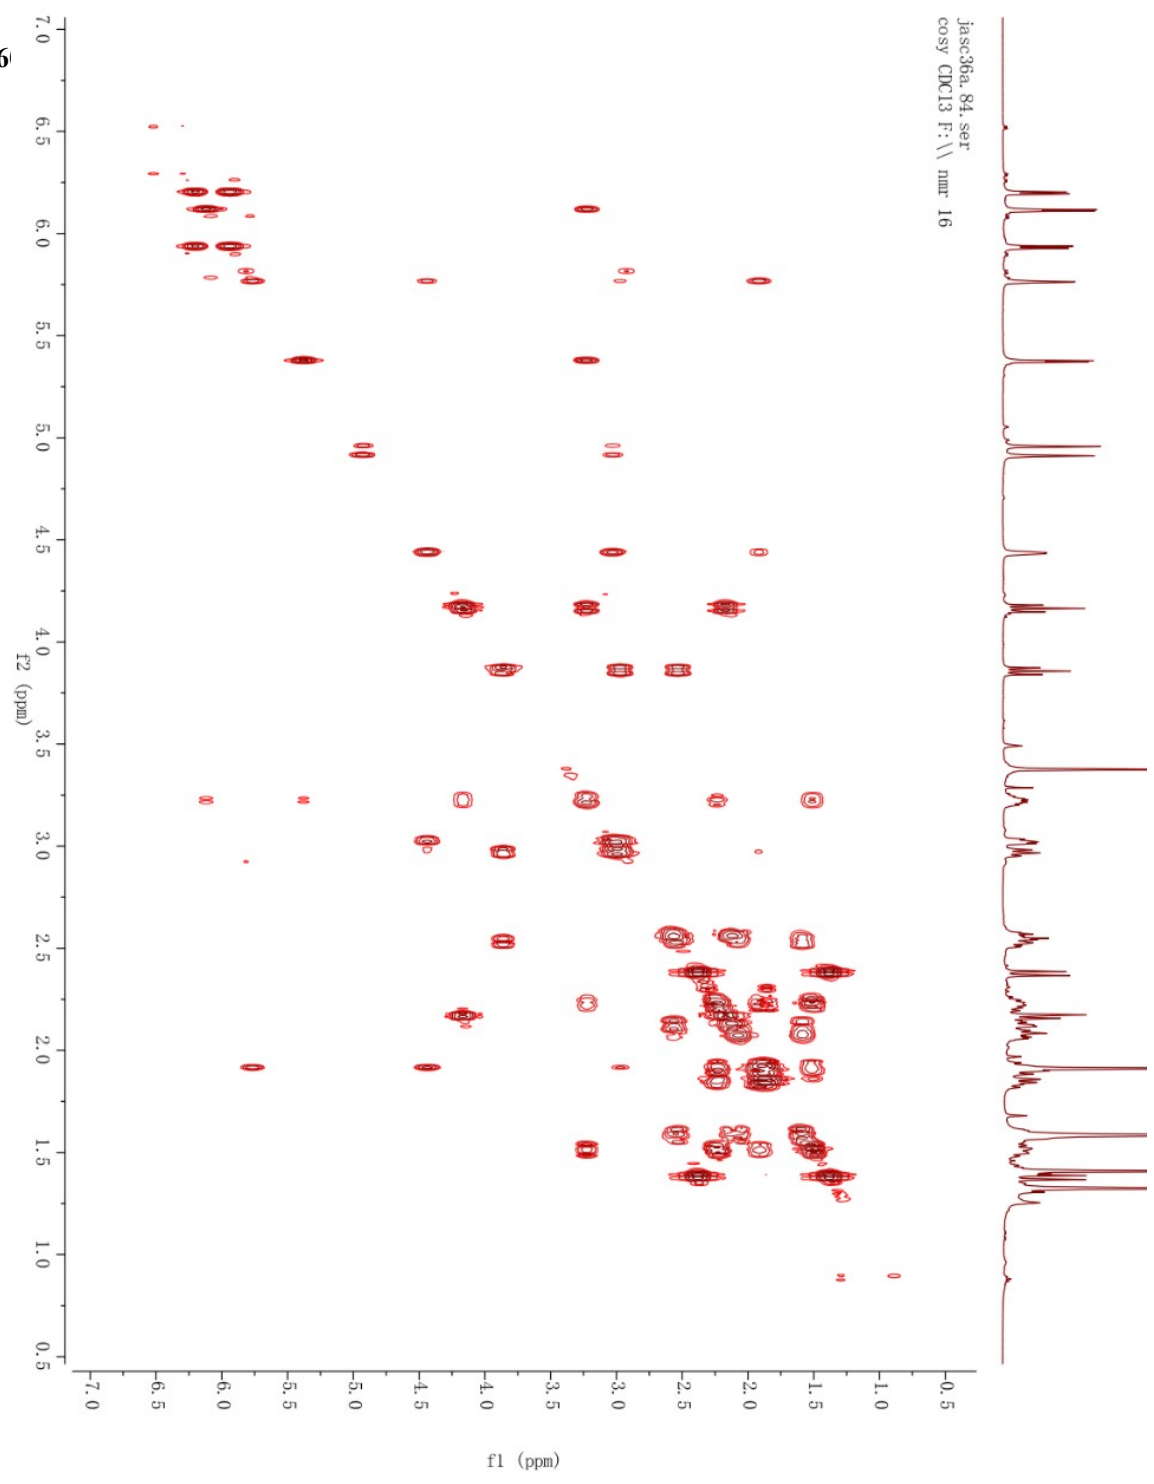

S43.  $^1\text{H}$ - $^1\text{H}$  COSY (6)

S44. HSQC spectrum

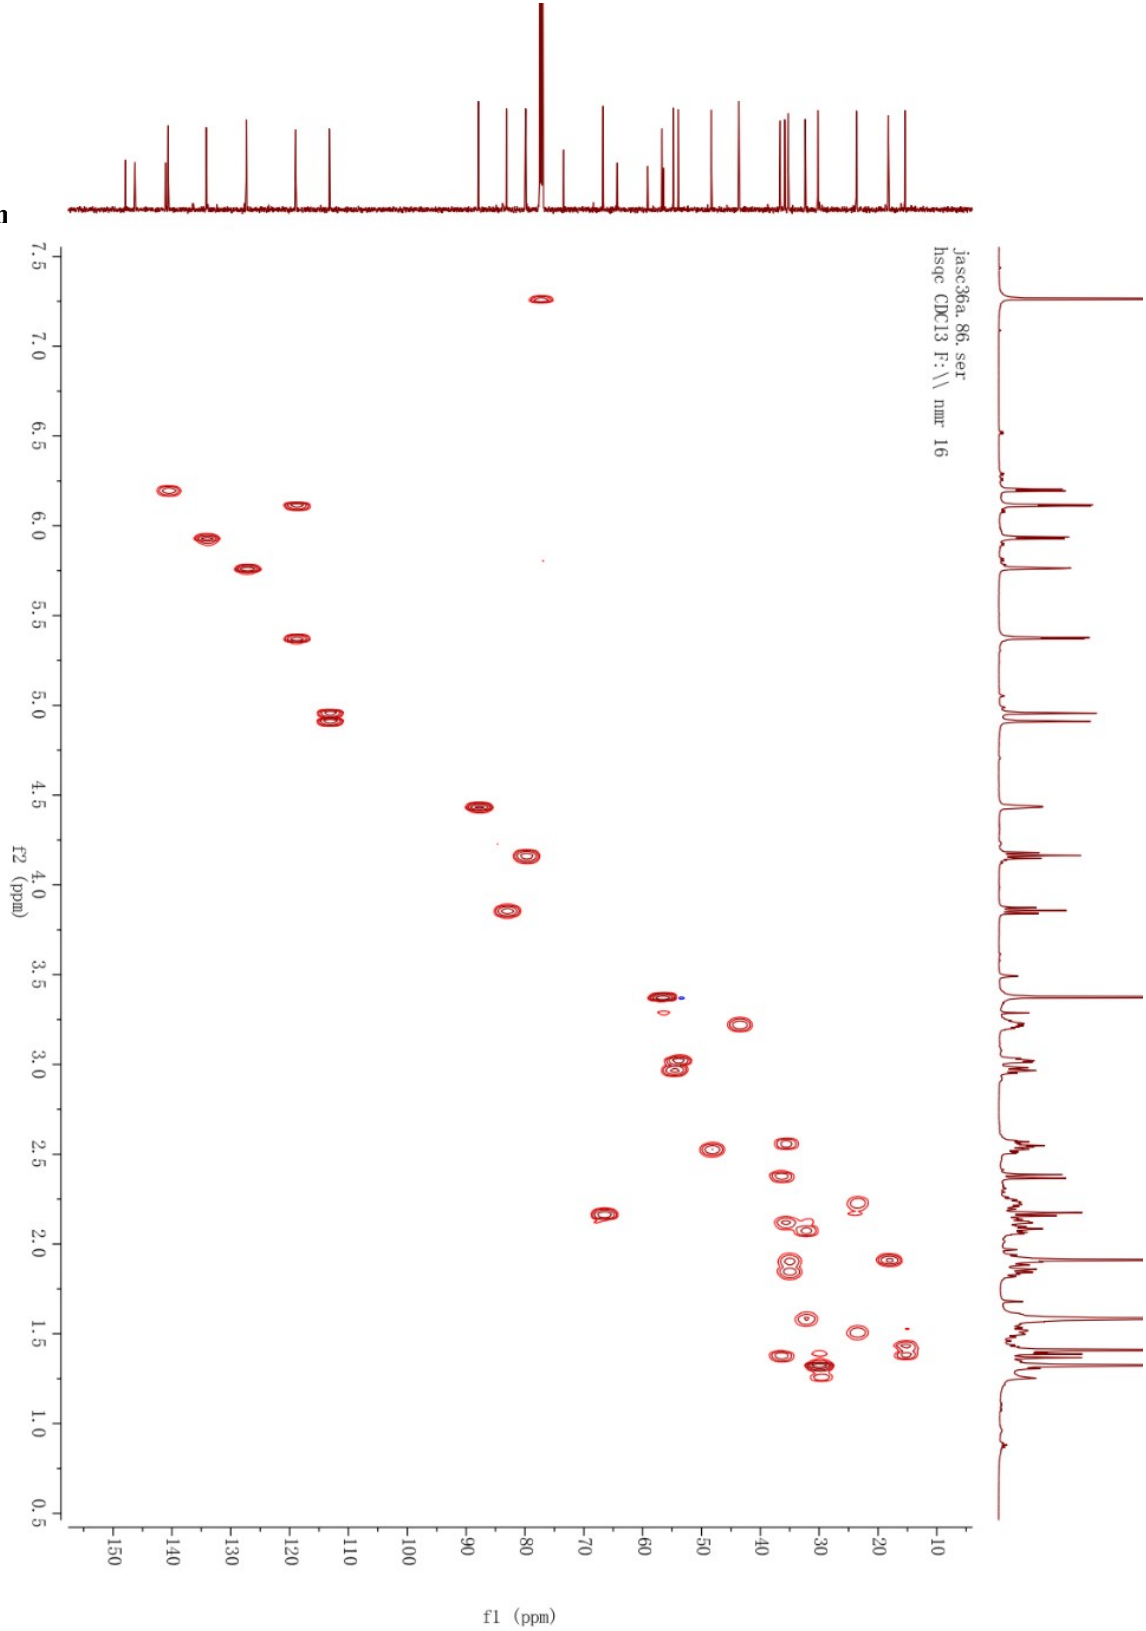

S45. HMBC spectrum

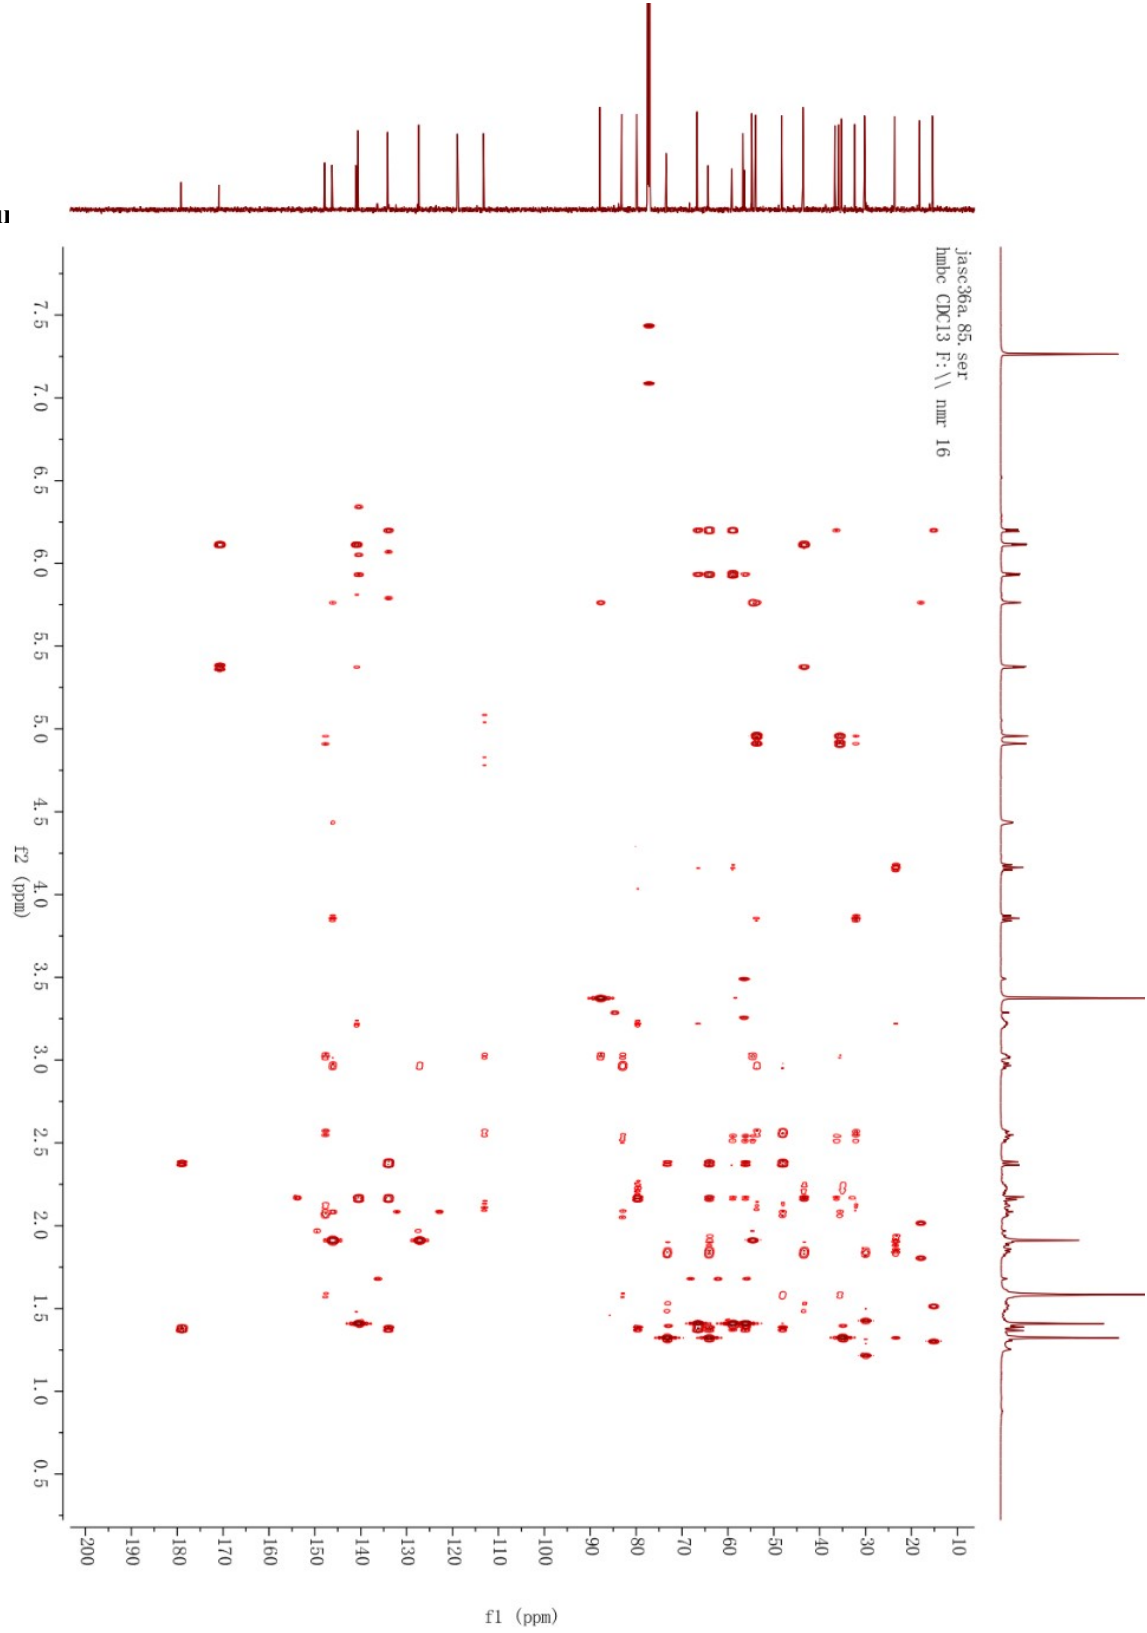

S46. ROESY spectrum

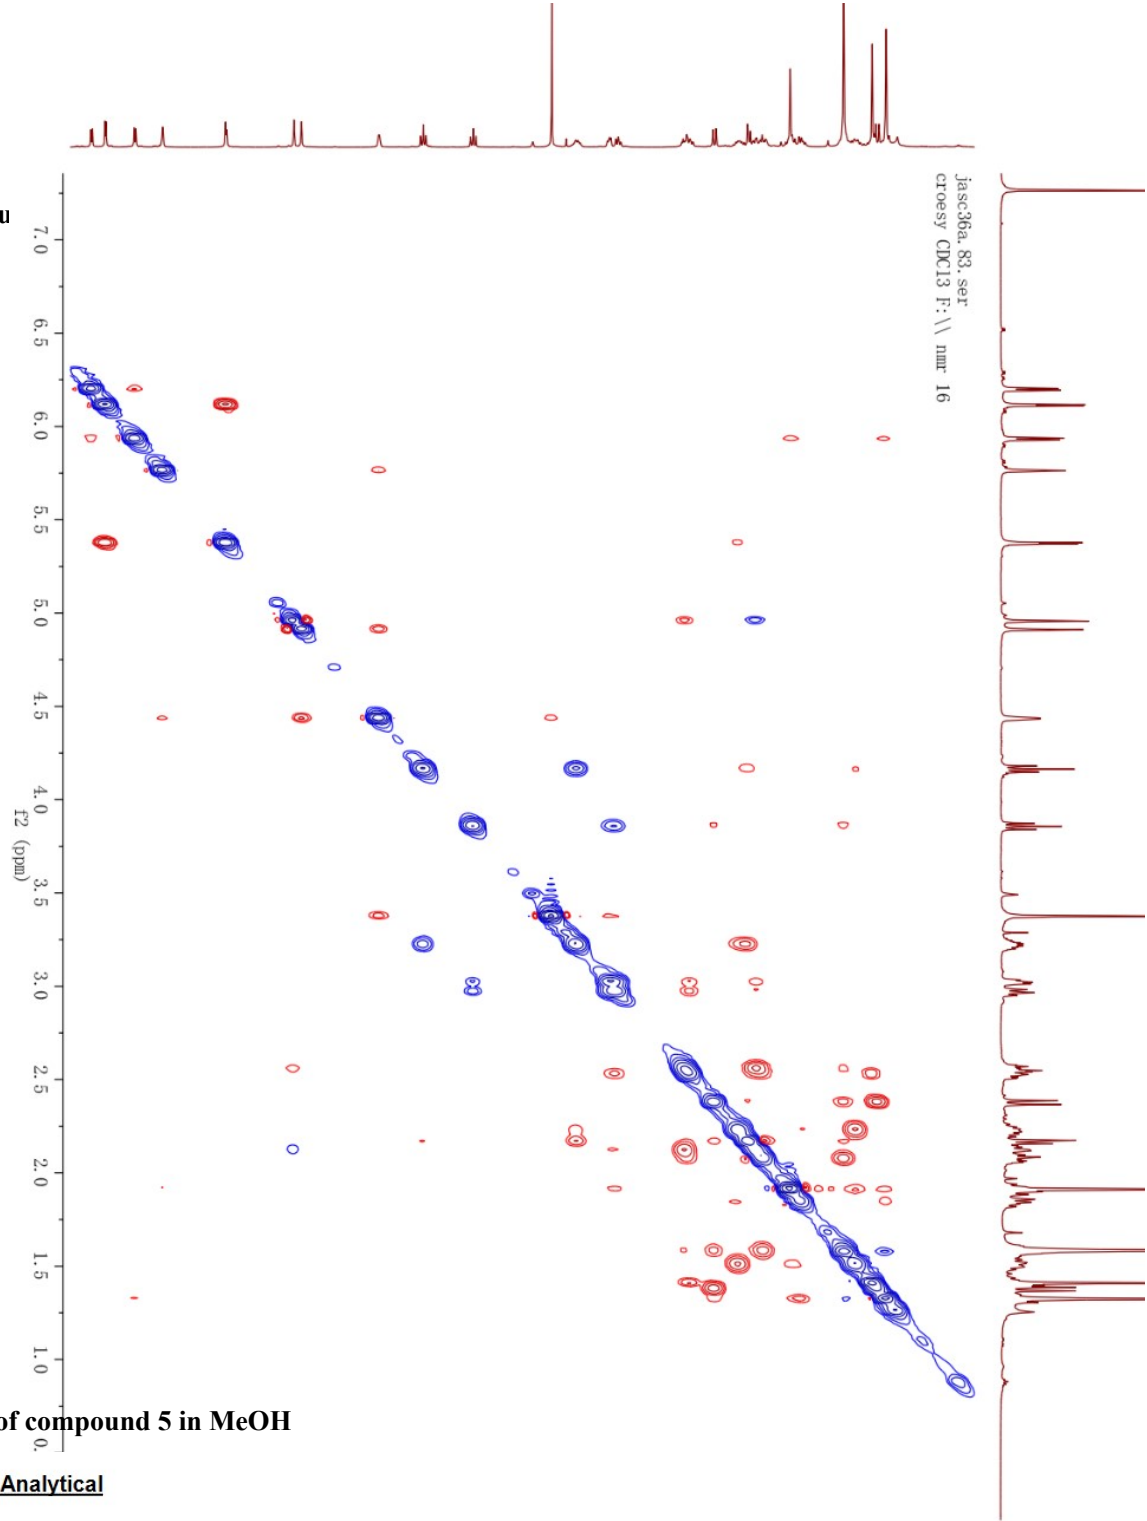

S47.  $[\alpha]_D$  spectrum of compound 5 in MeOH

**Rudolph Research Analytical**

This sample was measured on an Autopol VI, Serial #91058  
 Manufactured by Rudolph Research Analytical, Hackettstown, NJ, USA.

Measurement Date : Wednesday, 11-DEC-2024

Set Temperature : 20.0

Time Delay : Disabled

Delay between Measurement : Disabled

| n | Average | Std.Dev. | % RSD | Maximum | Minimum |
|---|---------|----------|-------|---------|---------|
| 5 | 12.47   | 0.96     | 7.69  | 12.90   | 10.75   |

| S.No | Sample ID | Time        | Result | Scale | OR °Arc | WLG.nm | Lg.mm  | Conc.g/100ml | Temp. |
|------|-----------|-------------|--------|-------|---------|--------|--------|--------------|-------|
| 1    | JASC-36   | 03:14:58 PM | 12.90  | SR    | 0.012   | 589    | 100.00 | 0.093        | 20.0  |
| 2    | JASC-36   | 03:15:04 PM | 12.90  | SR    | 0.012   | 589    | 100.00 | 0.093        | 20.0  |
| 3    | JASC-36   | 03:15:11 PM | 12.90  | SR    | 0.012   | 589    | 100.00 | 0.093        | 20.0  |
| 4    | JASC-36   | 03:15:17 PM | 12.90  | SR    | 0.012   | 589    | 100.00 | 0.093        | 20.0  |
| 5    | JASC-36   | 03:15:23 PM | 10.75  | SR    | 0.010   | 589    | 100.00 | 0.093        | 20.0  |



### S48. IR spectrum of compound 5

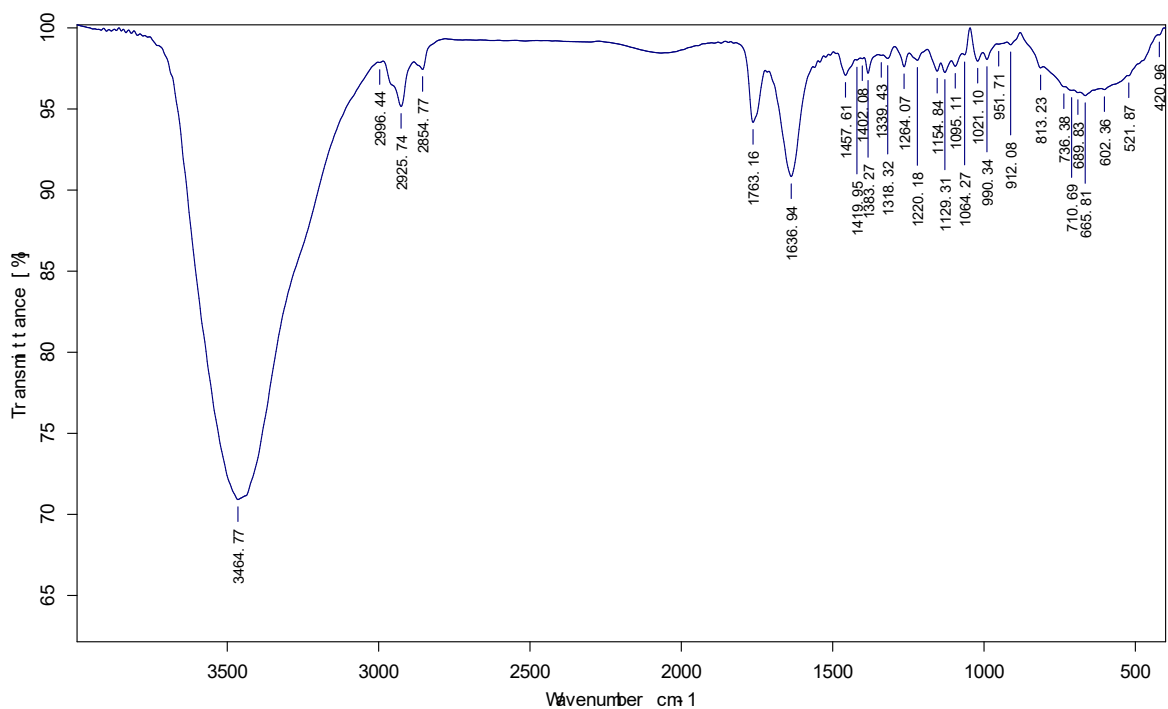

### S49. ECD and UV spectra of compound 5

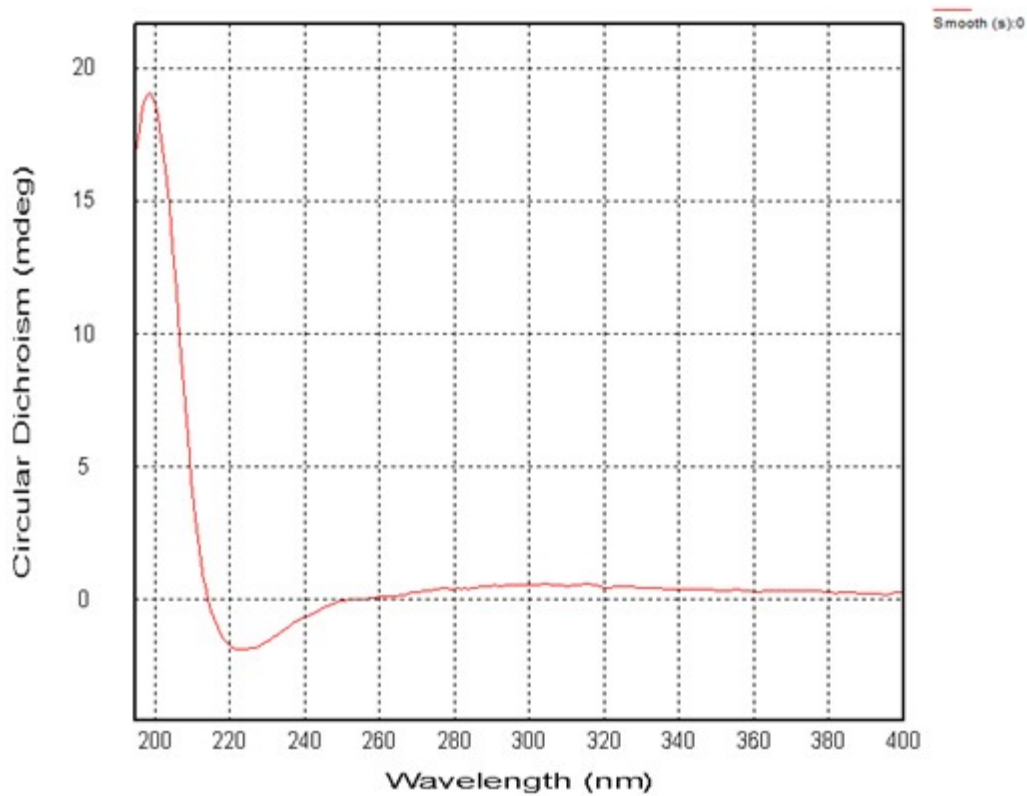

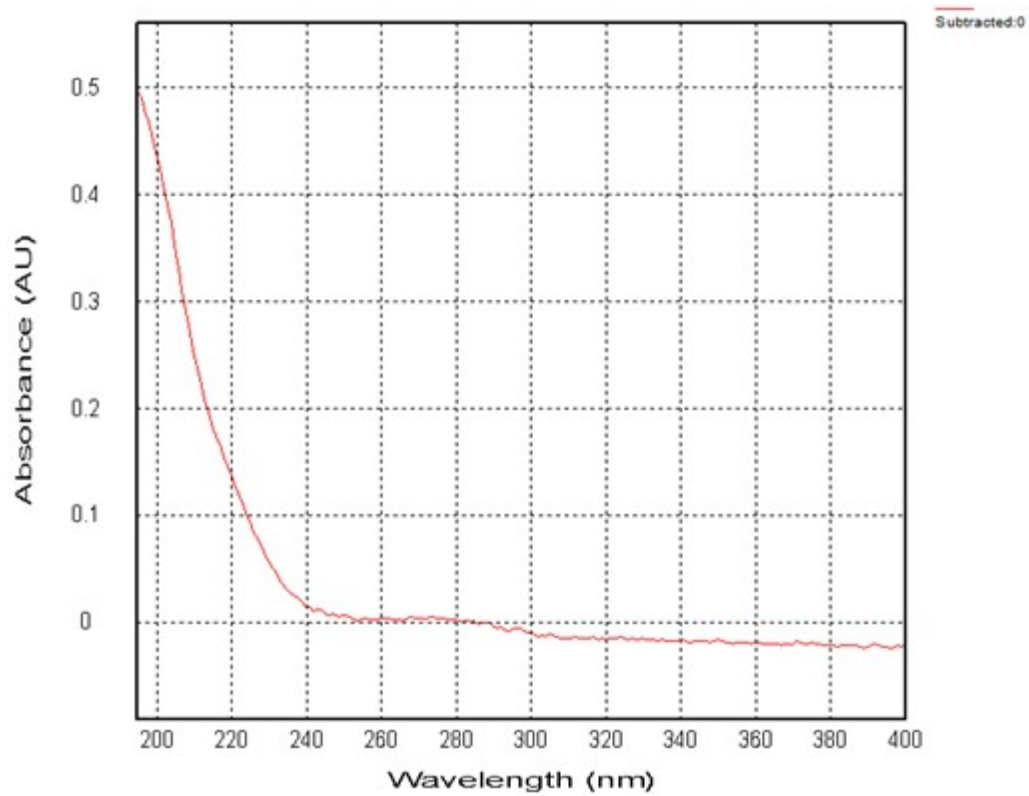

## S50. HRESIMS of compound 5

| Elmt | Val. | Min | Max | Elmt | Val. | Min | Max | Use Adduct |
|------|------|-----|-----|------|------|-----|-----|------------|
| H    | 1    | 0   | 300 | O    | 2    | 0   | 20  | H          |
| C    | 4    | 0   | 150 | Cl   | 1    | 0   | 0   | Na         |
| N    | 3    | 0   | 1   |      |      |     |     |            |

Error Margin (ppm): 100

HC Ratio: unlimited

Max Isotopes: all

MSn Iso RI (%): 75.00

DBE Range: -2.0 - 1000.0

Apply N Rule: yes

Isotope RI (%): 1.00

MSn Logic Mode: AND

Electron Ions: both

Use MSn Info: no

Isotope Res: 10000

Max Results: 500

Event#: 1 MS(E+) Ret. Time : 14.320 Scan#: 2149

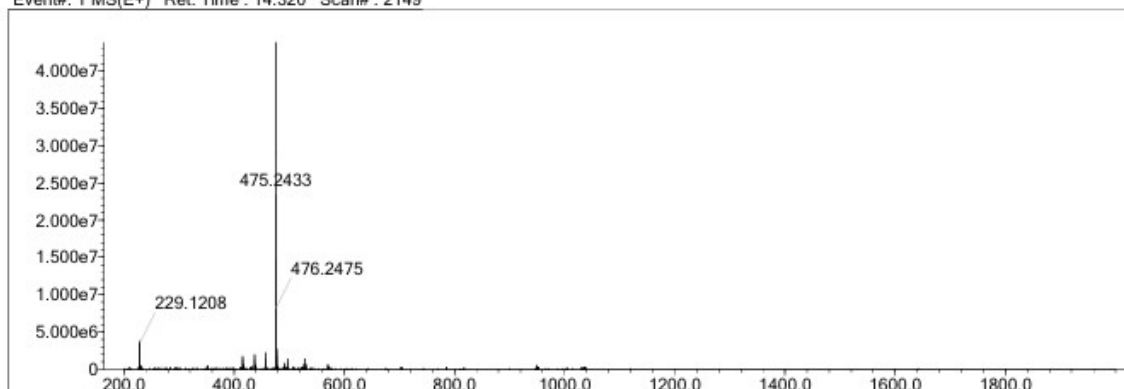

Measured region for 529.2551 m/z

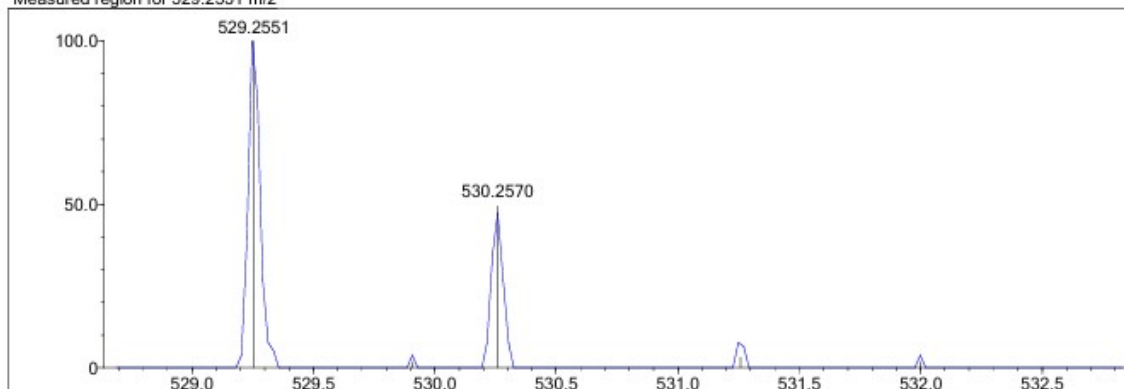

C31 H38 O6 [M+Na]<sup>+</sup> : Predicted region for 529.2561 m/z

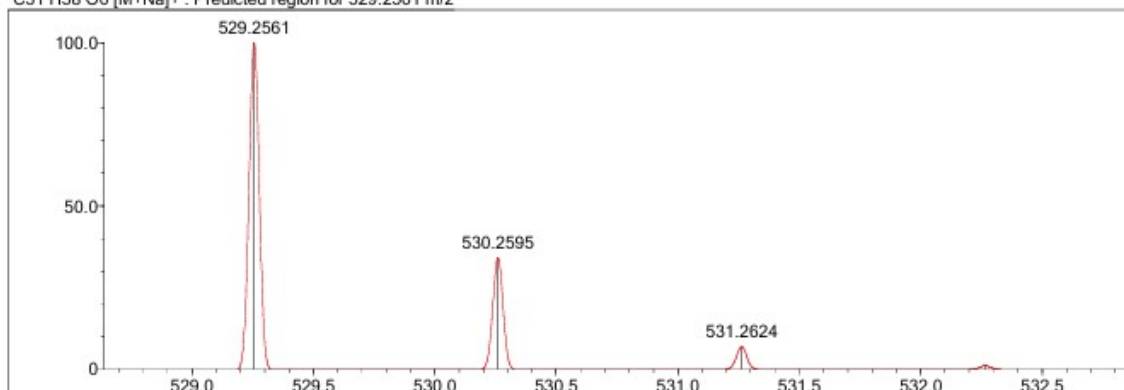

| Rank | Score | Formula (M) | Ion                 | Meas. m/z | Pred. m/z | Df. (mDa) | Df. (ppm) | Iso   | DBE  |
|------|-------|-------------|---------------------|-----------|-----------|-----------|-----------|-------|------|
| 2    | 56.29 | C31 H38 O6  | [M+Na] <sup>+</sup> | 529.2551  | 529.2561  | -1.0      | -1.89     | 57.57 | 13.0 |

S51. <sup>1</sup>H NMR (600 M)

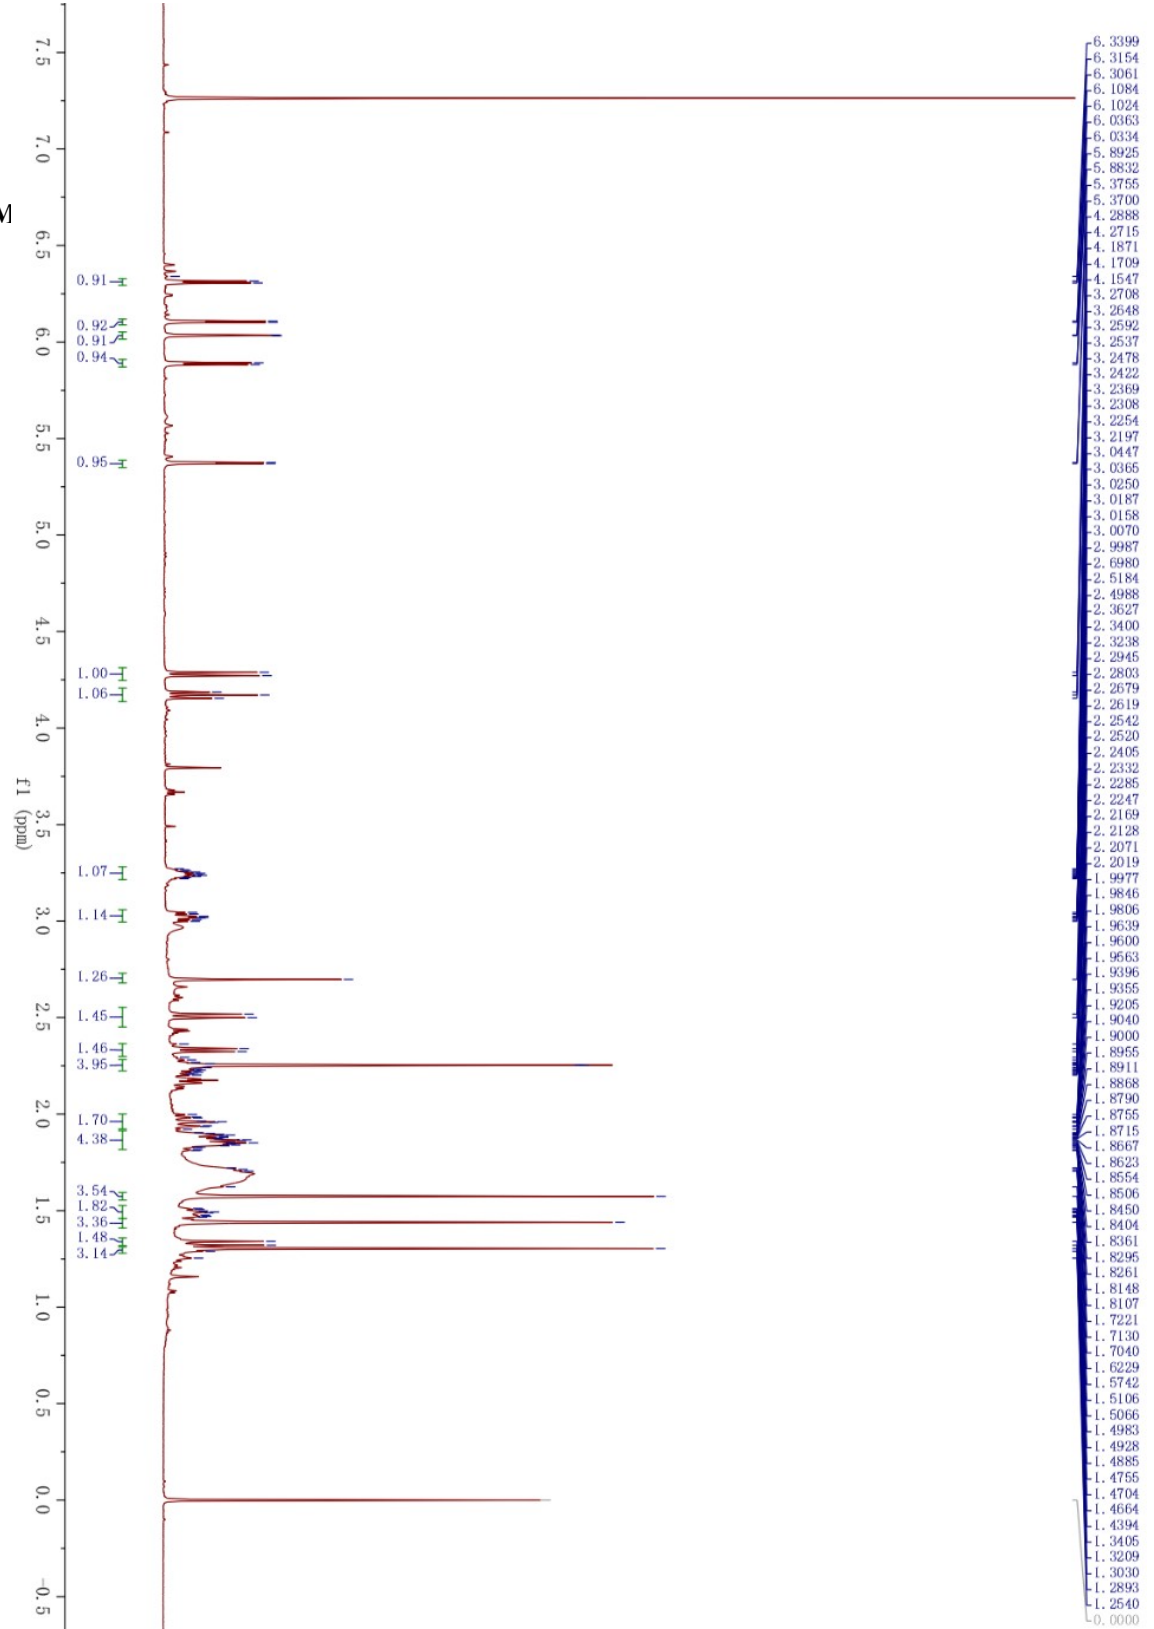

S52. <sup>13</sup>C NMR (DEPT)

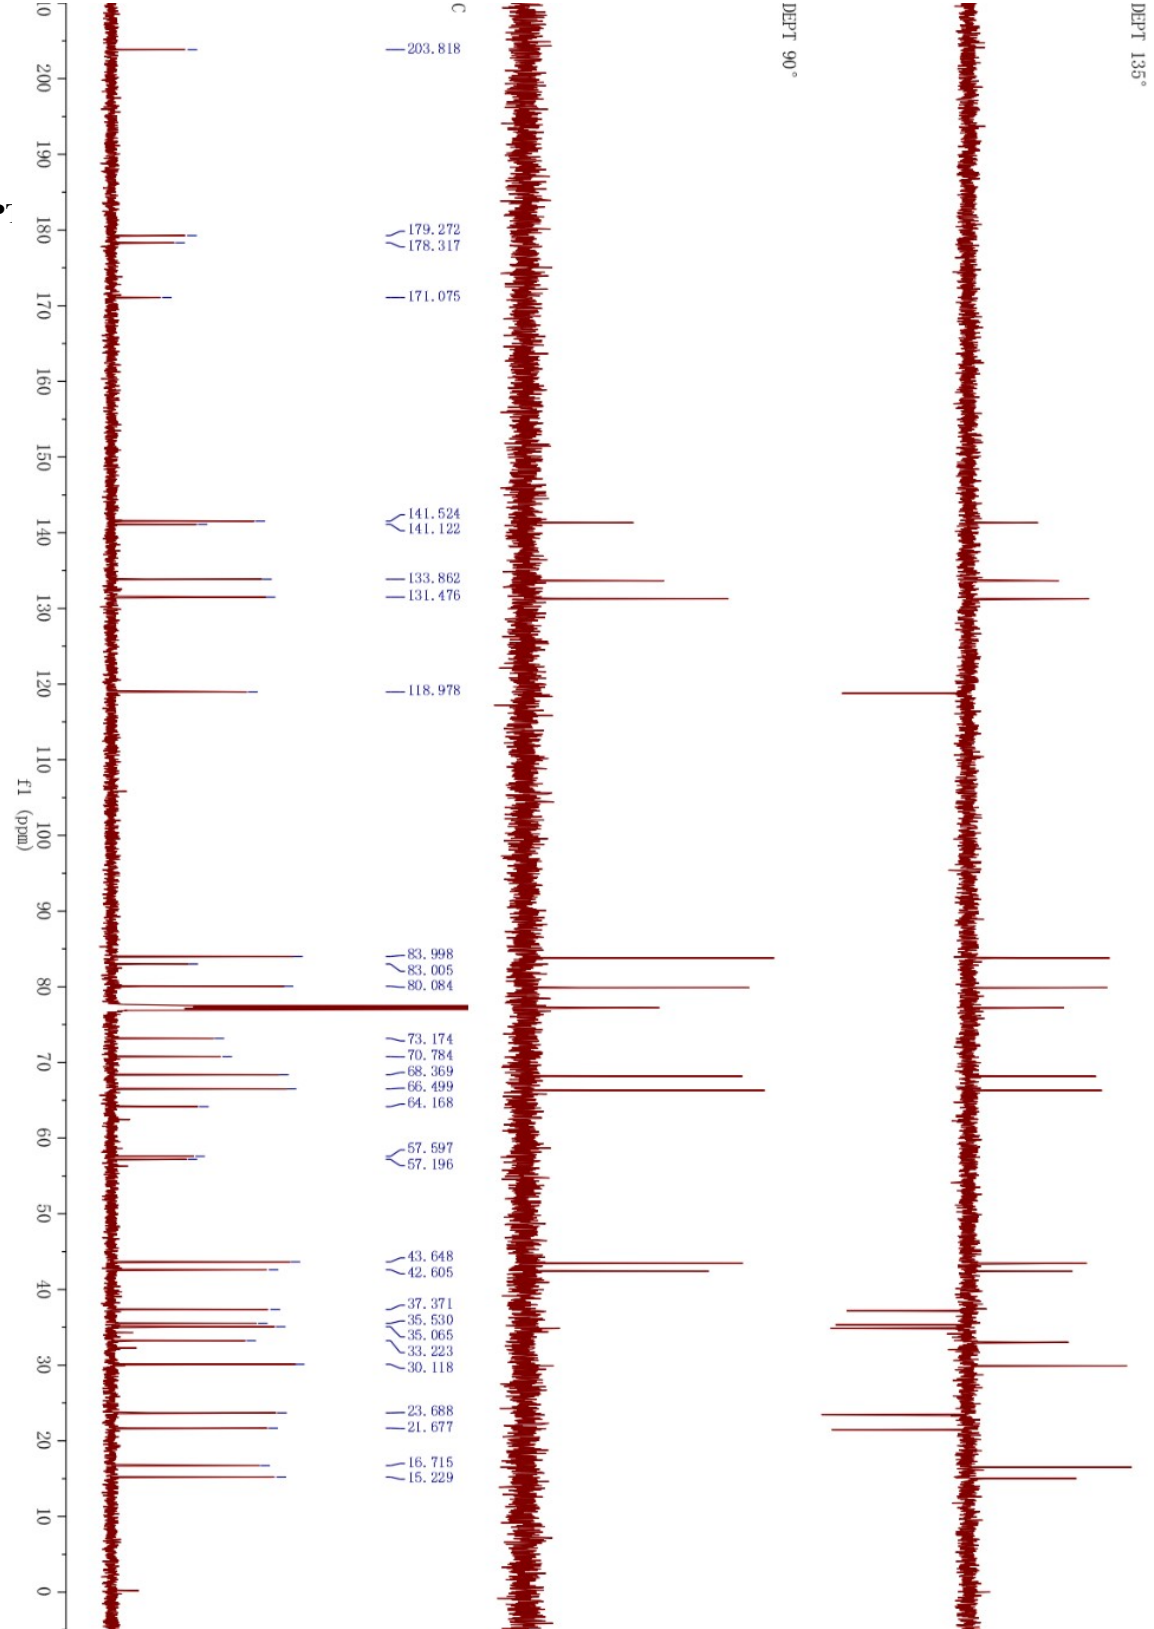

S53. <sup>1</sup>H-<sup>1</sup>H COSY (6)

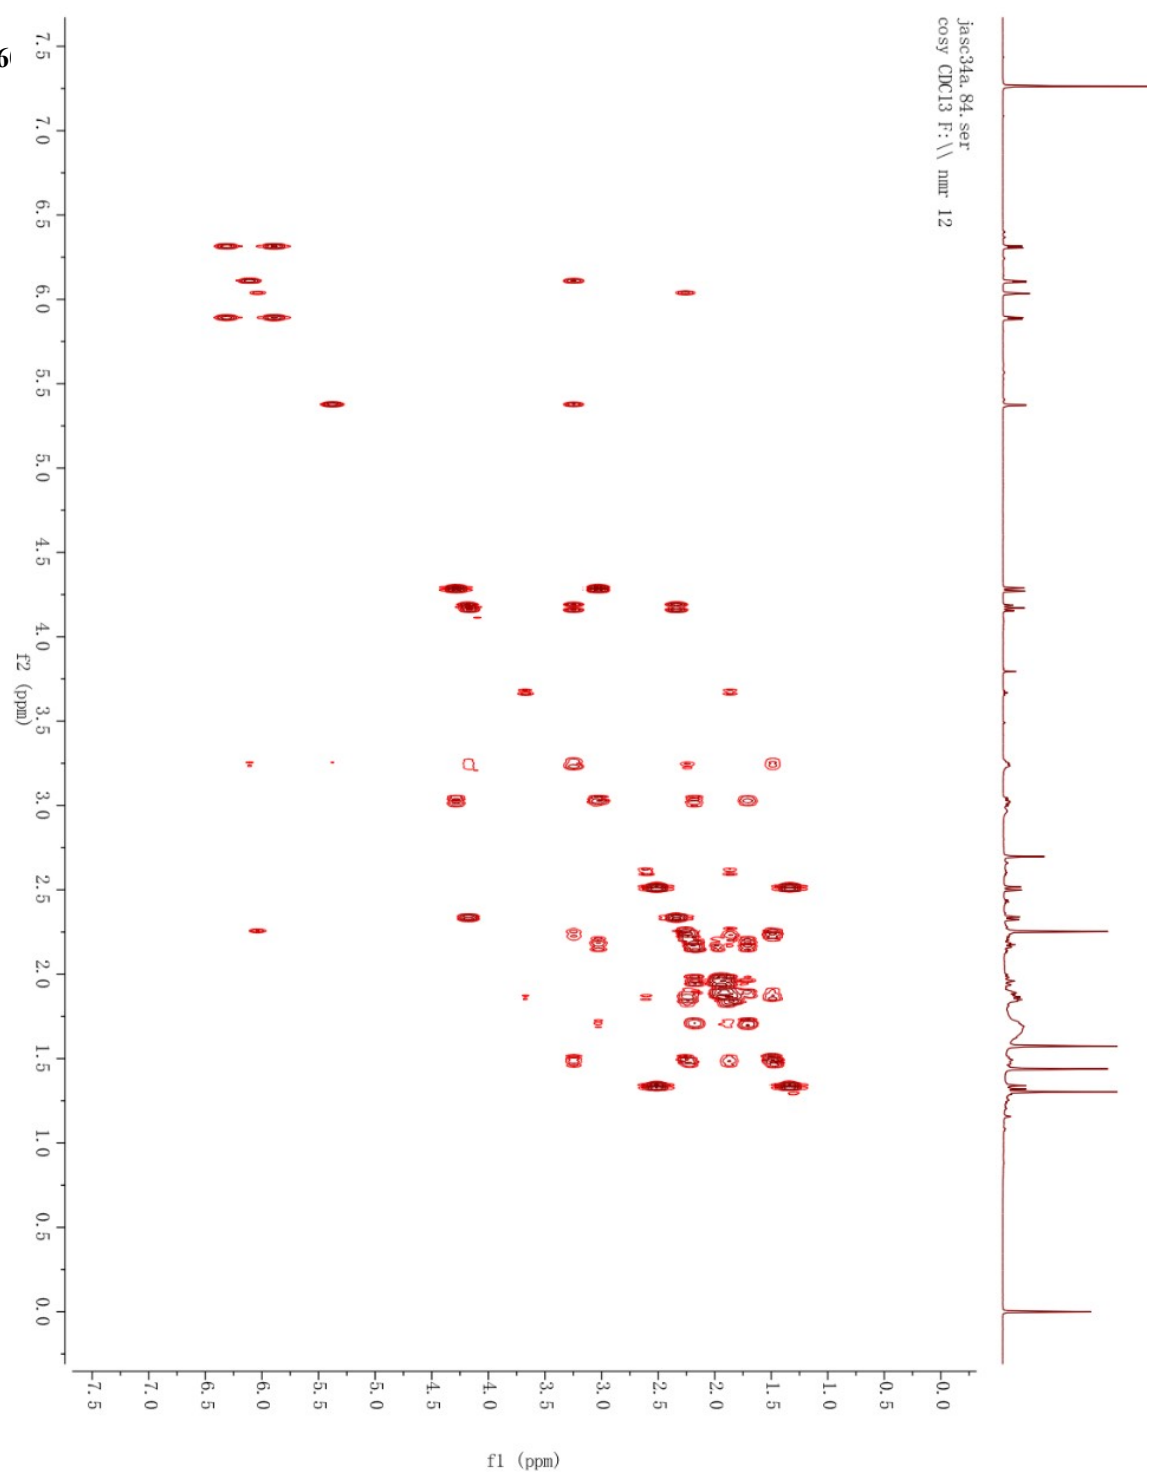

S54. HSQC spectrum

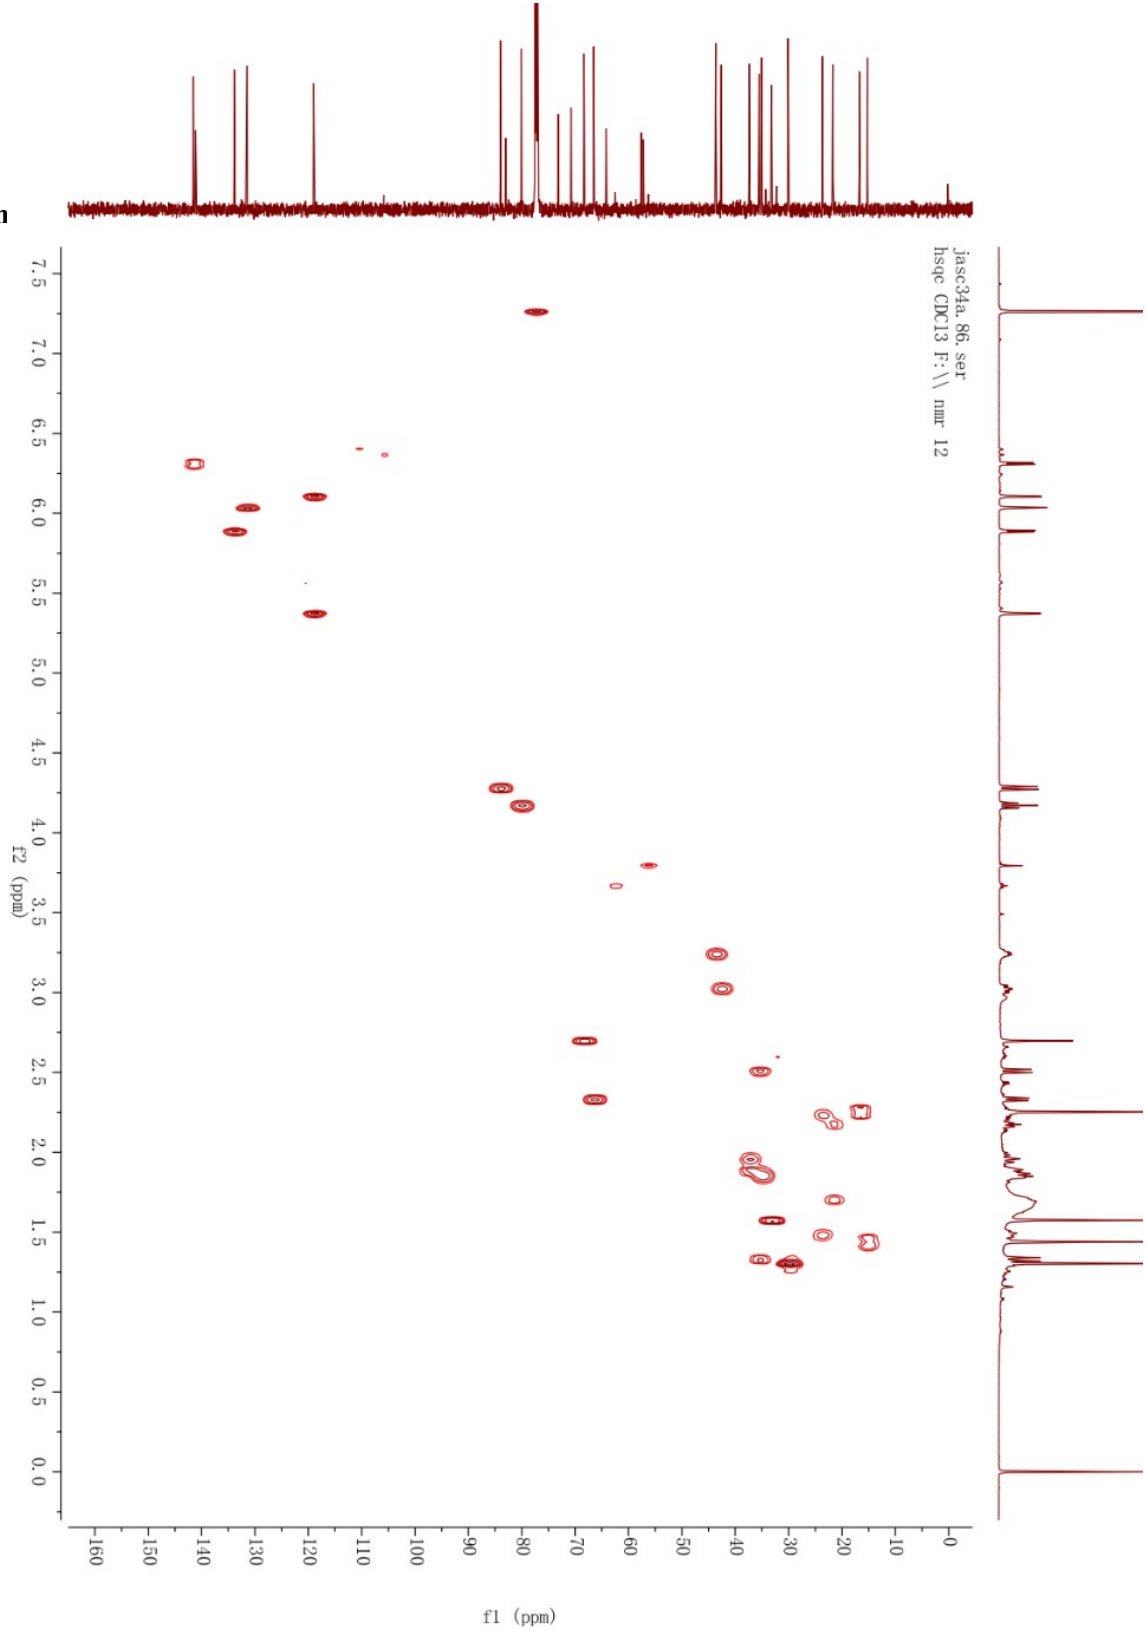

S55. HMBC spectrum

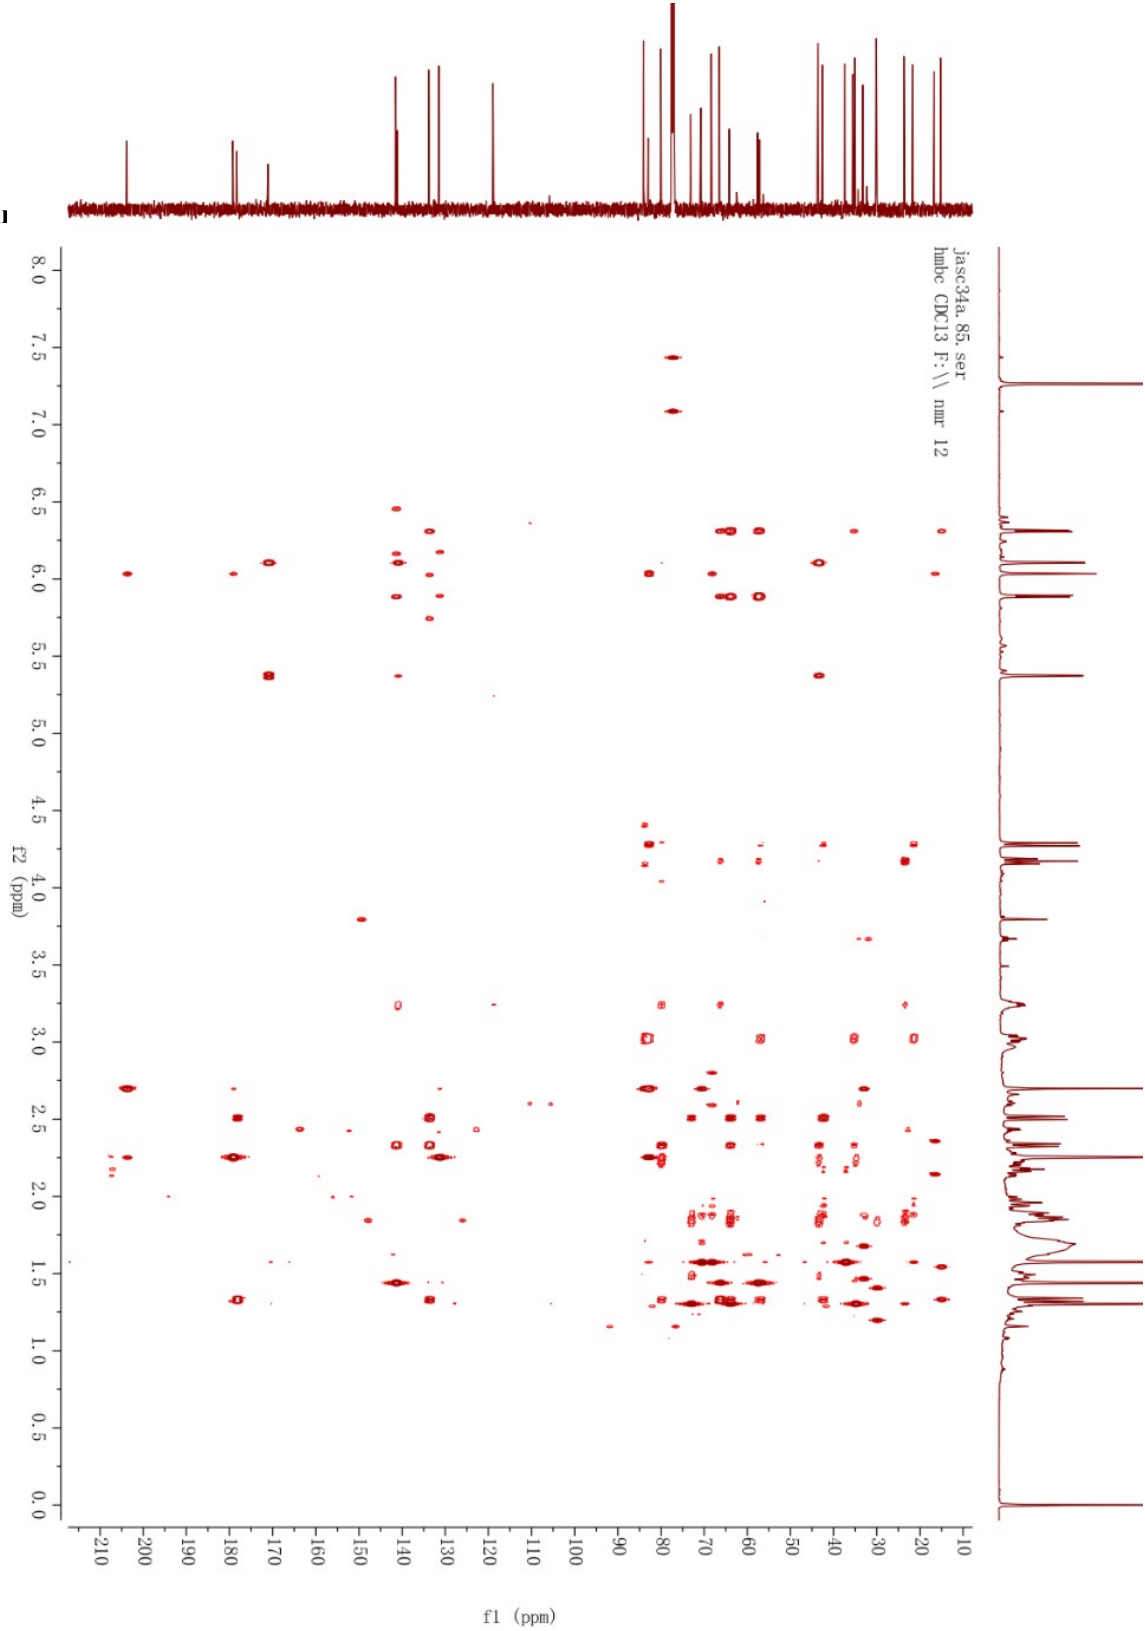



S56. ROESY spectrum

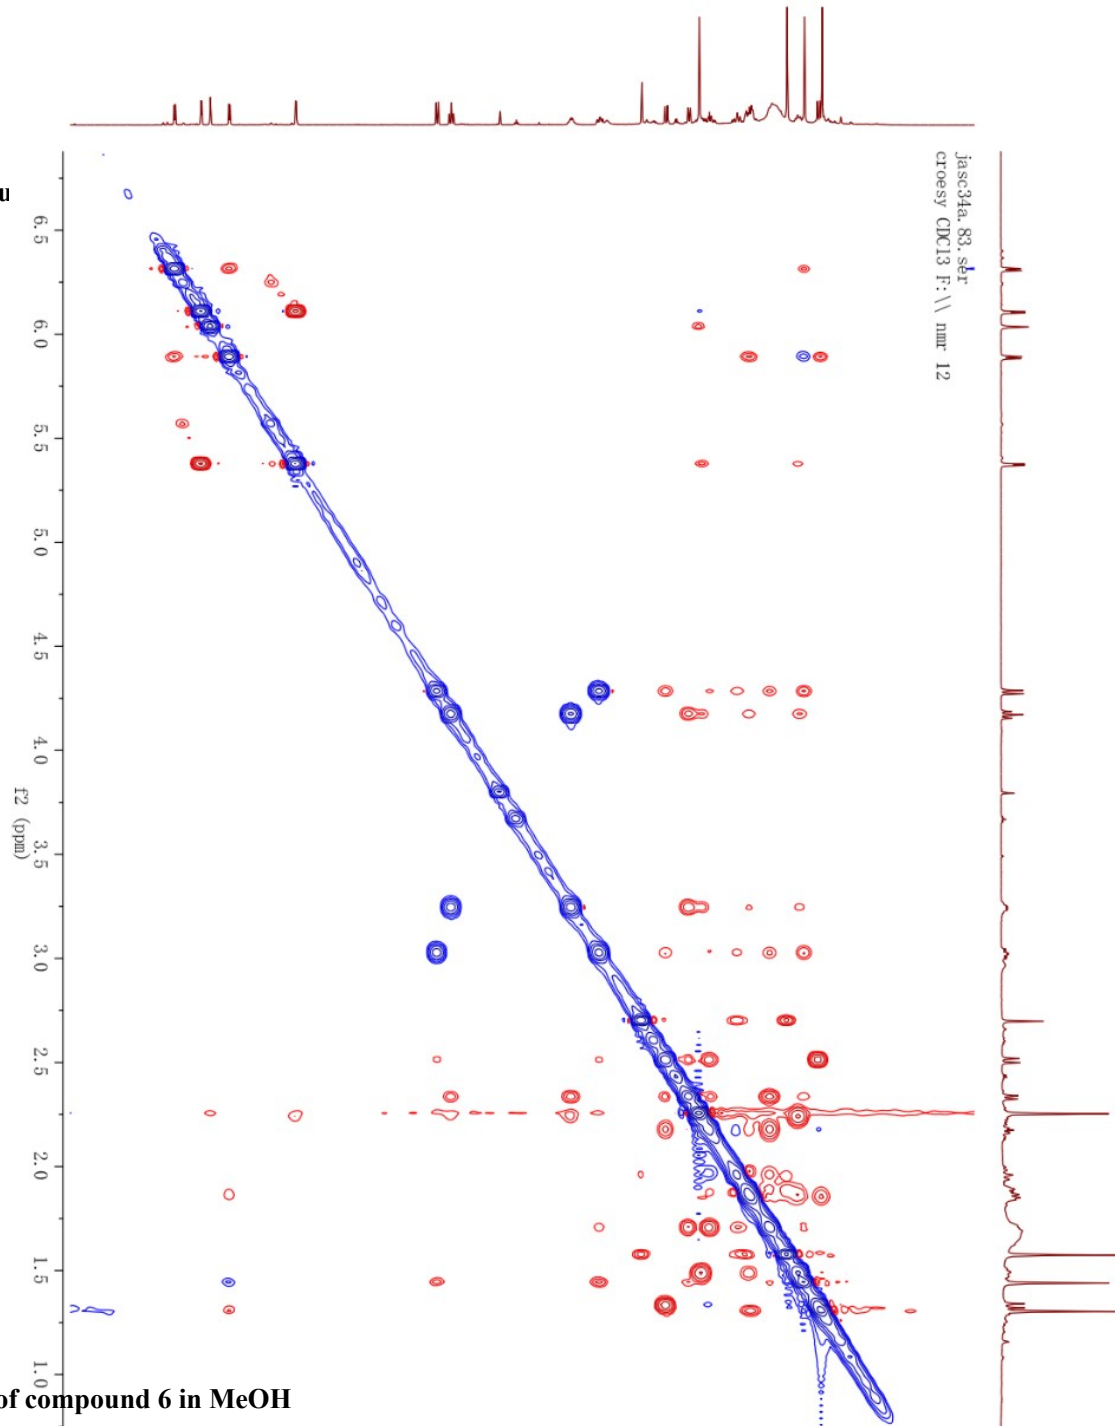

S57.  $[\alpha]_D$  spectrum of compound 6 in MeOH

**Rudolph Research Analytical**

This sample was measured on an Autopol VI, Serial #91058  
Manufactured by Rudolph Research Analytical, Hackettstown, NJ, USA.

Measurement Date : Wednesday, 11-DEC-2024

Set Temperature : 20.0

Time Delay : Disabled

Delay between Measurement : Disabled

| n | Average | Std.Dev. | % RSD  | Maximum | Minimum |
|---|---------|----------|--------|---------|---------|
| 5 | -22.04  | 2.23     | -10.11 | -20.41  | -24.49  |

| S.No | Sample ID | Time        | Result | Scale | OR °Arc | WLG.nm | Lg.mm  | Conc.g/100ml | Temp. |
|------|-----------|-------------|--------|-------|---------|--------|--------|--------------|-------|
| 1    | JASC-34   | 03:08:36 PM | -20.41 | SR    | -0.010  | 589    | 100.00 | 0.049        | 20.0  |
| 2    | JASC-34   | 03:08:43 PM | -24.49 | SR    | -0.012  | 589    | 100.00 | 0.049        | 20.0  |
| 3    | JASC-34   | 03:08:49 PM | -20.41 | SR    | -0.010  | 589    | 100.00 | 0.049        | 20.0  |
| 4    | JASC-34   | 03:08:55 PM | -24.49 | SR    | -0.012  | 589    | 100.00 | 0.049        | 20.0  |
| 5    | JASC-34   | 03:09:02 PM | -20.41 | SR    | -0.010  | 589    | 100.00 | 0.049        | 20.0  |

### S58. IR spectrum of compound 6

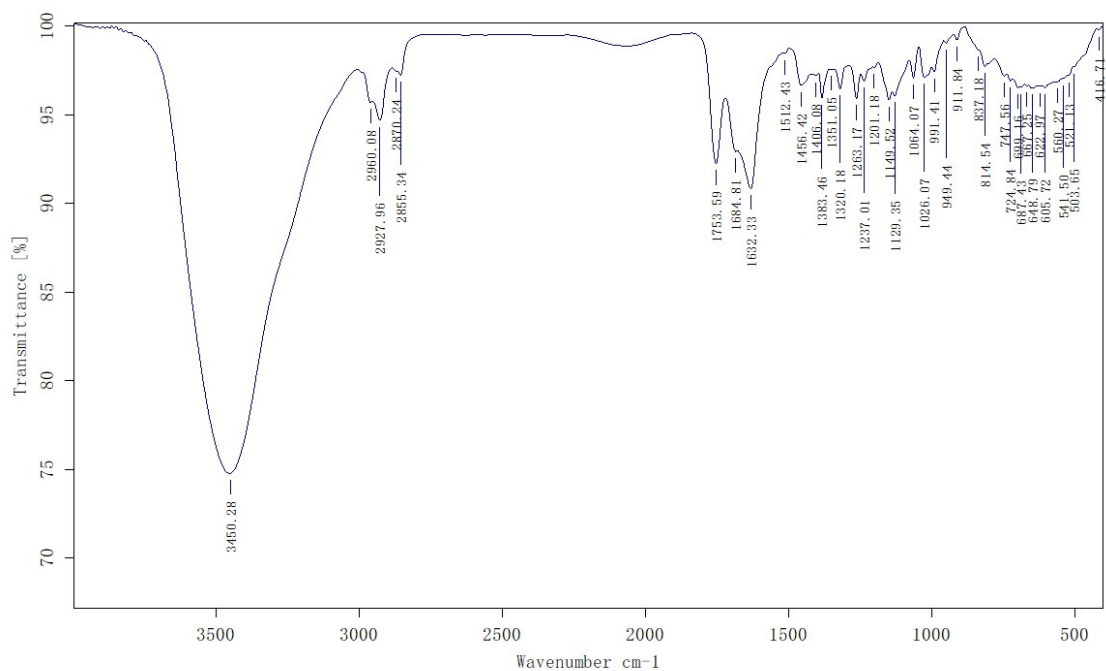

Sample Name: jasc-34

Sample Form: KBr

Path of File: E:\data

Date of Measurement: 2025/1/2

Resolution: 4

Aperture Setting: 6 mm

Number of Background Scans: 16

Number of Sample Scans: 16

Beamsplitter Setting: KBr

Source Setting: MIR

Instrument Type: BRUKER VERTEX 70

Soft Version: OPUS8.1

S59. ECD and UV spectra of compound 6

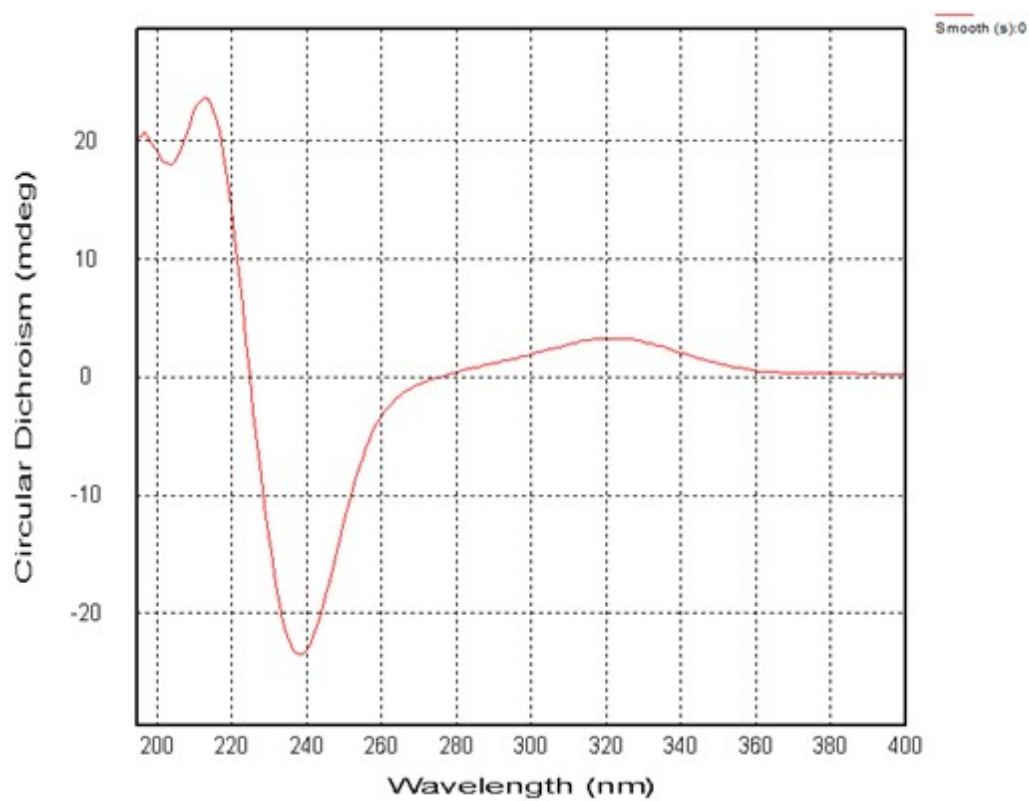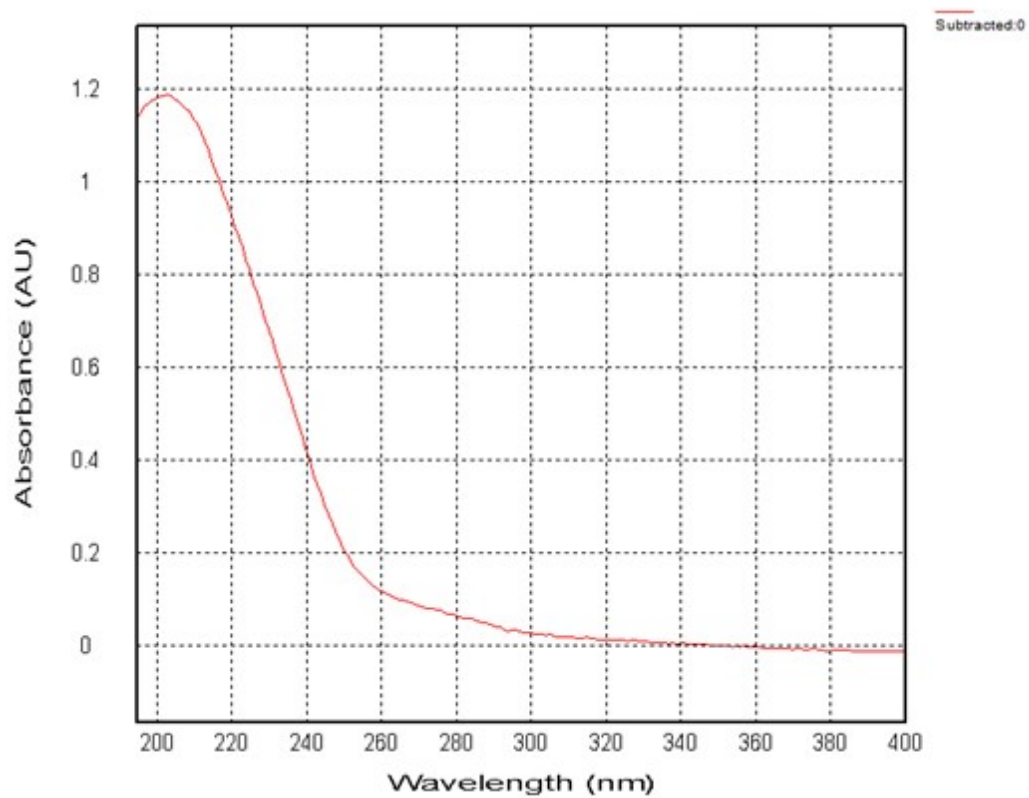

## S60. HRESIMS of compound 6

| Elmt | Val. | Min | Max | Elmt | Val. | Min | Max | Use Adduct |
|------|------|-----|-----|------|------|-----|-----|------------|
| H    | 1    | 0   | 300 | O    | 2    | 0   | 20  | H          |
| C    | 4    | 0   | 150 | Cl   | 1    | 0   | 0   | Na         |
| N    | 3    | 0   | 1   |      |      |     |     |            |

Error Margin (ppm): 100  
 HC Ratio: unlimited  
 Max Isotopes: all  
 MSn Iso RI (%): 75.00

DBE Range: -2.0 - 1000.0  
 Apply N Rule: yes  
 Isotope RI (%): 1.00  
 MSn Logic Mode: AND

Electron Ions: both  
 Use MSn Info: no  
 Isotope Res: 10000  
 Max Results: 500

Event#: 1 MS(E+) Ret. Time : 12.847 Scan#: 1928

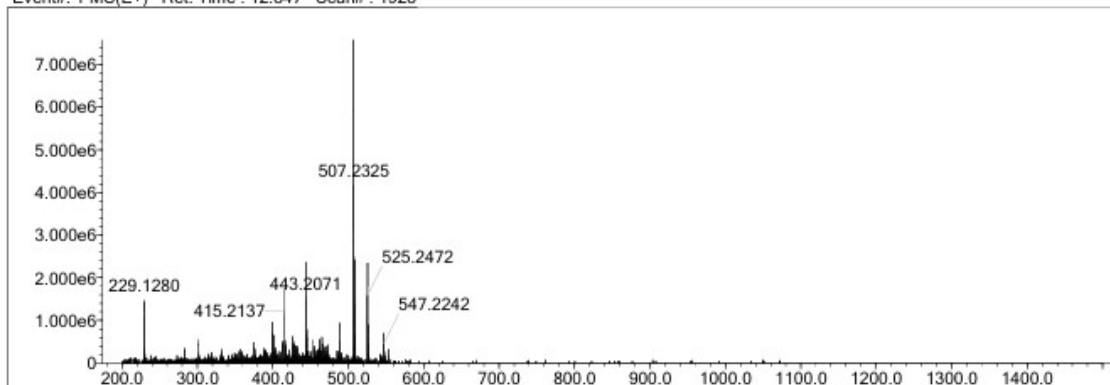

Measured region for 525.2472 m/z

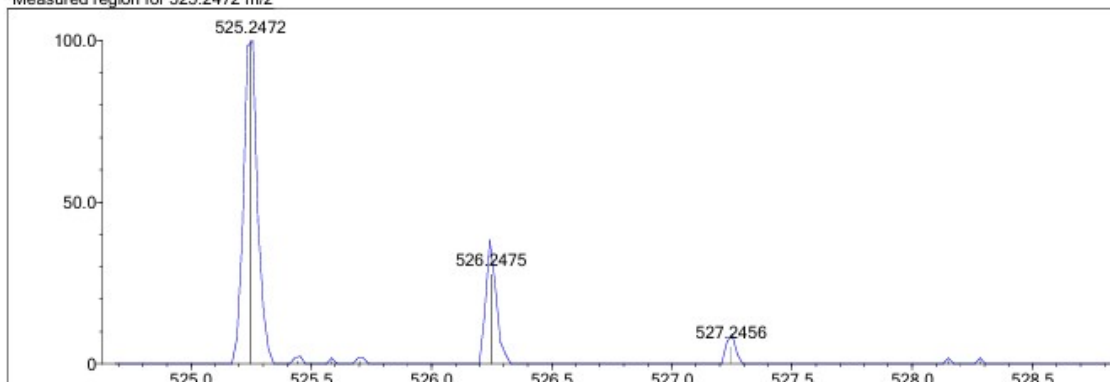

C30 H36 O8 [M+H]<sup>+</sup> : Predicted region for 525.2483 m/z

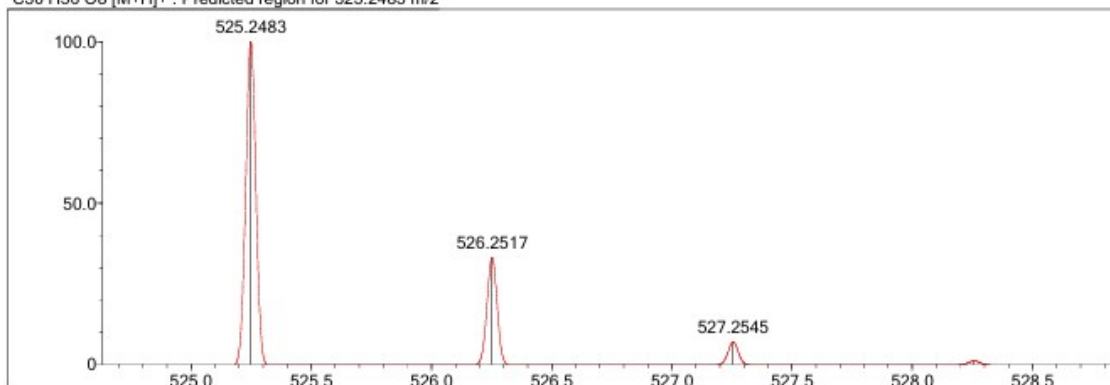

| Rank | Score | Formula (M) | Ion                | Meas. m/z | Pred. m/z | Df. (mDa) | Df. (ppm) | Iso   | DBE  |
|------|-------|-------------|--------------------|-----------|-----------|-----------|-----------|-------|------|
| 1    | 80.29 | C30 H36 O8  | [M+H] <sup>+</sup> | 525.2472  | 525.2483  | -1.1      | -2.09     | 82.54 | 13.0 |

S61. <sup>1</sup>H NMR (600 M

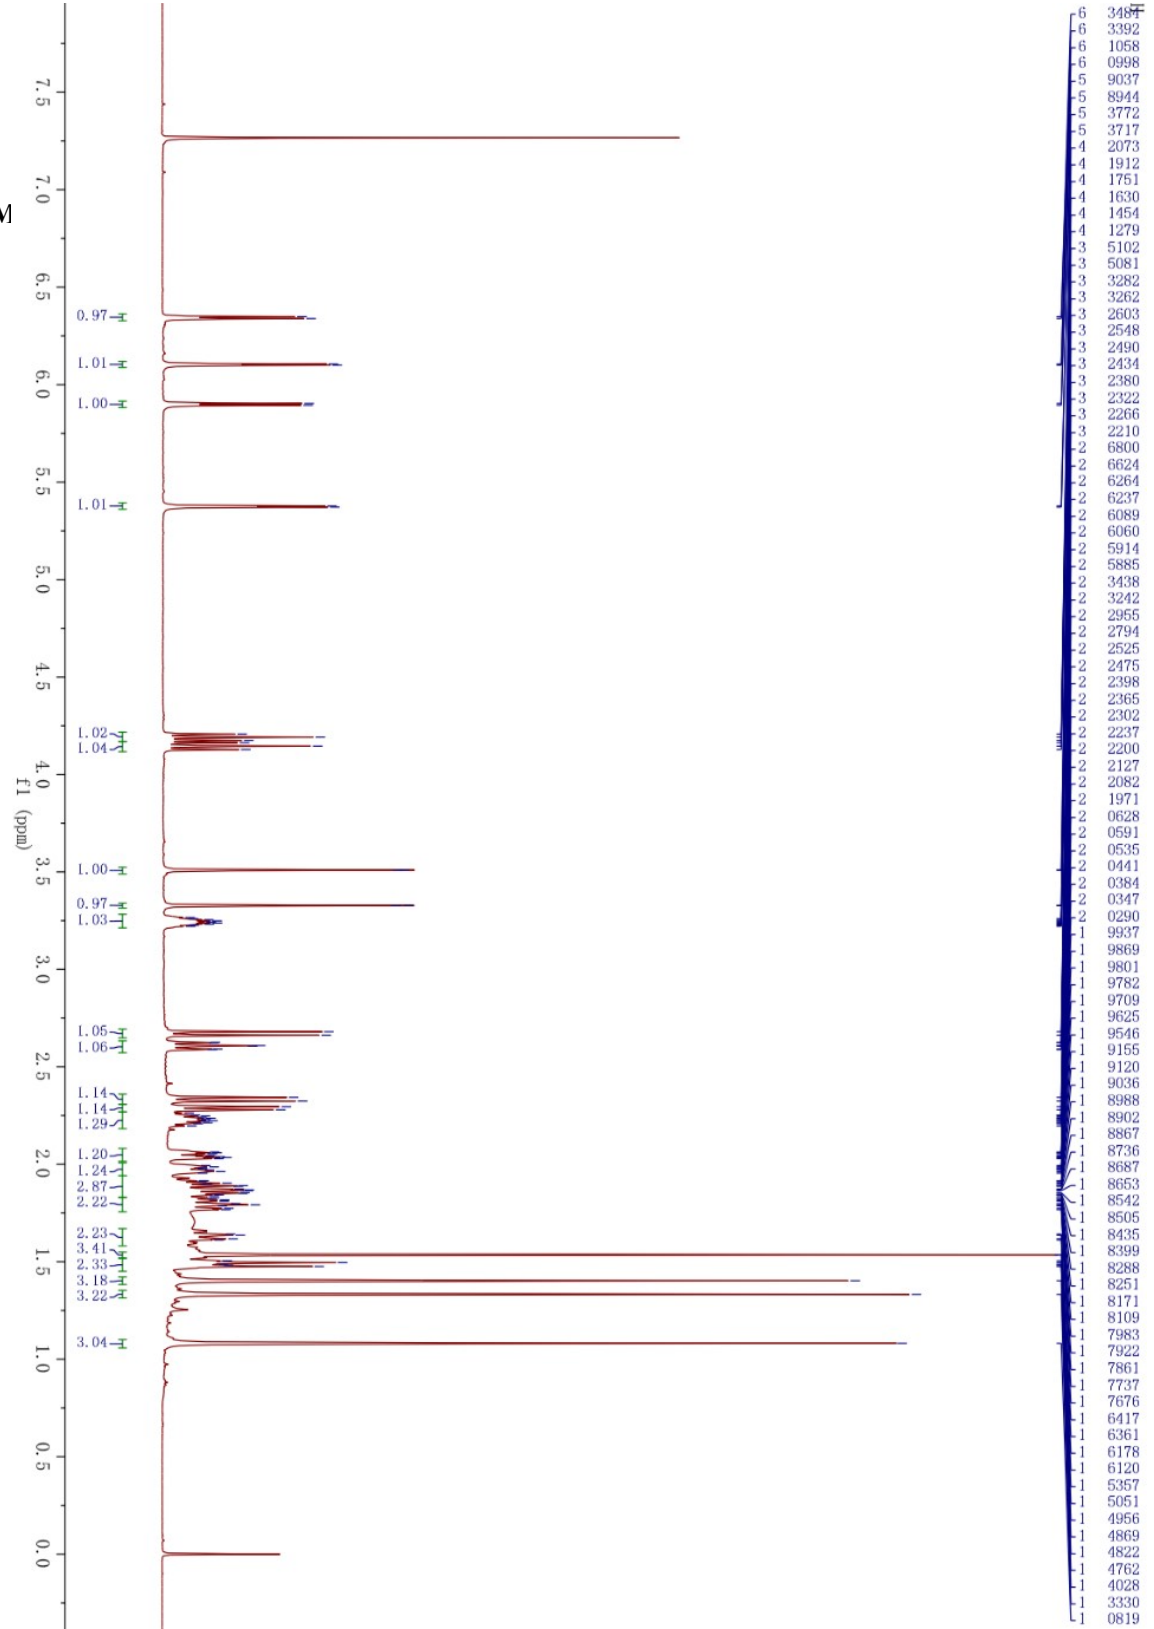

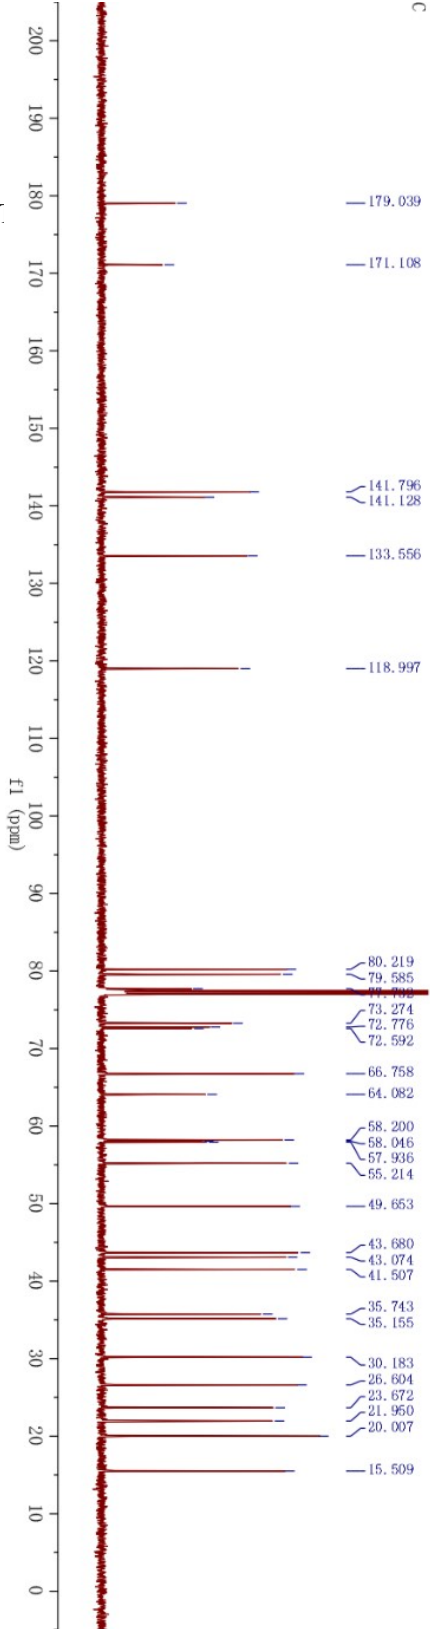

S63. <sup>1</sup>H-<sup>1</sup>H COSY (6)

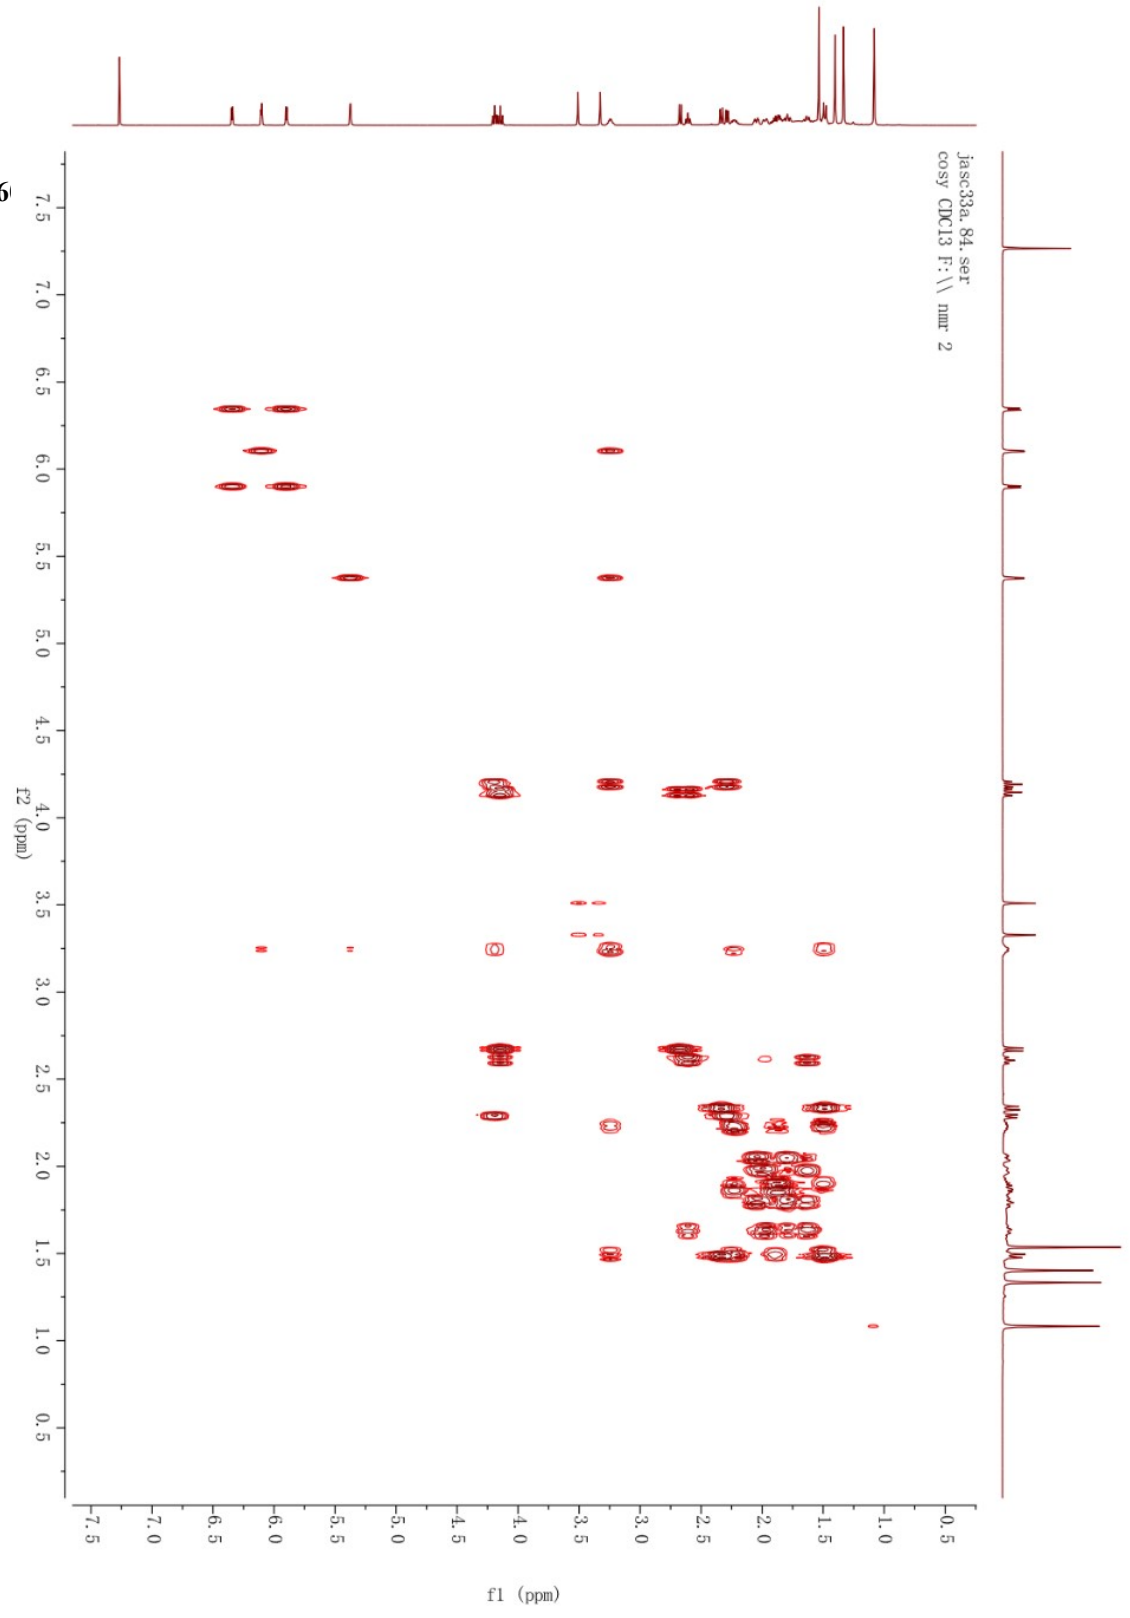

S64. HSQC spectrum

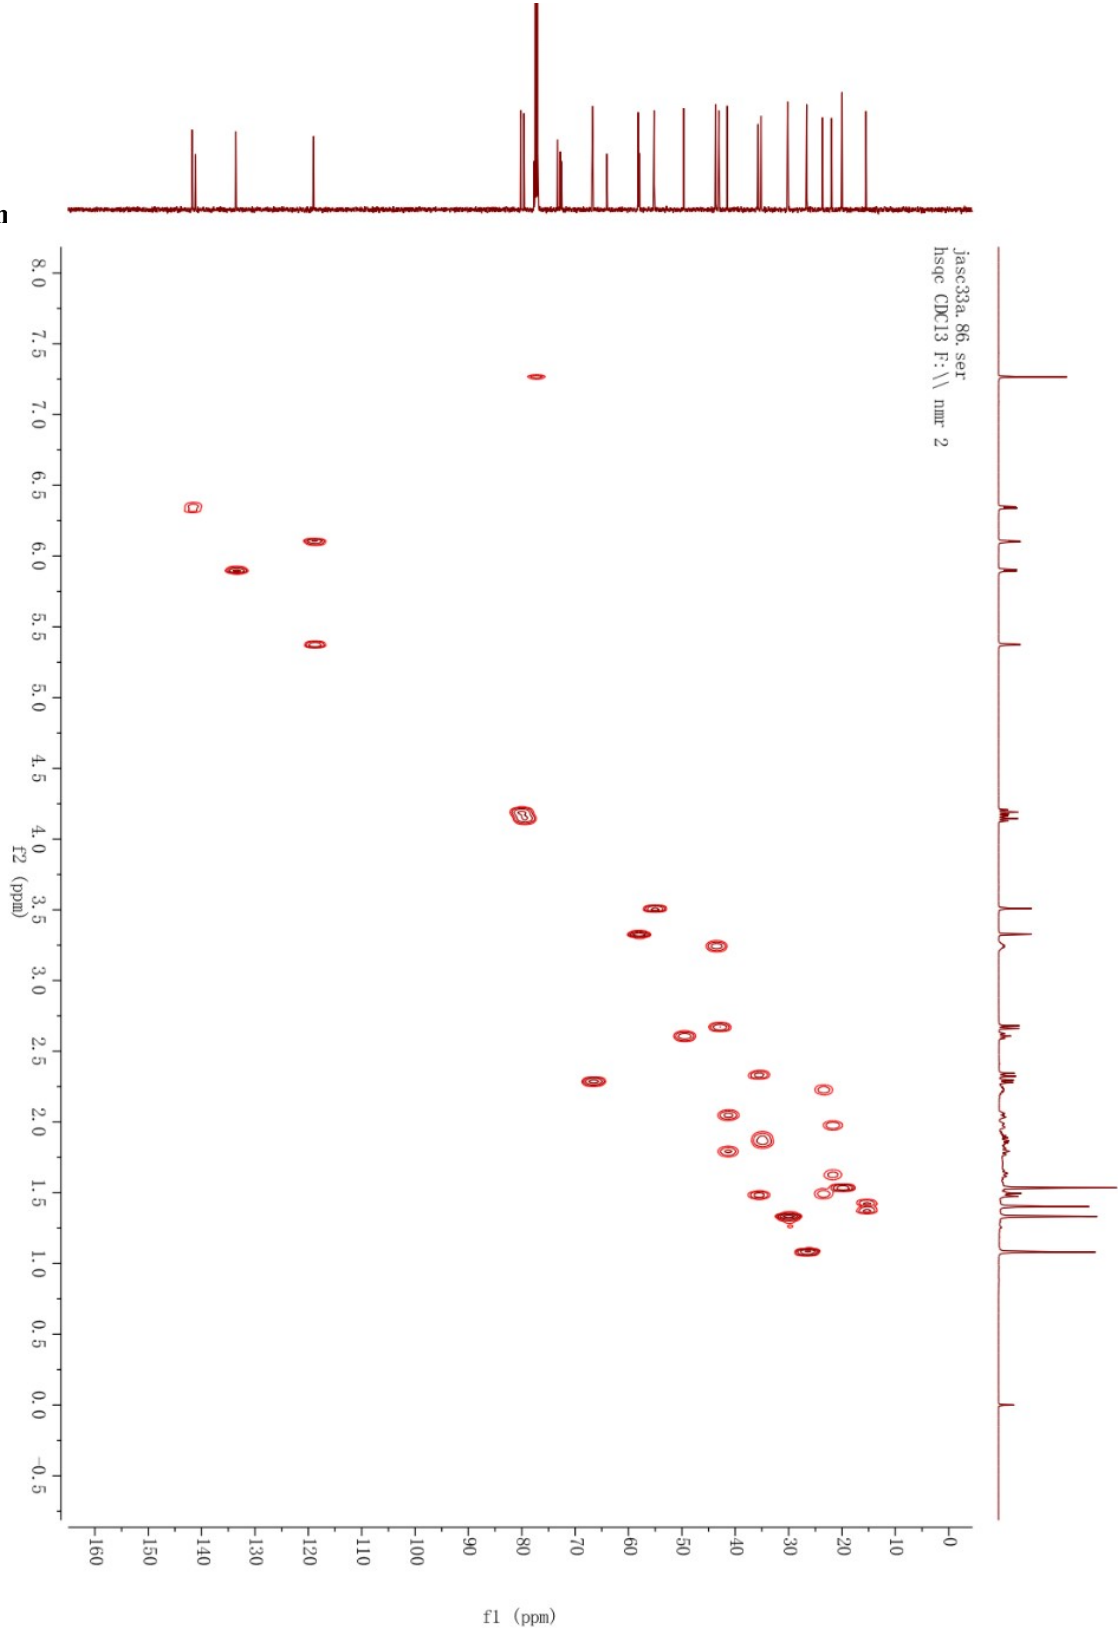



S65. HMBC spectrum

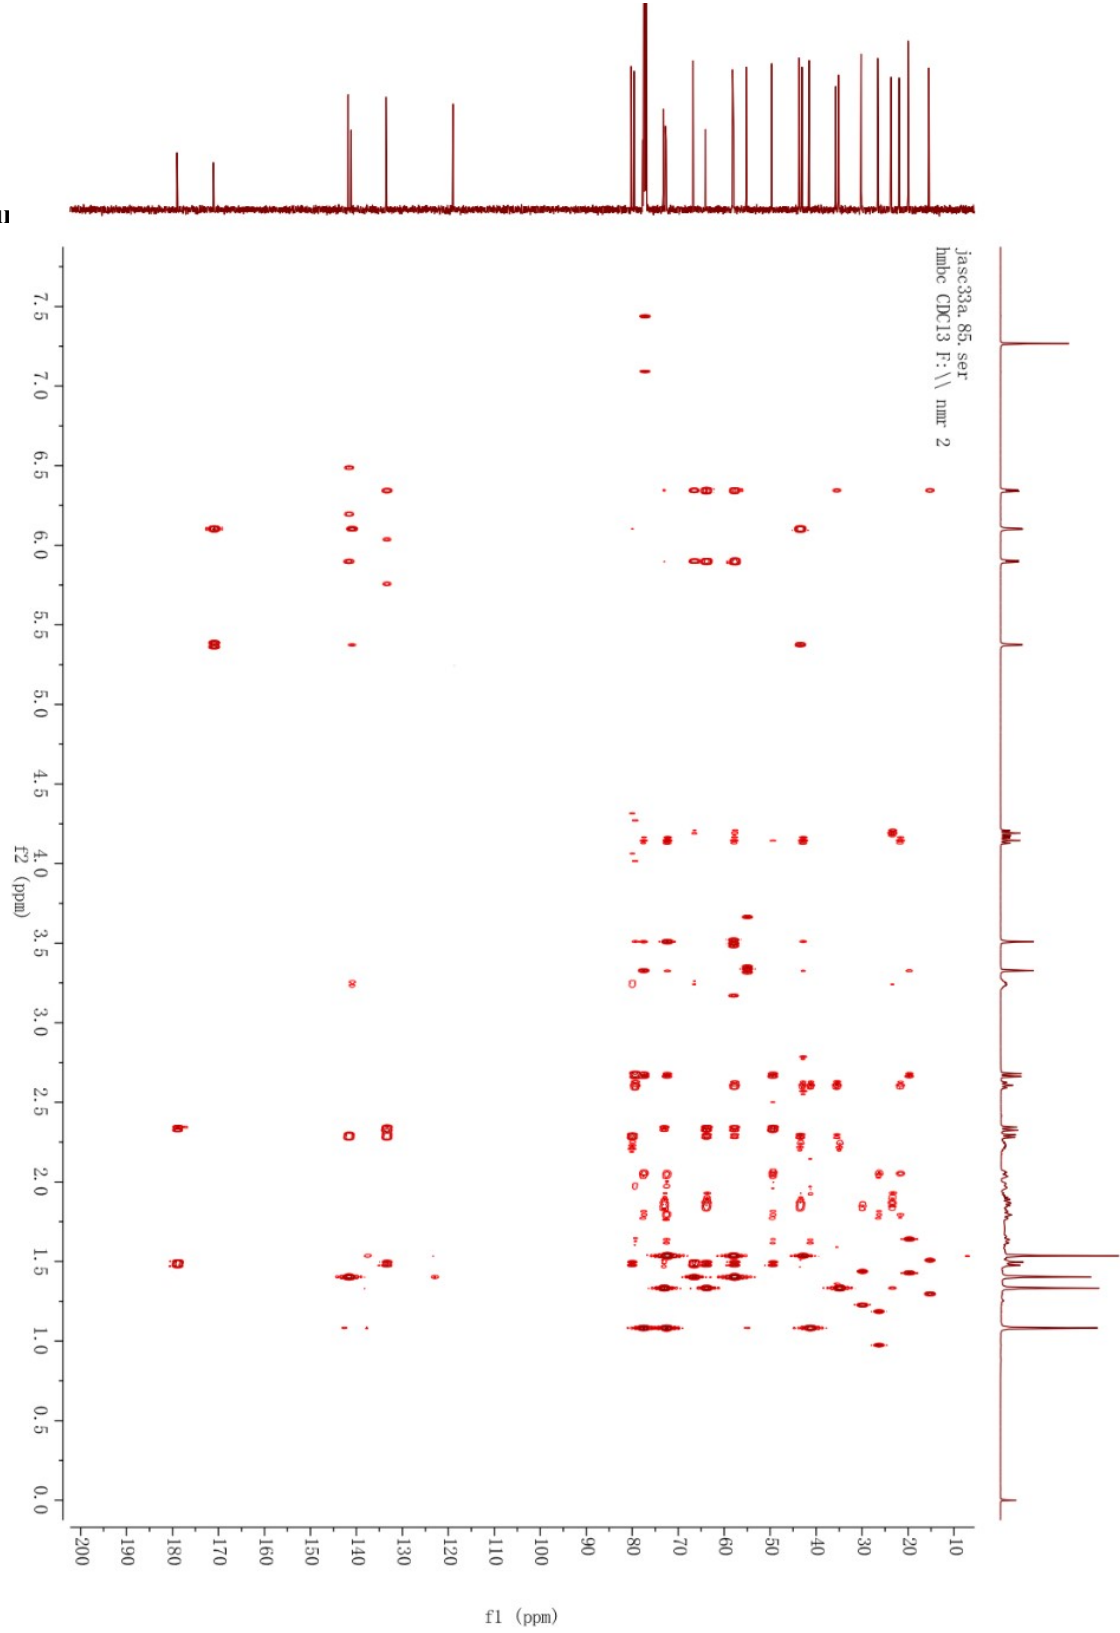

S66. ROESY spectrum

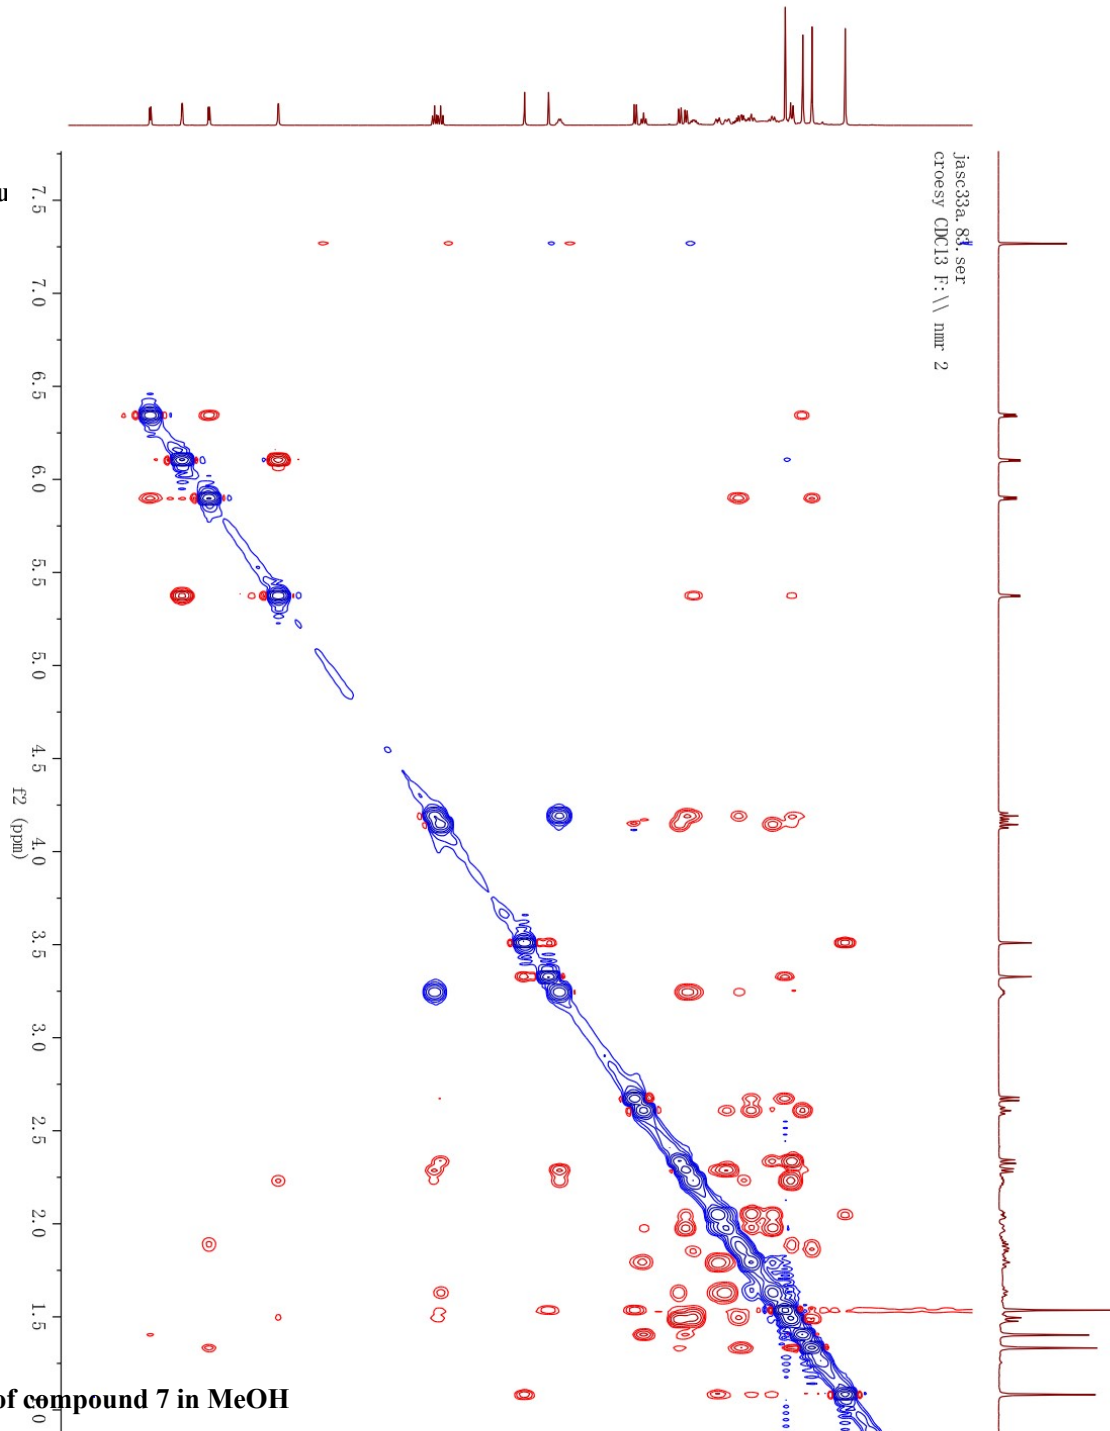

S67.  $[\alpha]_D$  spectrum of compound 7 in MeOH

**Rudolph Research Analytical**

This sample was measured on an Autopol VI, Serial #91058  
 Manufactured by Rudolph Research Analytical, Hackettstown, NJ, USA.

Measurement Date : Wednesday, 11-DEC-2024

Set Temperature : 20.0

Time Delay : Disabled

Delay between Measurement : Disabled

| <u>n</u> | <u>Average</u> | <u>Std.Dev.</u> | <u>% RSD</u> | <u>Maximum</u> | <u>Minimum</u> |
|----------|----------------|-----------------|--------------|----------------|----------------|
| 5        | 123.64         | 1.09            | 0.88         | 124.68         | 122.08         |

| <u>S.No</u> | <u>Sample ID</u> | <u>Time</u> | <u>Result</u> | <u>Scale</u> | <u>OR °Arc</u> | <u>WLG.nm</u> | <u>Lq.mm</u> | <u>Conc.g/100ml</u> | <u>Temp.</u> |
|-------------|------------------|-------------|---------------|--------------|----------------|---------------|--------------|---------------------|--------------|
| 1           | JASC-33          | 02:58:32 PM | 123.38        | SR           | 0.095          | 589           | 100.00       | 0.077               | 20.0         |
| 2           | JASC-33          | 02:58:39 PM | 123.38        | SR           | 0.095          | 589           | 100.00       | 0.077               | 20.0         |
| 3           | JASC-33          | 02:58:45 PM | 124.68        | SR           | 0.096          | 589           | 100.00       | 0.077               | 20.0         |
| 4           | JASC-33          | 02:58:51 PM | 122.08        | SR           | 0.094          | 589           | 100.00       | 0.077               | 20.0         |
| 5           | JASC-33          | 02:58:58 PM | 124.68        | SR           | 0.096          | 589           | 100.00       | 0.077               | 20.0         |

### S68. IR spectrum of compound 7

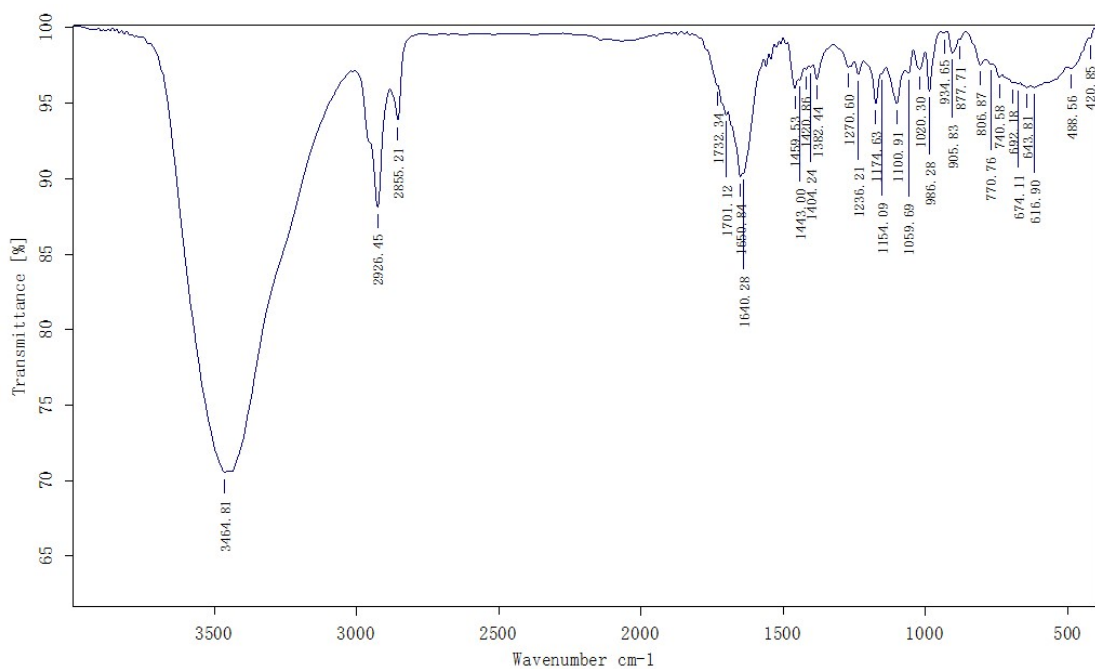

Sample Name: jasc-33  
Sample Form: KBr  
Path of File: E:\data  
Date of Measurement: 2024/12/31

Resolution: 4  
Aperture Setting: 6 mm  
Number of Background Scans: 16  
Number of Sample Scans: 16

Beamsplitter Setting: KBr  
Source Setting: MIR  
Instrument Type: BRUKER VERTEX 70  
Soft Version: OPUS8.1

S69. ECD and UV spectra of compound 7

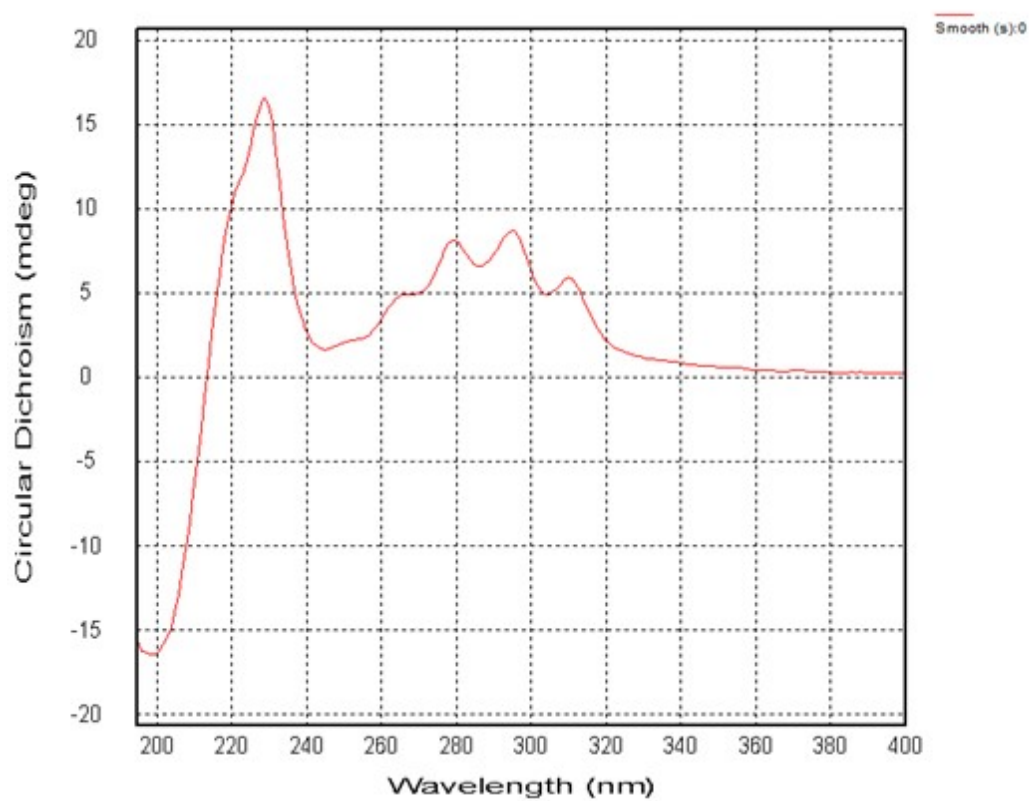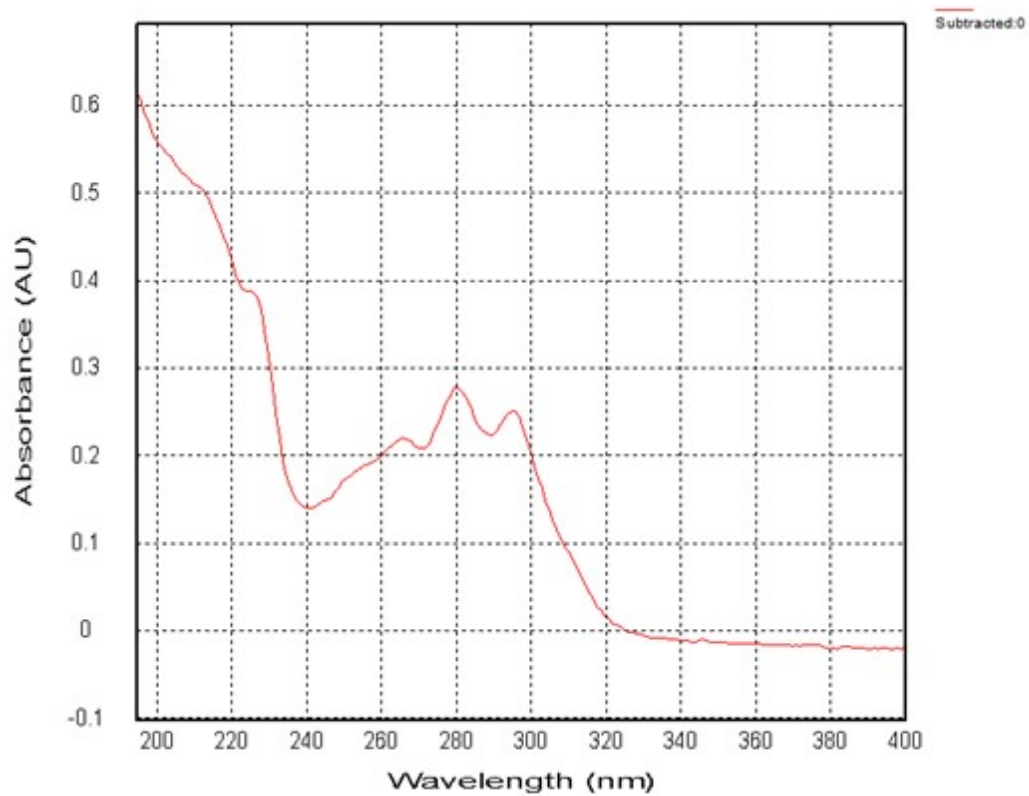

## S70. HRESIMS of compound 7

| Elmt | Val. | Min | Max | Elmt | Val. | Min | Max | Use Adduct |
|------|------|-----|-----|------|------|-----|-----|------------|
| H    | 1    | 0   | 300 | O    | 2    | 0   | 20  | H          |
| C    | 4    | 0   | 150 | Cl   | 1    | 0   | 0   | Na         |
| N    | 3    | 0   | 1   |      |      |     |     |            |

Error Margin (ppm): 100  
 HC Ratio: unlimited  
 Max Isotopes: all  
 MSn Iso RI (%): 75.00

DBE Range: -2.0 - 1000.0  
 Apply N Rule: yes  
 Isotope RI (%): 1.00  
 MSn Logic Mode: AND

Electron Ions: both  
 Use MSn Info: no  
 Isotope Res: 10000  
 Max Results: 500

Event#: 1 MS(E+) Ret. Time : 11.033 Scan#: 1653

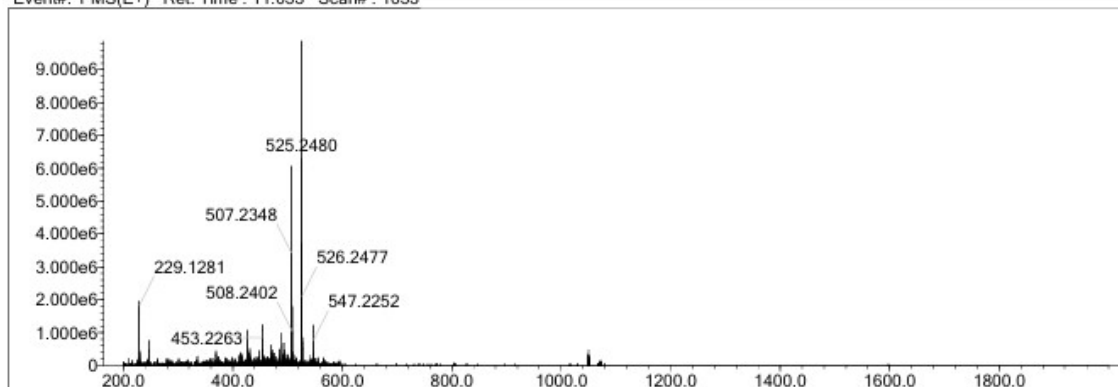

Measured region for 525.2480 m/z

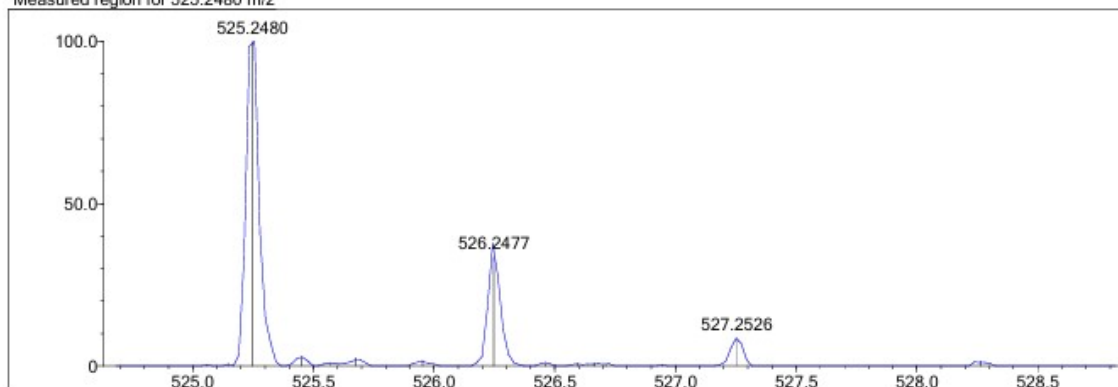

C30 H36 O8 [M+H]<sup>+</sup> : Predicted region for 525.2483 m/z

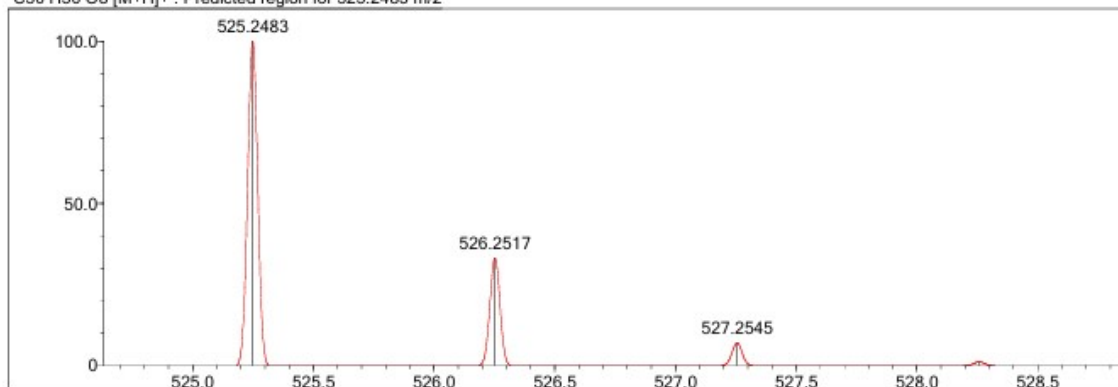

| Rank | Score | Formula (M) | Ion                | Meas. m/z | Pred. m/z | Df. (mDa) | Df. (ppm) | Iso   | DBE  |
|------|-------|-------------|--------------------|-----------|-----------|-----------|-----------|-------|------|
| 1    | 86.27 | C30 H36 O8  | [M+H] <sup>+</sup> | 525.2480  | 525.2483  | -0.3      | -0.57     | 86.27 | 13.0 |

S71. <sup>1</sup>H NMR (600 M)

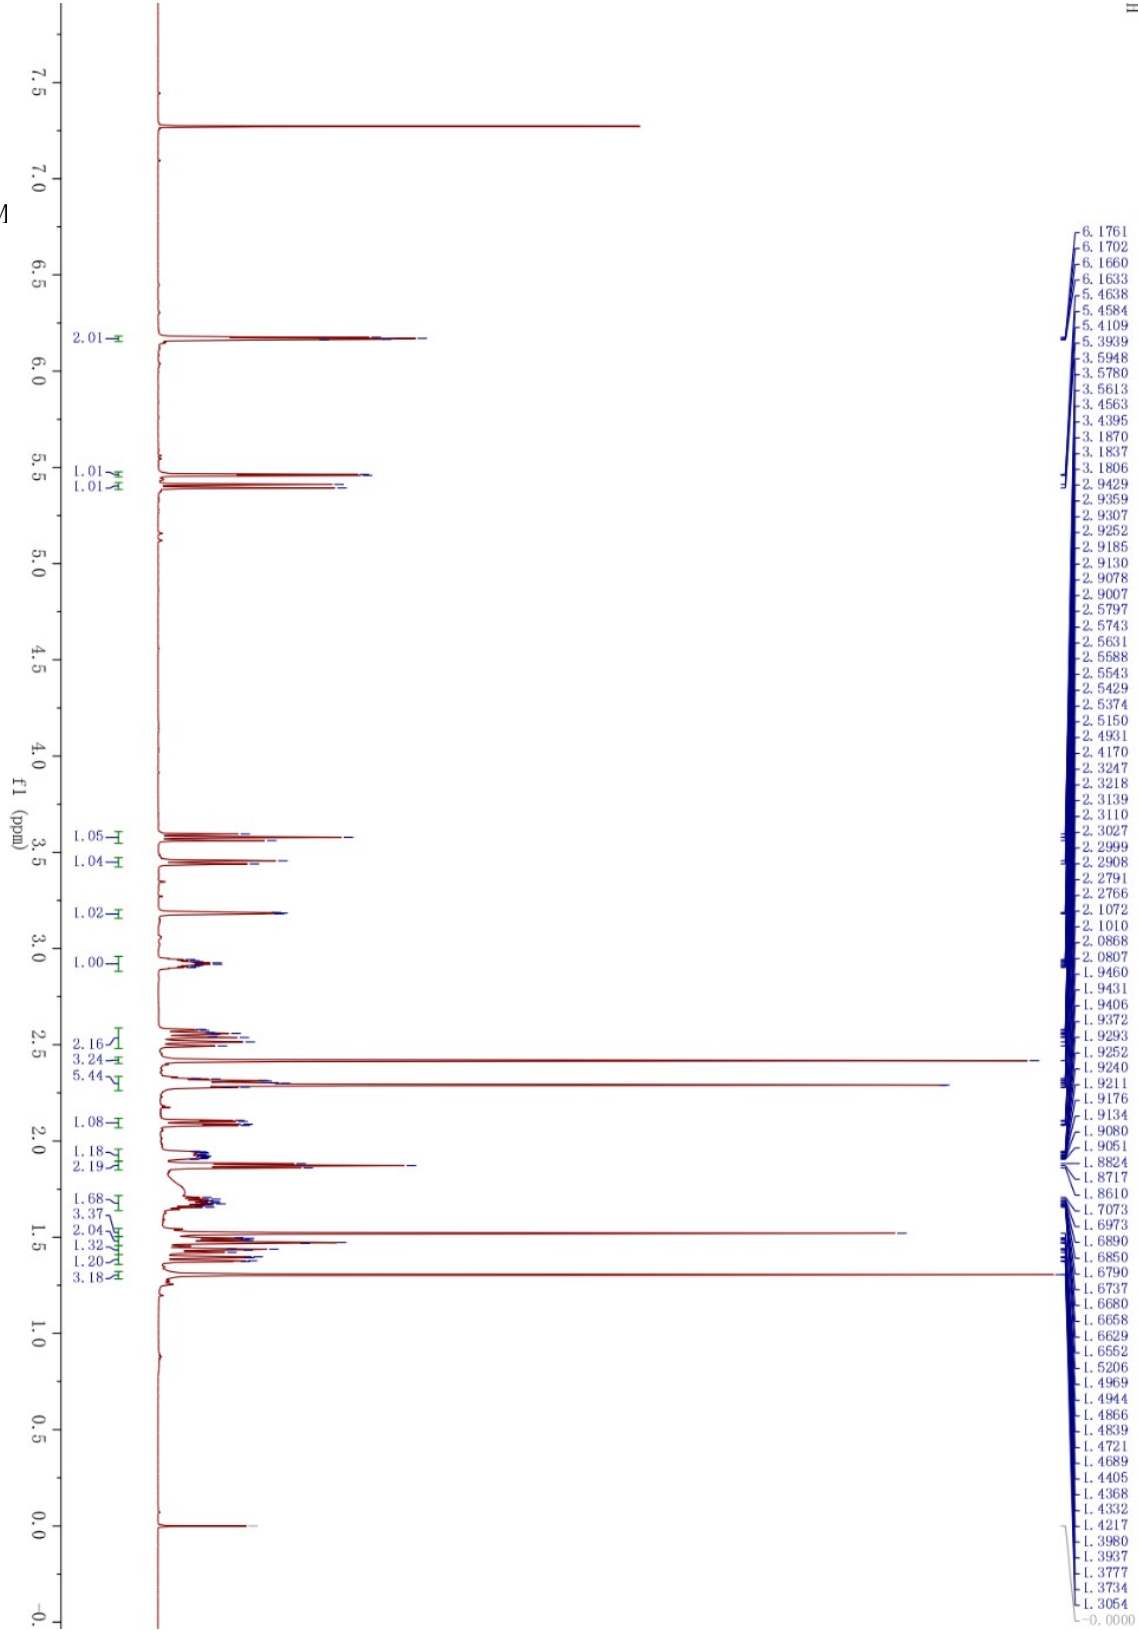

S72. <sup>13</sup>C NMR (DEPT)

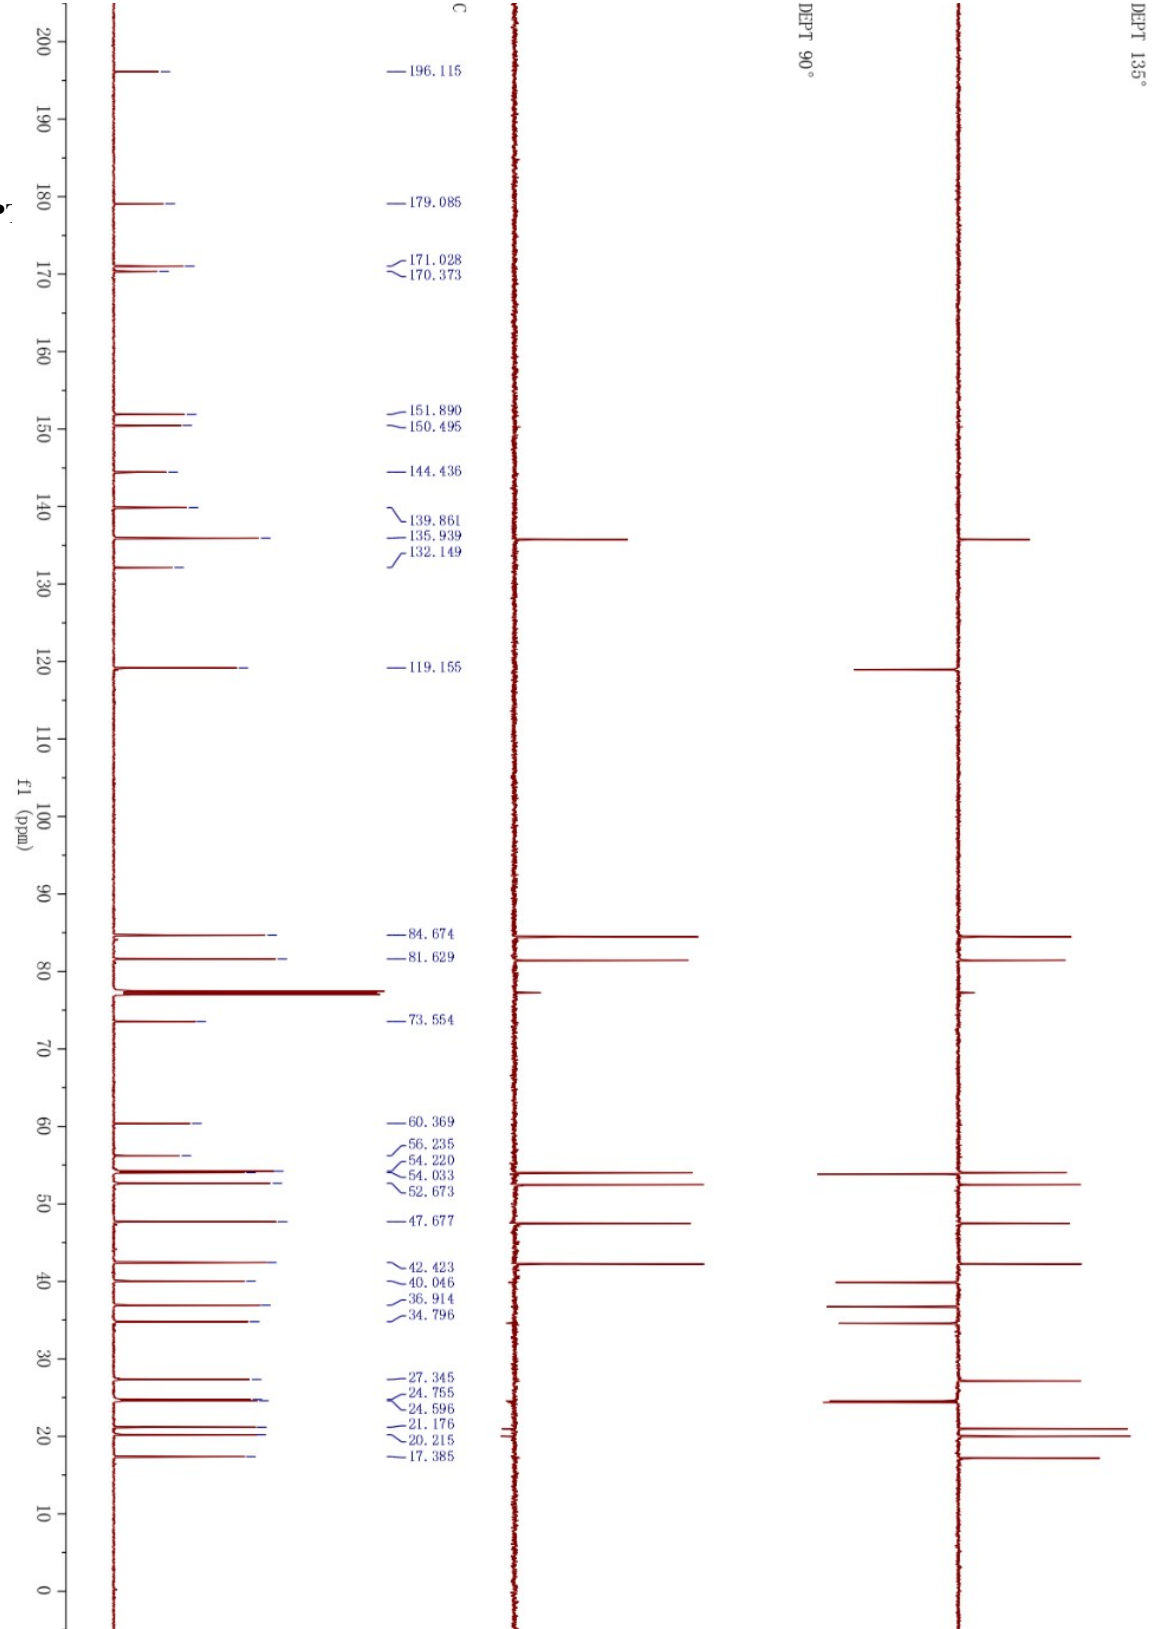

S73.  $^1\text{H}$ - $^1\text{H}$  COSY (6)

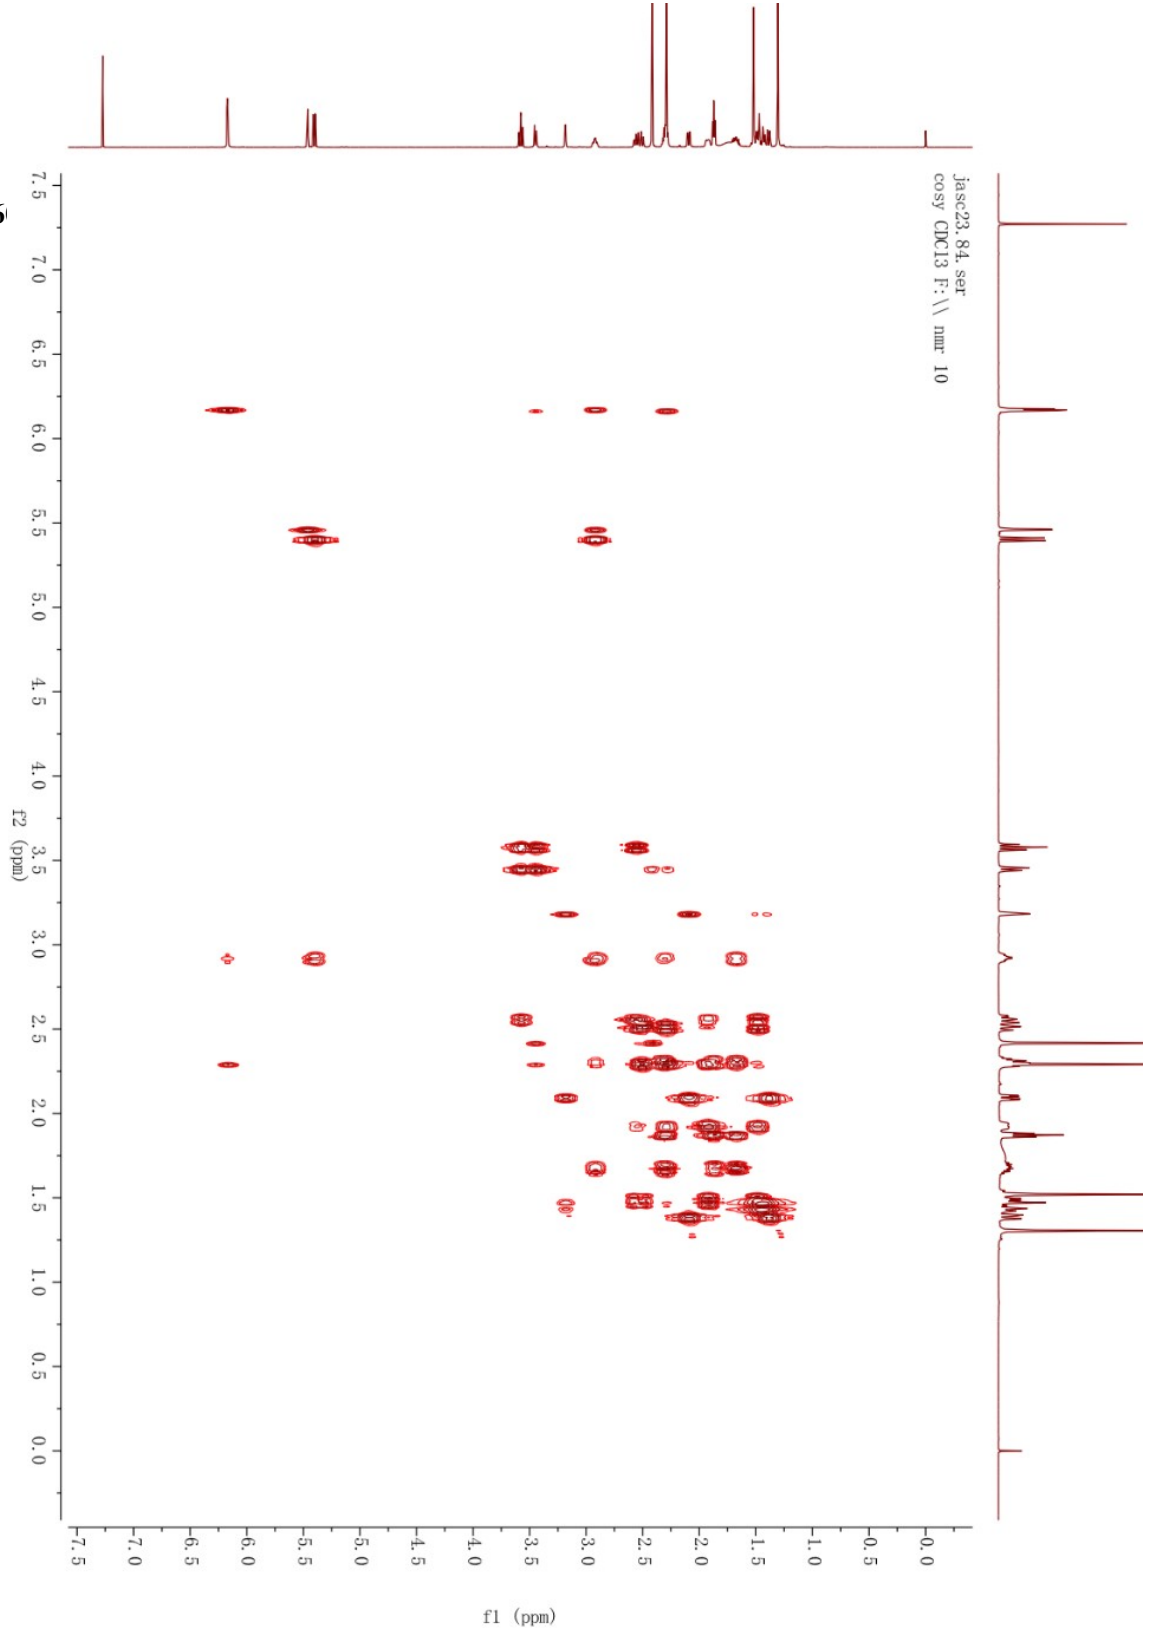



S74. HSQC spectrum

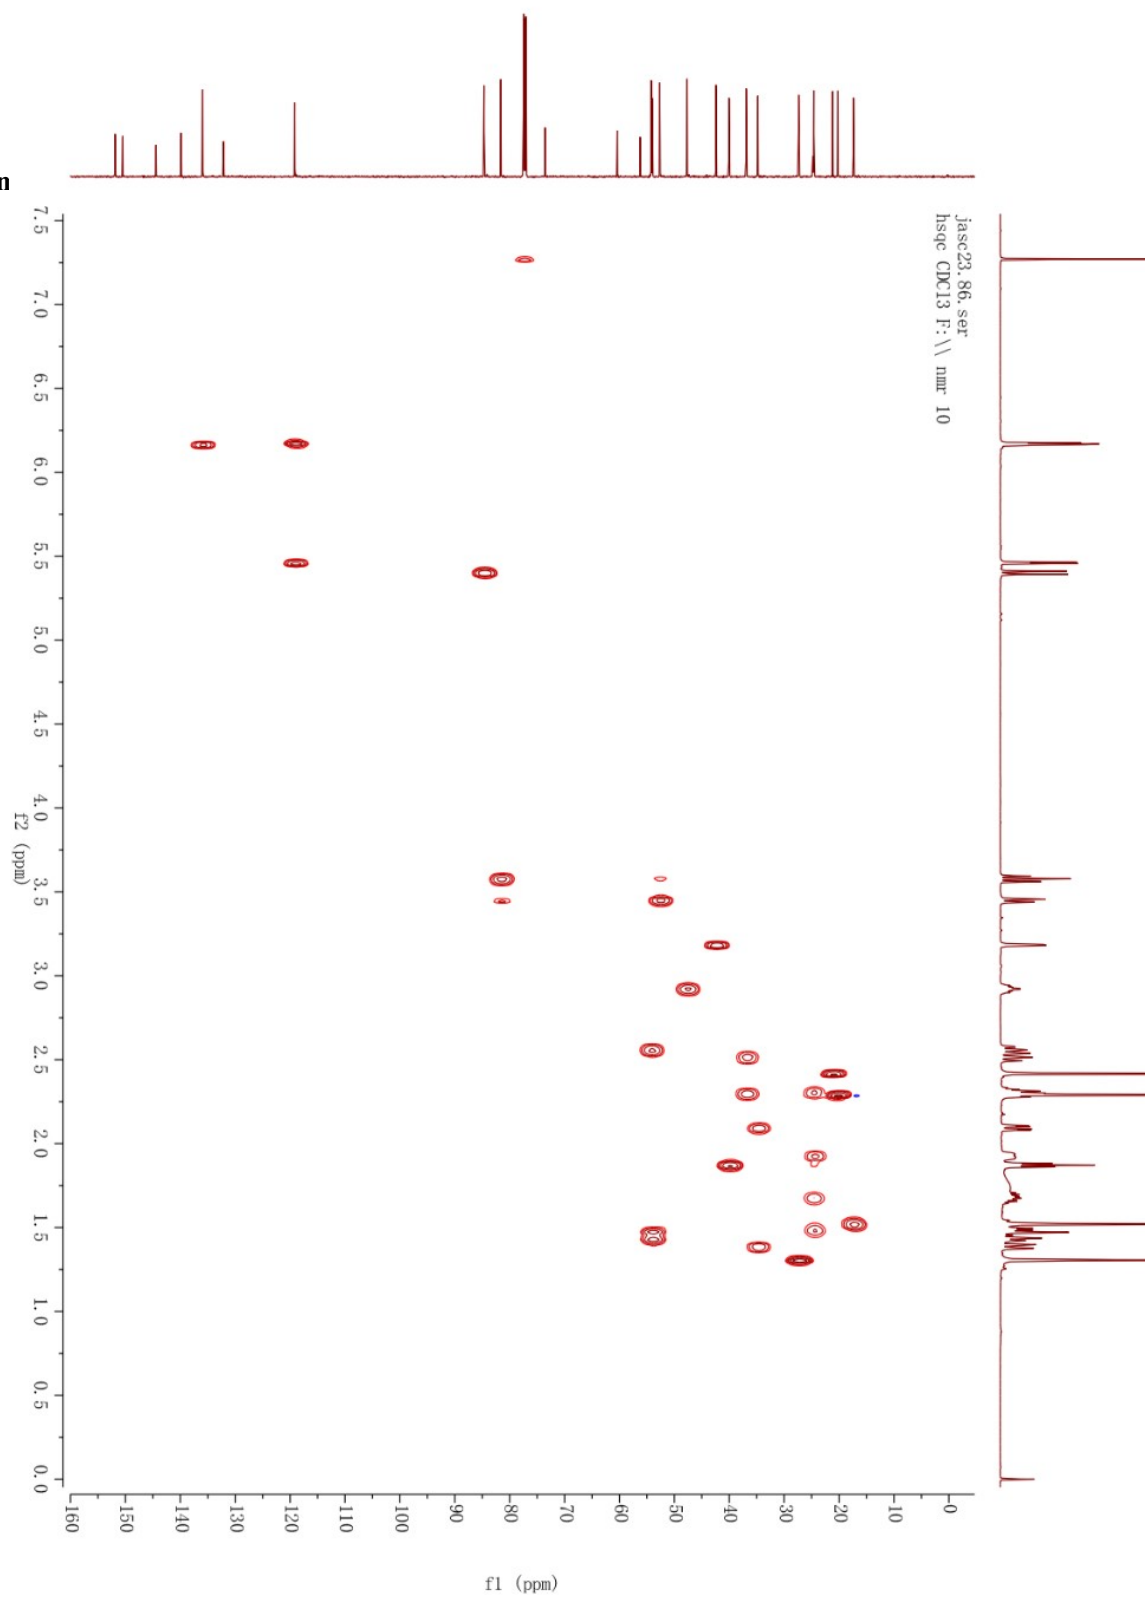

S75. HMBC spectrum

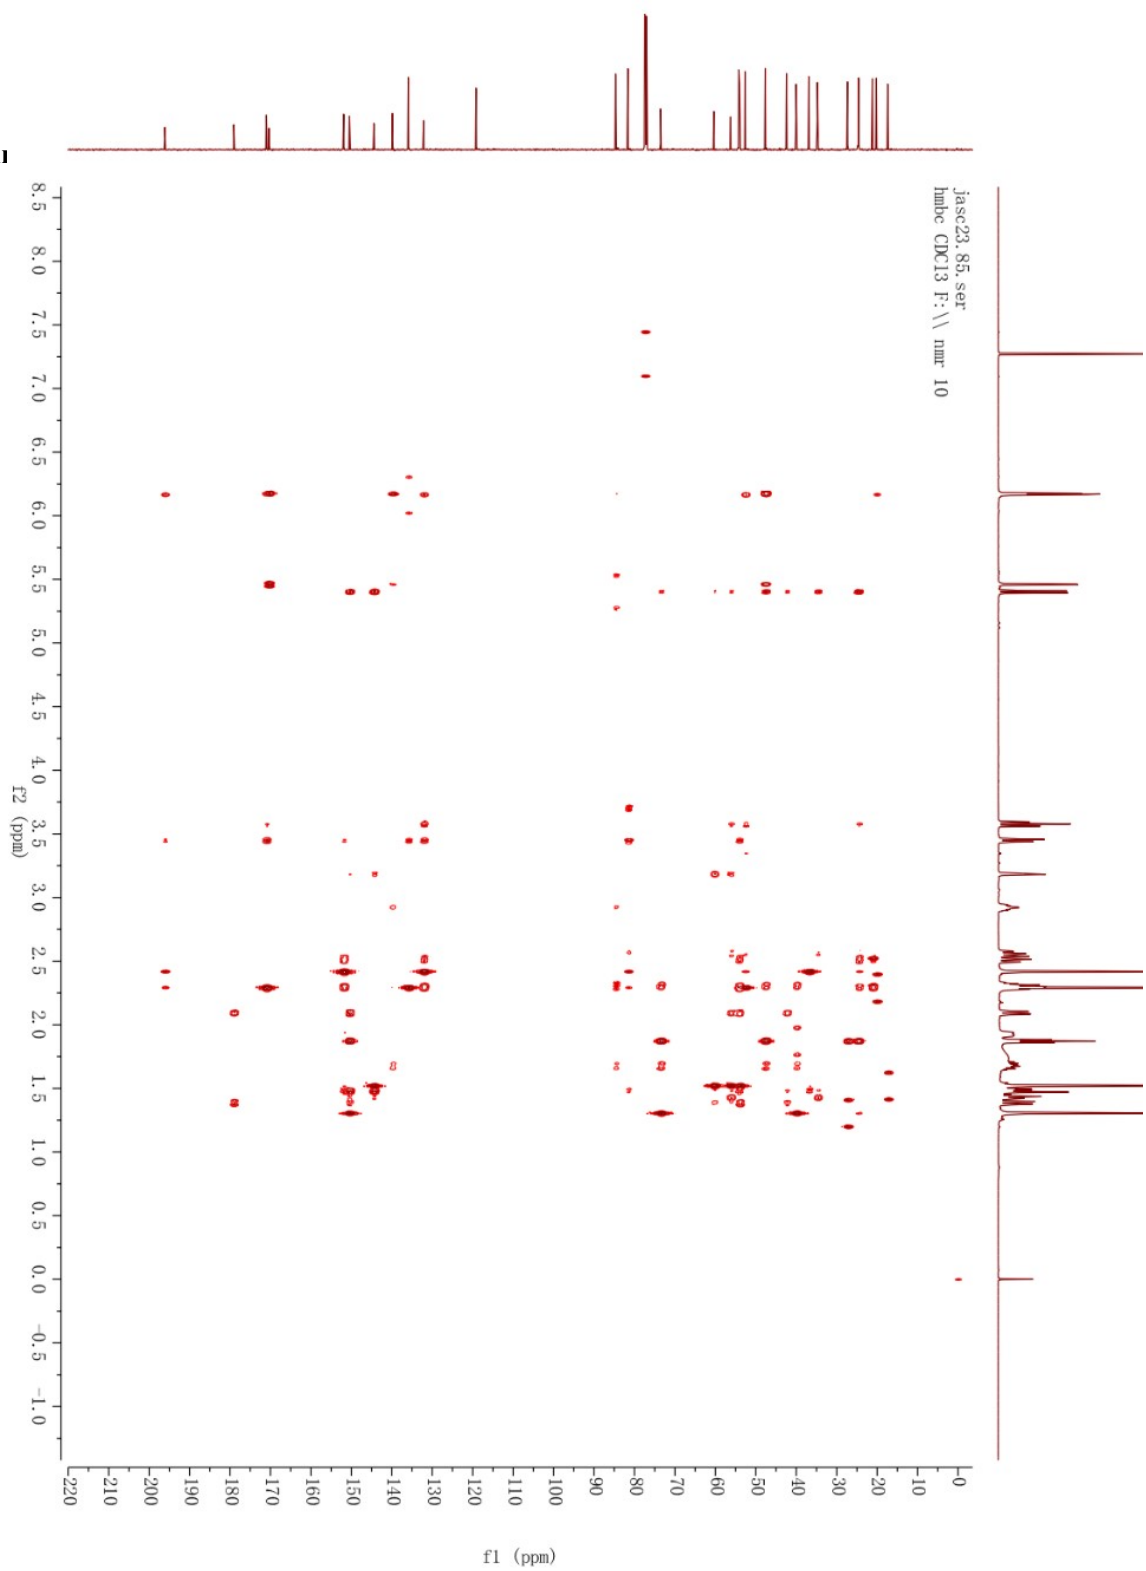

S76. ROESY spectrum

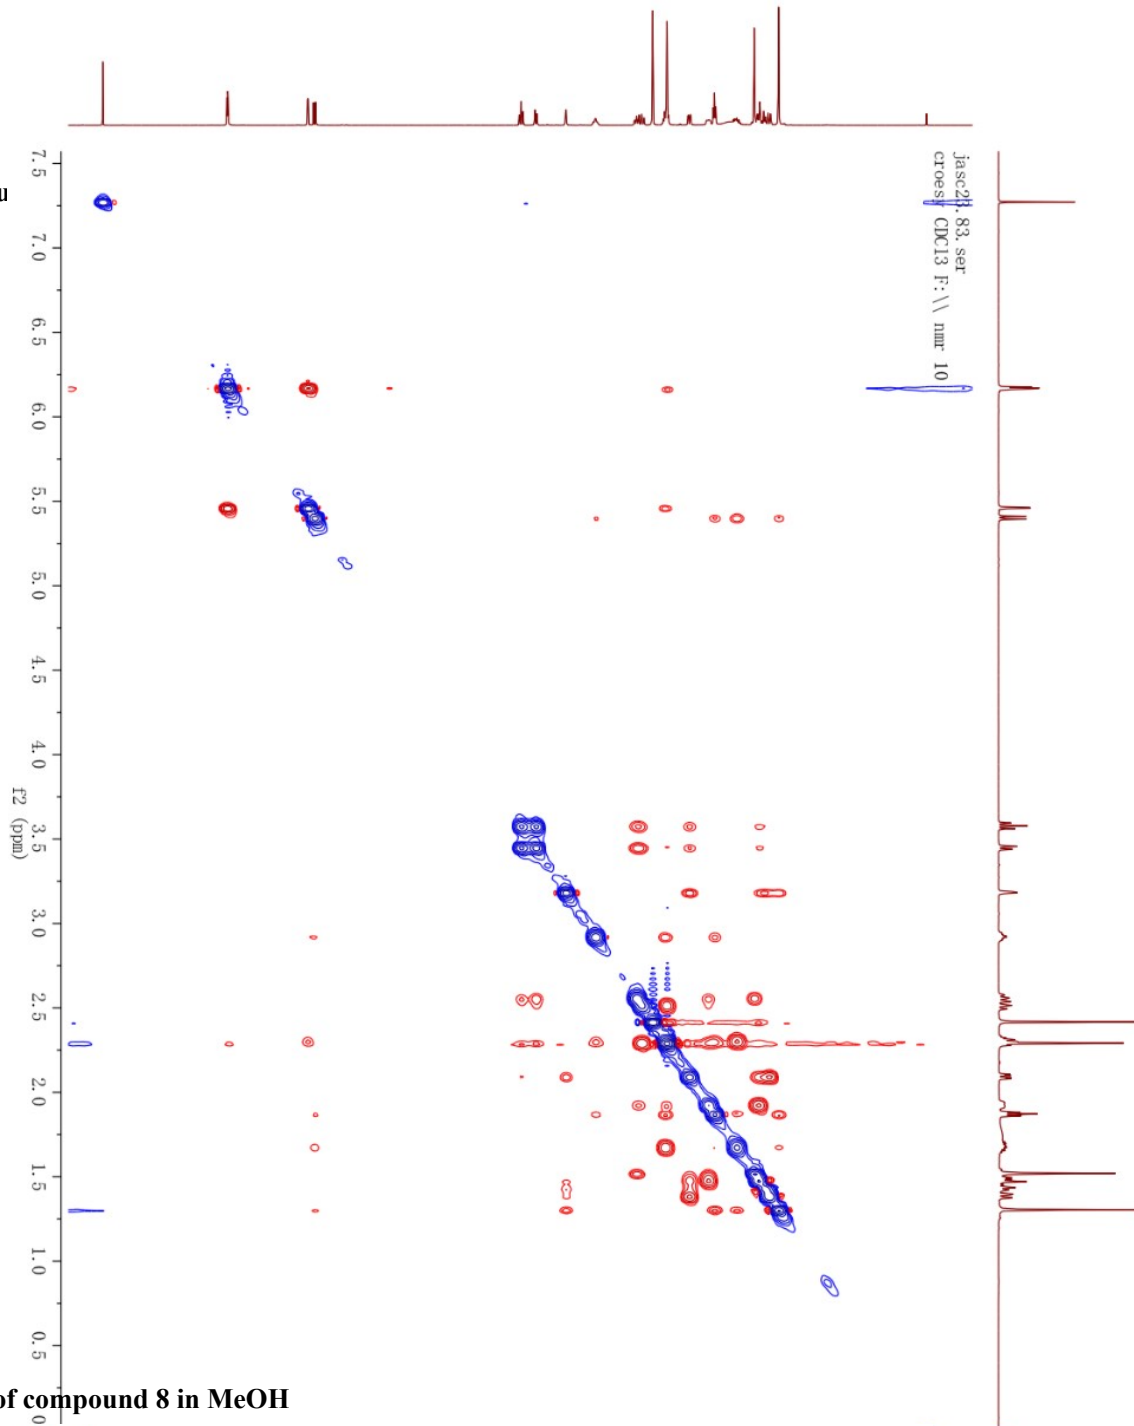

S77.  $[\alpha]_D$  spectrum of compound 8 in MeOH

**Rudolph Research Analytical**

This sample was measured on an Autopol VI, Serial #91058  
 Manufactured by Rudolph Research Analytical, Hackettstown, NJ, USA.

Measurement Date : Wednesday, 11-DEC-2024

Set Temperature : 20.0

Time Delay : Disabled

Delay between Measurement : Disabled

| n | Average | Std.Dev. | % RSD | Maximum | Minimum |
|---|---------|----------|-------|---------|---------|
| 5 | 139.85  | 0.34     | 0.24  | 140.00  | 139.23  |

| S.No | Sample ID | Time        | Result | Scale | OR °Arc | WLG.nm | Lg.mm  | Conc.g/100ml | Temp. |
|------|-----------|-------------|--------|-------|---------|--------|--------|--------------|-------|
| 1    | JASC-23   | 02:30:07 PM | 140.00 | SR    | 0.182   | 589    | 100.00 | 0.130        | 20.0  |
| 2    | JASC-23   | 02:30:13 PM | 140.00 | SR    | 0.182   | 589    | 100.00 | 0.130        | 20.0  |
| 3    | JASC-23   | 02:30:19 PM | 140.00 | SR    | 0.182   | 589    | 100.00 | 0.130        | 20.0  |
| 4    | JASC-23   | 02:30:26 PM | 139.23 | SR    | 0.181   | 589    | 100.00 | 0.130        | 20.0  |
| 5    | JASC-23   | 02:30:32 PM | 140.00 | SR    | 0.182   | 589    | 100.00 | 0.130        | 20.0  |

### S78. IR spectrum of compound 8

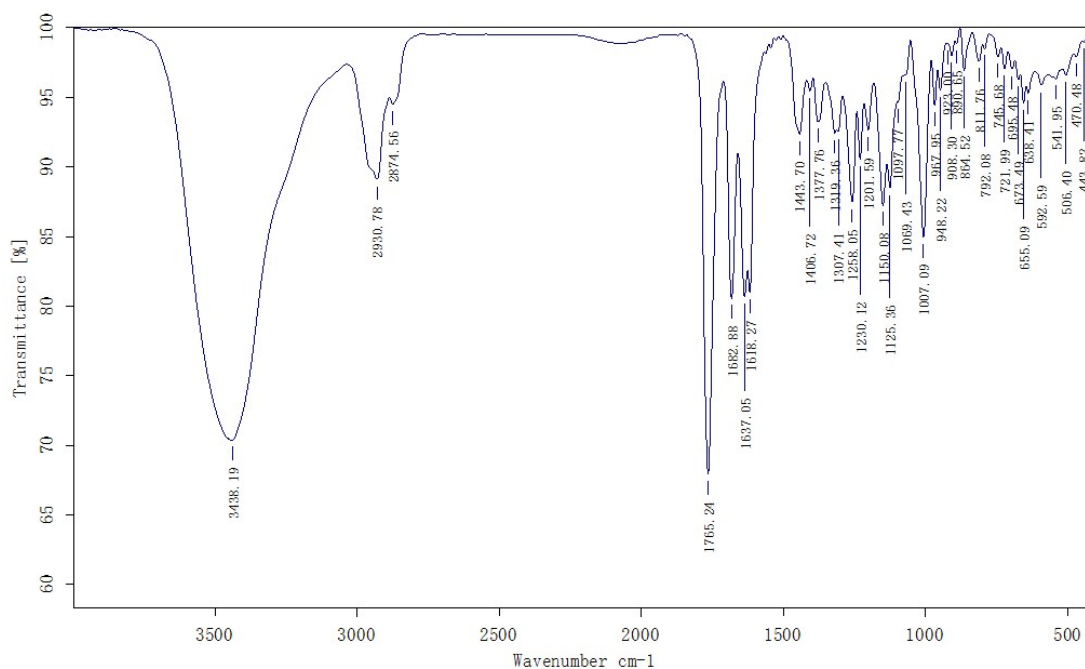

Sample Name: jasc-23  
Sample Form: KBr  
Path of File: E:\data  
Date of Measurement: 2024/12/31

Resolution: 4  
Aperture Setting: 6 mm  
Number of Background Scans: 16  
Number of Sample Scans: 16

Beamsplitter Setting: KBr  
Source Setting: MIR  
Instrument Type: BRUKER VERTEX 70  
Soft Version: OPUS8.1

### S79. ECD and UV spectra of compound 8

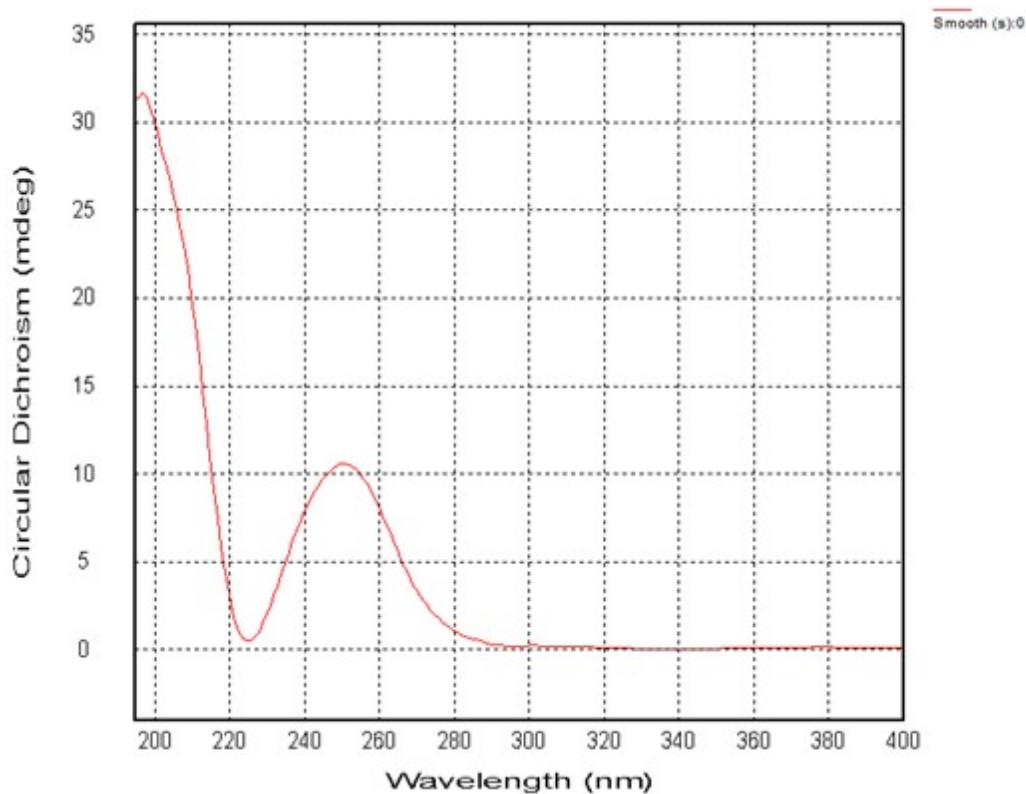

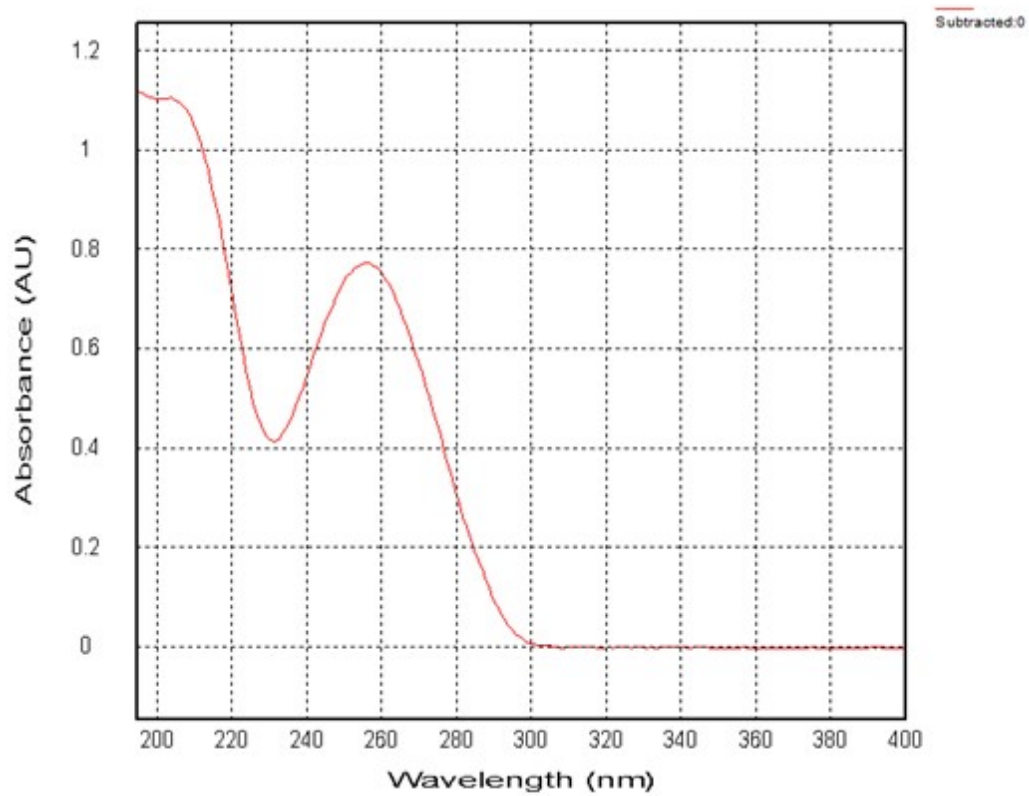

## S80. HRESIMS of compound 8

| Elmt | Val. | Min | Max | Elmt | Val. | Min | Max | Use Adduct |
|------|------|-----|-----|------|------|-----|-----|------------|
| H    | 1    | 0   | 300 | O    | 2    | 0   | 20  | H          |
| C    | 4    | 0   | 150 | Cl   | 1    | 0   | 0   | Na         |
| N    | 3    | 0   | 1   |      |      |     |     |            |

Error Margin (ppm): 100  
 HC Ratio: unlimited  
 Max Isotopes: all  
 MSn Iso RI (%): 75.00

DBE Range: -2.0 - 1000.0  
 Apply N Rule: yes  
 Isotope RI (%): 1.00  
 MSn Logic Mode: AND

Electron Ions: both  
 Use MSn Info: no  
 Isotope Res: 10000  
 Max Results: 500

Event#: 1 MS(E+) Ret. Time : 12.880 Scan#: 1933

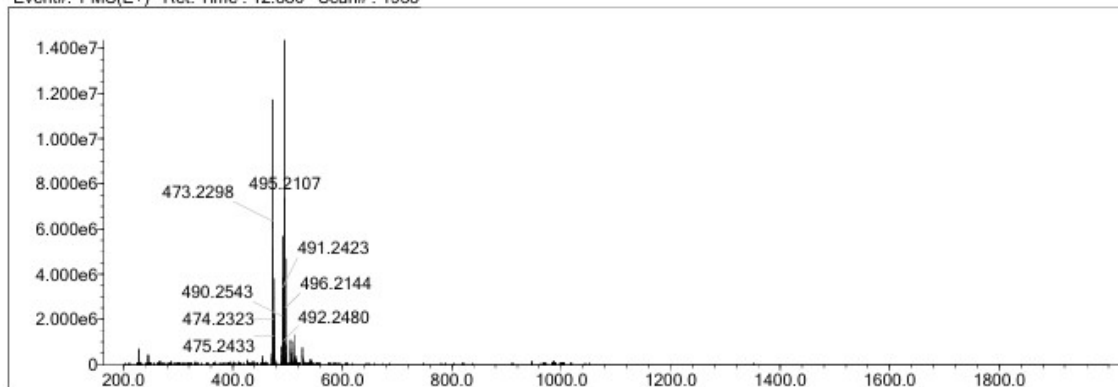

Measured region for 491.2423 m/z

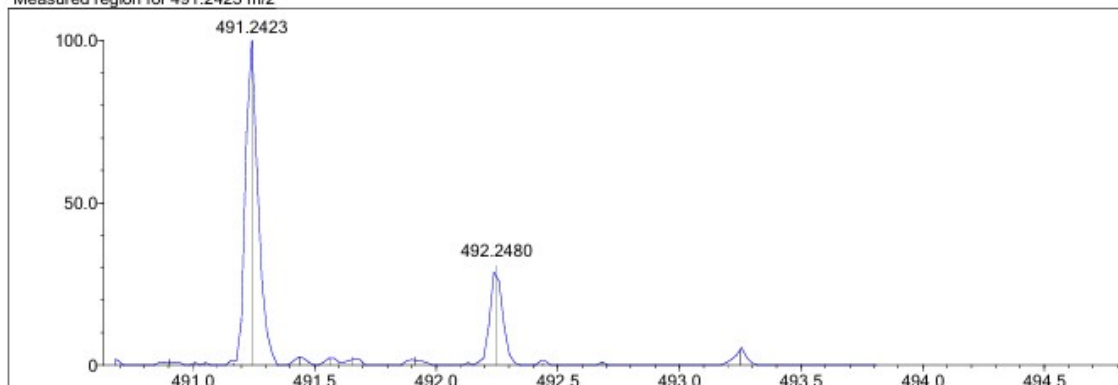

C30 H34 O6 [M+H]<sup>+</sup> : Predicted region for 491.2428 m/z

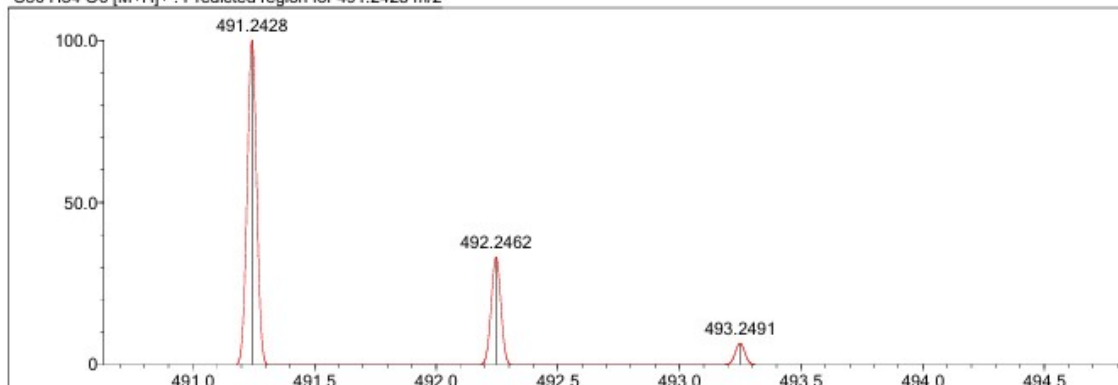

| Rank | Score | Formula (M) | Ion                | Meas. m/z | Pred. m/z | Df. (mDa) | Df. (ppm) | Iso   | DBE  |
|------|-------|-------------|--------------------|-----------|-----------|-----------|-----------|-------|------|
| 1    | 83.10 | C30 H34 O6  | [M+H] <sup>+</sup> | 491.2423  | 491.2428  | -0.5      | -1.02     | 83.14 | 14.0 |

## General results for NMR calculation

### S81. Structures of two possible diastereoisomers of 1 (1a–1b).

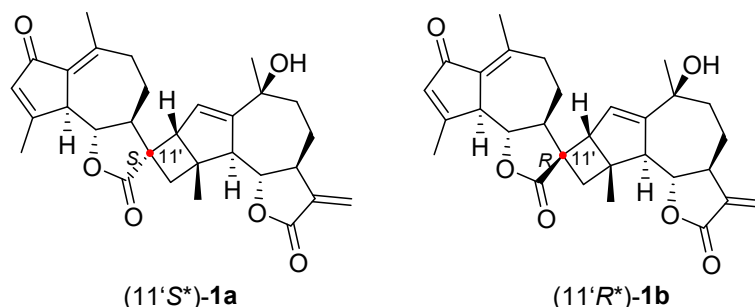

### S82. Conformational analysis of the B3LYP-D3BJ/6-31G(d) optimized conformers of 1a in the gas phase (T=298.15 K)

| Conformer   | E (Hartree) <sup>a</sup> | G (kcal/mol) <sup>b</sup> | $\Delta G$ (kcal/mol) <sup>c</sup> | Population <sup>d</sup> |
|-------------|--------------------------|---------------------------|------------------------------------|-------------------------|
| <b>1a-1</b> | -1614.810243             | -1013309.575817           | 0.00                               | 88.70%                  |
| <b>1a-2</b> | -1614.808306             | -1013308.360161           | -1.215656                          | 11.30%                  |

<sup>a</sup>Electronic energy obtained at M06-2X-D3/6-311+G(2d,p) level of theory;

<sup>b</sup>Gibbs free energy (E\*627.51);

<sup>c</sup>The relative Gibbs free energy;

<sup>d</sup>The Boltzmann distribution of each conformer.

### S83. Cartesian coordinates for the low-energy Conf. of Compound 1a at B3LYP/6311+G(d,p) level of theory in methanol

Conformer 1a-1

| Center Number | Atomic Number | Atomic Type | Coordinates (Angstroms) |           |           |
|---------------|---------------|-------------|-------------------------|-----------|-----------|
|               |               |             | X                       | Y         | Z         |
| 1             | 6             | 0           | 4.524297                | -2.486033 | -1.373018 |
| 2             | 6             | 0           | 5.448369                | -1.313779 | -1.414938 |
| 3             | 8             | 0           | 3.468448                | -2.169596 | -0.562116 |
| 4             | 6             | 0           | 4.738747                | -0.170952 | -0.742626 |
| 5             | 6             | 0           | 5.612836                | 0.844116  | 0.000813  |
| 6             | 6             | 0           | 0.368089                | 0.176424  | 1.584187  |
| 7             | 6             | 0           | 1.218561                | -0.957223 | 0.946568  |
| 8             | 6             | 0           | 3.702934                | -0.909290 | 0.124976  |
| 9             | 6             | 0           | 4.918386                | 1.612973  | 1.138781  |
| 10            | 6             | 0           | 1.267563                | 1.363744  | 1.653586  |
| 11            | 8             | 0           | 3.293839                | 3.214776  | 1.895188  |
| 12            | 6             | 0           | 2.379361                | -0.171452 | 0.246767  |
| 13            | 6             | 0           | 3.511331                | 2.212913  | 0.886932  |
| 14            | 6             | 0           | 2.413363                | 1.165727  | 0.986319  |
| 15            | 8             | 0           | 4.620047                | -3.551647 | -1.927704 |
| 16            | 6             | 0           | 6.663383                | -1.383439 | -1.956657 |
| 17            | 6             | 0           | 1.667759                | -2.053679 | 1.901652  |
| 18            | 6             | 0           | 3.422105                | 2.984223  | -0.434237 |
| 19            | 6             | 0           | -0.739010               | 1.051153  | -0.661165 |

|    |   |   |           |           |           |
|----|---|---|-----------|-----------|-----------|
| 20 | 6 | 0 | -0.706962 | 0.005916  | 0.444636  |
| 21 | 8 | 0 | -2.030189 | 1.252252  | -1.063947 |
| 22 | 6 | 0 | -2.177237 | -0.044723 | 0.871890  |
| 23 | 6 | 0 | -2.685781 | -1.275228 | 1.610358  |
| 24 | 6 | 0 | -6.002362 | 0.802805  | -1.918716 |
| 25 | 6 | 0 | -4.918687 | 1.477325  | -1.495163 |
| 26 | 6 | 0 | -2.907203 | 0.286144  | -0.430325 |
| 27 | 6 | 0 | -4.116311 | -1.072688 | 2.150623  |
| 28 | 6 | 0 | -6.314237 | -0.337711 | -1.039486 |
| 29 | 6 | 0 | -4.327647 | 0.833359  | -0.245983 |
| 30 | 6 | 0 | -5.206721 | -1.170512 | 1.098031  |
| 31 | 6 | 0 | -5.287366 | -0.314498 | 0.058504  |
| 32 | 8 | 0 | 0.177351  | 1.631301  | -1.188207 |
| 33 | 6 | 0 | -4.358632 | 2.723641  | -2.098987 |
| 34 | 6 | 0 | -6.177281 | -2.300362 | 1.311480  |
| 35 | 8 | 0 | -7.243130 | -1.121985 | -1.194573 |
| 36 | 6 | 0 | 0.038853  | -1.300511 | -0.002661 |
| 37 | 1 | 0 | 4.164969  | 0.354306  | -1.519214 |
| 38 | 1 | 0 | 6.012103  | 1.556315  | -0.729939 |
| 39 | 1 | 0 | 6.478898  | 0.322693  | 0.425955  |
| 40 | 1 | 0 | -0.088441 | -0.086153 | 2.546959  |
| 41 | 1 | 0 | 4.124537  | -1.155417 | 1.106753  |
| 42 | 1 | 0 | 4.848618  | 0.967320  | 2.025687  |
| 43 | 1 | 0 | 5.558465  | 2.455368  | 1.421483  |
| 44 | 1 | 0 | 1.014698  | 2.290346  | 2.156566  |
| 45 | 1 | 0 | 3.266070  | 2.750621  | 2.748319  |
| 46 | 1 | 0 | 2.067186  | 0.050007  | -0.783487 |
| 47 | 1 | 0 | 7.339480  | -0.533762 | -1.975100 |
| 48 | 1 | 0 | 7.003691  | -2.314166 | -2.401086 |
| 49 | 1 | 0 | 2.340897  | -1.651226 | 2.668840  |
| 50 | 1 | 0 | 0.799139  | -2.479451 | 2.417355  |
| 51 | 1 | 0 | 2.183249  | -2.862286 | 1.376647  |
| 52 | 1 | 0 | 4.216441  | 3.736742  | -0.478896 |
| 53 | 1 | 0 | 3.509746  | 2.324455  | -1.299906 |
| 54 | 1 | 0 | 2.451791  | 3.482027  | -0.490927 |
| 55 | 1 | 0 | -2.324478 | 0.821942  | 1.537220  |
| 56 | 1 | 0 | -2.016459 | -1.483470 | 2.454730  |
| 57 | 1 | 0 | -2.660859 | -2.158169 | 0.960848  |
| 58 | 1 | 0 | -6.616868 | 1.051419  | -2.776767 |
| 59 | 1 | 0 | -2.952909 | -0.589714 | -1.090200 |
| 60 | 1 | 0 | -4.312431 | -1.823110 | 2.923239  |
| 61 | 1 | 0 | -4.167237 | -0.095058 | 2.651380  |
| 62 | 1 | 0 | -4.299380 | 1.576808  | 0.565484  |
| 63 | 1 | 0 | -5.016442 | 3.109127  | -2.883023 |



|    |   |   |           |           |           |
|----|---|---|-----------|-----------|-----------|
| 64 | 1 | 0 | -4.231883 | 3.499474  | -1.333019 |
| 65 | 1 | 0 | -3.364292 | 2.544276  | -2.518187 |
| 66 | 1 | 0 | -6.666946 | -2.185689 | 2.288635  |
| 67 | 1 | 0 | -6.932435 | -2.351222 | 0.530222  |
| 68 | 1 | 0 | -5.628080 | -3.251687 | 1.353944  |
| 69 | 1 | 0 | -0.495600 | -2.203641 | 0.303089  |
| 70 | 1 | 0 | 0.280847  | -1.380159 | -1.065599 |

Conformer 1a-2

| Center<br>Number | Atomic<br>Number | Atomic<br>Type | Coordinates (Angstroms) |           |           |
|------------------|------------------|----------------|-------------------------|-----------|-----------|
|                  |                  |                | X                       | Y         | Z         |
| 1                | 6                | 0              | 5.092211                | -2.532742 | -0.807457 |
| 2                | 6                | 0              | 5.954634                | -1.324260 | -0.676818 |
| 3                | 8                | 0              | 3.822664                | -2.188727 | -0.435382 |
| 4                | 6                | 0              | 5.034969                | -0.158184 | -0.432385 |
| 5                | 6                | 0              | 5.655693                | 1.015868  | 0.336058  |
| 6                | 6                | 0              | 0.447645                | 0.072820  | 1.267758  |
| 7                | 6                | 0              | 1.133629                | -0.873335 | 0.223471  |
| 8                | 6                | 0              | 3.788936                | -0.861595 | 0.156161  |
| 9                | 6                | 0              | 4.707938                | 2.026742  | 1.011482  |
| 10               | 6                | 0              | 1.358438                | 1.244384  | 1.368045  |
| 11               | 8                | 0              | 2.874659                | 3.483563  | 1.030933  |
| 12               | 6                | 0              | 2.469225                | -0.164176 | -0.192236 |
| 13               | 6                | 0              | 3.361553                | 2.333670  | 0.325030  |
| 14               | 6                | 0              | 2.392782                | 1.180988  | 0.523324  |
| 15               | 8                | 0              | 5.382132                | -3.643632 | -1.174775 |
| 16               | 6                | 0              | 7.282641                | -1.380862 | -0.765063 |
| 17               | 6                | 0              | 1.224525                | -2.337746 | 0.632994  |
| 18               | 6                | 0              | 3.492277                | 2.727067  | -1.156272 |
| 19               | 6                | 0              | -1.117090               | 1.676336  | -0.177478 |
| 20               | 6                | 0              | -0.781281               | 0.269462  | 0.316324  |
| 21               | 8                | 0              | -2.456371               | 1.754355  | -0.429186 |
| 22               | 6                | 0              | -2.157831               | -0.199655 | 0.808712  |
| 23               | 6                | 0              | -2.400464               | -1.682117 | 1.061630  |
| 24               | 6                | 0              | -6.357495               | 0.916881  | -1.257928 |
| 25               | 6                | 0              | -5.364900               | 1.571578  | -0.629064 |
| 26               | 6                | 0              | -3.087030               | 0.465439  | -0.209227 |
| 27               | 6                | 0              | -3.785370               | -1.948442 | 1.687505  |
| 28               | 6                | 0              | -6.380646               | -0.513196 | -0.901611 |
| 29               | 6                | 0              | -4.545924               | 0.620113  | 0.237271  |
| 30               | 6                | 0              | -4.942695               | -1.865899 | 0.709880  |
| 31               | 6                | 0              | -5.269529               | -0.714680 | 0.088987  |
| 32               | 8                | 0              | -0.392912               | 2.619669  | -0.384450 |
| 33               | 6                | 0              | -5.090870               | 3.038699  | -0.695322 |

|    |   |   |           |           |           |
|----|---|---|-----------|-----------|-----------|
| 34 | 6 | 0 | -5.677335 | -3.160040 | 0.491718  |
| 35 | 8 | 0 | -7.171585 | -1.343235 | -1.334259 |
| 36 | 6 | 0 | -0.032534 | -0.577119 | -0.769776 |
| 37 | 1 | 0 | 4.722544  | 0.197737  | -1.423877 |
| 38 | 1 | 0 | 6.304402  | 1.545993  | -0.371324 |
| 39 | 1 | 0 | 6.321664  | 0.612322  | 1.107840  |
| 40 | 1 | 0 | 0.167901  | -0.369491 | 2.232341  |
| 41 | 1 | 0 | 3.882846  | -0.984117 | 1.242910  |
| 42 | 1 | 0 | 4.464731  | 1.691120  | 2.025262  |
| 43 | 1 | 0 | 5.236220  | 2.980229  | 1.120895  |
| 44 | 1 | 0 | 1.143996  | 2.102898  | 1.992078  |
| 45 | 1 | 0 | 1.986636  | 3.663663  | 0.675530  |
| 46 | 1 | 0 | 2.474751  | -0.039595 | -1.284813 |
| 47 | 1 | 0 | 7.910119  | -0.501114 | -0.659087 |
| 48 | 1 | 0 | 7.769882  | -2.333497 | -0.951052 |
| 49 | 1 | 0 | 1.930516  | -2.481827 | 1.457585  |
| 50 | 1 | 0 | 0.246023  | -2.694112 | 0.969527  |
| 51 | 1 | 0 | 1.552966  | -2.968524 | -0.195226 |
| 52 | 1 | 0 | 4.144246  | 3.602214  | -1.237304 |
| 53 | 1 | 0 | 3.895871  | 1.933485  | -1.788683 |
| 54 | 1 | 0 | 2.503477  | 2.991692  | -1.548266 |
| 55 | 1 | 0 | -2.327043 | 0.322134  | 1.765379  |
| 56 | 1 | 0 | -1.634976 | -2.046120 | 1.755726  |
| 57 | 1 | 0 | -2.295734 | -2.263310 | 0.138069  |
| 58 | 1 | 0 | -7.090510 | 1.354698  | -1.926294 |
| 59 | 1 | 0 | -3.070303 | -0.071740 | -1.166092 |
| 60 | 1 | 0 | -3.780581 | -2.945598 | 2.139375  |
| 61 | 1 | 0 | -3.940133 | -1.237307 | 2.511627  |
| 62 | 1 | 0 | -4.545709 | 0.981990  | 1.276836  |
| 63 | 1 | 0 | -5.883536 | 3.561049  | -1.238317 |
| 64 | 1 | 0 | -5.018394 | 3.462575  | 0.314527  |
| 65 | 1 | 0 | -4.130459 | 3.238205  | -1.179363 |
| 66 | 1 | 0 | -6.087554 | -3.517166 | 1.446629  |
| 67 | 1 | 0 | -6.481163 | -3.061483 | -0.234741 |
| 68 | 1 | 0 | -4.969903 | -3.931107 | 0.154989  |
| 69 | 1 | 0 | -0.575027 | -1.460101 | -1.119081 |
| 70 | 1 | 0 | 0.266926  | 0.012268  | -1.640933 |

**S84. Conformational analysis of the B3LYP-D3BJ/6-31G(d) optimized conformers of 1b in the gas phase (T=298.15 K)**

| Conformer   | E (Hartree) <sup>a</sup> | G (kcal/mol) <sup>b</sup> | $\Delta G$ (kcal/mol) <sup>c</sup> | Population <sup>d</sup> |
|-------------|--------------------------|---------------------------|------------------------------------|-------------------------|
| <b>1b-1</b> | -1615.068114             | -1013471.392015           | 0                                  | 46.29%                  |
| <b>1b-2</b> | -1615.067516             | -1013471.016670           | 0.375345                           | 24.37%                  |
| <b>1b-3</b> | -1615.067372             | -1013470.926415           | 0.465600                           | 20.93%                  |
| <b>1b-4</b> | -1615.066503             | -1013470.381254           | 1.010762                           | 8.41%                   |

<sup>a</sup>Electronic energy obtained at M06-2X-D3/6-311+G(2d,p) level of theory;

<sup>b</sup>Gibbs free energy (E\*627.51);

<sup>c</sup>The relative Gibbs free energy;

<sup>d</sup>The Boltzmann distribution of each conformer.

**S85. Cartesian coordinates for the low-energy Conf. of Compound 1b at B3LYP/6311+G(d,p) level of theory in methanol**

Conformer 1b-1

| Center Number | Atomic Number | Atomic Type | Coordinates (Angstroms) |           |           |
|---------------|---------------|-------------|-------------------------|-----------|-----------|
|               |               |             | X                       | Y         | Z         |
| 1             | 6             | 0           | -5.205640               | -1.281121 | 1.113988  |
| 2             | 6             | 0           | -5.526329               | 0.161206  | 0.902786  |
| 3             | 8             | 0           | -4.009374               | -1.545520 | 0.504218  |
| 4             | 6             | 0           | -4.297911               | 0.799837  | 0.315771  |
| 5             | 6             | 0           | -4.524638               | 1.985712  | -0.625277 |
| 6             | 6             | 0           | 0.018331                | -1.046273 | -1.353085 |
| 7             | 6             | 0           | -1.253175               | -1.602973 | -0.644336 |
| 8             | 6             | 0           | -3.571504               | -0.413949 | -0.296087 |
| 9             | 6             | 0           | -3.397799               | 2.259640  | -1.635483 |
| 10            | 6             | 0           | -0.240915               | 0.406558  | -1.549889 |
| 11            | 8             | 0           | -1.142212               | 2.934585  | -2.117543 |
| 12            | 6             | 0           | -2.052489               | -0.323864 | -0.212655 |
| 13            | 6             | 0           | -1.928244               | 2.230651  | -1.143339 |
| 14            | 6             | 0           | -1.404271               | 0.806135  | -1.015260 |
| 15            | 8             | 0           | -5.831966               | -2.121731 | 1.707747  |
| 16            | 6             | 0           | -6.717451               | 0.679232  | 1.198175  |
| 17            | 6             | 0           | -2.022617               | -2.623472 | -1.473528 |
| 18            | 6             | 0           | -1.715854               | 3.032606  | 0.145801  |
| 19            | 6             | 0           | 1.875158                | -2.637989 | -0.720523 |
| 20            | 6             | 0           | 0.911575                | -1.609491 | -0.154487 |
| 21            | 8             | 0           | 3.134695                | -2.109971 | -0.759325 |
| 22            | 6             | 0           | 1.852582                | -0.721426 | 0.677320  |
| 23            | 6             | 0           | 1.320129                | 0.671657  | 1.128833  |
| 24            | 6             | 0           | 5.238610                | 1.570209  | -0.734964 |
| 25            | 6             | 0           | 5.353763                | 0.228301  | -0.765369 |
| 26            | 6             | 0           | 3.114764                | -0.761585 | -0.232187 |
| 27            | 6             | 0           | 2.085439                | 1.370498  | 2.330047  |

|    |   |   |           |           |           |
|----|---|---|-----------|-----------|-----------|
| 28 | 6 | 0 | 4.366614  | 2.003178  | 0.390713  |
| 29 | 6 | 0 | 4.527871  | -0.389896 | 0.355403  |
| 30 | 6 | 0 | 3.403304  | 0.652860  | 2.333806  |
| 31 | 6 | 0 | 4.179867  | 0.786054  | 1.231762  |
| 32 | 8 | 0 | 1.626667  | -3.742294 | -1.133937 |
| 33 | 6 | 0 | 6.029958  | -0.624801 | -1.784465 |
| 34 | 6 | 0 | 3.578796  | -0.471448 | 3.315793  |
| 35 | 8 | 0 | 3.945763  | 3.138170  | 0.591574  |
| 36 | 6 | 0 | -0.365327 | -2.201170 | 0.484103  |
| 37 | 1 | 0 | -3.675337 | 1.129965  | 1.159841  |
| 38 | 1 | 0 | -4.694216 | 2.880385  | -0.015530 |
| 39 | 1 | 0 | -5.450313 | 1.819683  | -1.189055 |
| 40 | 1 | 0 | 0.272974  | -1.552376 | -2.290741 |
| 41 | 1 | 0 | -3.909256 | -0.594344 | -1.323431 |
| 42 | 1 | 0 | -3.477138 | 1.550366  | -2.471216 |
| 43 | 1 | 0 | -3.553747 | 3.257032  | -2.060103 |
| 44 | 1 | 0 | 0.430166  | 1.069082  | -2.085588 |
| 45 | 1 | 0 | -1.232397 | 2.452497  | -2.956342 |
| 46 | 1 | 0 | -1.850051 | -0.139056 | 0.854787  |
| 47 | 1 | 0 | -6.952378 | 1.726428  | 1.032183  |
| 48 | 1 | 0 | -7.491132 | 0.045480  | 1.621634  |
| 49 | 1 | 0 | -2.431856 | -2.163505 | -2.382043 |
| 50 | 1 | 0 | -1.339042 | -3.420806 | -1.783226 |
| 51 | 1 | 0 | -2.845284 | -3.069142 | -0.909590 |
| 52 | 1 | 0 | -2.185650 | 2.557071  | 1.009778  |
| 53 | 1 | 0 | -0.643370 | 3.120060  | 0.338751  |
| 54 | 1 | 0 | -2.129179 | 4.039677  | 0.030878  |
| 55 | 1 | 0 | 2.071302  | -1.327117 | 1.564204  |
| 56 | 1 | 0 | 0.261897  | 0.571622  | 1.390972  |
| 57 | 1 | 0 | 1.369033  | 1.351658  | 0.275597  |
| 58 | 1 | 0 | 5.646313  | 2.269789  | -1.456321 |
| 59 | 1 | 0 | 2.931504  | -0.080242 | -1.073881 |
| 60 | 1 | 0 | 2.193021  | 2.432656  | 2.106567  |
| 61 | 1 | 0 | 1.542733  | 1.252409  | 3.272990  |
| 62 | 1 | 0 | 4.982757  | -1.270490 | 0.816369  |
| 63 | 1 | 0 | 6.474694  | -0.030176 | -2.587220 |
| 64 | 1 | 0 | 6.820136  | -1.228526 | -1.318233 |
| 65 | 1 | 0 | 5.316371  | -1.336981 | -2.218613 |
| 66 | 1 | 0 | 3.951636  | -0.038666 | 4.256548  |
| 67 | 1 | 0 | 2.637439  | -0.973491 | 3.565205  |
| 68 | 1 | 0 | 4.310674  | -1.214657 | 2.988721  |
| 69 | 1 | 0 | -0.581170 | -1.827662 | 1.490217  |
| 70 | 1 | 0 | -0.355310 | -3.293783 | 0.503811  |

## Conformer 1b-2

| Center<br>Number | Atomic<br>Number | Atomic<br>Type | Coordinates (Angstroms) |           |           |
|------------------|------------------|----------------|-------------------------|-----------|-----------|
|                  |                  |                | X                       | Y         | Z         |
| 1                | 6                | 0              | -5.142276               | -1.338636 | 1.070795  |
| 2                | 6                | 0              | -5.389457               | 0.133953  | 1.121867  |
| 3                | 8                | 0              | -3.952550               | -1.545084 | 0.424560  |
| 4                | 6                | 0              | -4.101155               | 0.788007  | 0.703952  |
| 5                | 6                | 0              | -4.170417               | 2.185765  | 0.110482  |
| 6                | 6                | 0              | 0.058402                | -1.023321 | -1.396677 |
| 7                | 6                | 0              | -1.236849               | -1.574994 | -0.731357 |
| 8                | 6                | 0              | -3.499849               | -0.308288 | -0.197743 |
| 9                | 6                | 0              | -2.796672               | 2.791791  | -0.206431 |
| 10               | 6                | 0              | -0.194382               | 0.430132  | -1.613995 |
| 11               | 8                | 0              | -3.045885               | 1.926267  | -2.407844 |
| 12               | 6                | 0              | -1.979449               | -0.283858 | -0.248645 |
| 13               | 6                | 0              | -2.036212               | 2.169267  | -1.399002 |
| 14               | 6                | 0              | -1.370586               | 0.831867  | -1.103464 |
| 15               | 8                | 0              | -5.810585               | -2.241561 | 1.507020  |
| 16               | 6                | 0              | -6.565938               | 0.654915  | 1.464727  |
| 17               | 6                | 0              | -2.043752               | -2.504284 | -1.627740 |
| 18               | 6                | 0              | -1.034167               | 3.201040  | -1.933822 |
| 19               | 6                | 0              | 1.905297                | -2.624892 | -0.763188 |
| 20               | 6                | 0              | 0.915087                | -1.624876 | -0.189716 |
| 21               | 8                | 0              | 3.158684                | -2.080113 | -0.757238 |
| 22               | 6                | 0              | 1.826226                | -0.752990 | 0.693549  |
| 23               | 6                | 0              | 1.269102                | 0.622014  | 1.170284  |
| 24               | 6                | 0              | 5.181883                | 1.632138  | -0.630660 |
| 25               | 6                | 0              | 5.330044                | 0.293914  | -0.683037 |
| 26               | 6                | 0              | 3.105014                | -0.748054 | -0.195946 |
| 27               | 6                | 0              | 2.004424                | 1.304318  | 2.398527  |
| 28               | 6                | 0              | 4.282805                | 2.022826  | 0.488969  |
| 29               | 6                | 0              | 4.504187                | -0.362765 | 0.415704  |
| 30               | 6                | 0              | 3.336924                | 0.614879  | 2.400190  |
| 31               | 6                | 0              | 4.120996                | 0.788315  | 1.309448  |
| 32               | 8                | 0              | 1.681297                | -3.718760 | -1.215130 |
| 33               | 6                | 0              | 6.039545                | -0.524461 | -1.707748 |
| 34               | 6                | 0              | 3.525926                | -0.527037 | 3.358762  |
| 35               | 8                | 0              | 3.820683                | 3.141128  | 0.695785  |
| 36               | 6                | 0              | -0.380199               | -2.255070 | 0.375322  |
| 37               | 1                | 0              | -3.457195               | 0.828251  | 1.599427  |
| 38               | 1                | 0              | -4.668520               | 2.842431  | 0.834730  |
| 39               | 1                | 0              | -4.784472               | 2.180437  | -0.794077 |
| 40               | 1                | 0              | 0.328034                | -1.525806 | -2.332174 |
| 41               | 1                | 0              | -3.933848               | -0.260592 | -1.201557 |

|    |   |   |           |           |           |
|----|---|---|-----------|-----------|-----------|
| 42 | 1 | 0 | -2.947273 | 3.851907  | -0.436901 |
| 43 | 1 | 0 | -2.147859 | 2.754839  | 0.678644  |
| 44 | 1 | 0 | 0.478938  | 1.056246  | -2.189692 |
| 45 | 1 | 0 | -2.593152 | 1.497666  | -3.152068 |
| 46 | 1 | 0 | -1.667062 | -0.100338 | 0.790884  |
| 47 | 1 | 0 | -6.742458 | 1.726218  | 1.483763  |
| 48 | 1 | 0 | -7.388419 | -0.000178 | 1.736792  |
| 49 | 1 | 0 | -2.447514 | -1.957108 | -2.489409 |
| 50 | 1 | 0 | -1.390137 | -3.296152 | -2.009068 |
| 51 | 1 | 0 | -2.876185 | -2.963956 | -1.092003 |
| 52 | 1 | 0 | -0.277575 | 3.451716  | -1.182465 |
| 53 | 1 | 0 | -0.518686 | 2.836323  | -2.827971 |
| 54 | 1 | 0 | -1.572095 | 4.112222  | -2.209176 |
| 55 | 1 | 0 | 2.035632  | -1.380472 | 1.567536  |
| 56 | 1 | 0 | 0.209873  | 0.501291  | 1.416913  |
| 57 | 1 | 0 | 1.321535  | 1.321593  | 0.333158  |
| 58 | 1 | 0 | 5.581305  | 2.353978  | -1.334546 |
| 59 | 1 | 0 | 2.918926  | -0.048019 | -1.021814 |
| 60 | 1 | 0 | 2.091394  | 2.374136  | 2.204714  |
| 61 | 1 | 0 | 1.453497  | 1.149114  | 3.331266  |
| 62 | 1 | 0 | 4.970815  | -1.243077 | 0.865006  |
| 63 | 1 | 0 | 6.481280  | 0.094687  | -2.493425 |
| 64 | 1 | 0 | 6.837064  | -1.118227 | -1.241280 |
| 65 | 1 | 0 | 5.348496  | -1.244859 | -2.164177 |
| 66 | 1 | 0 | 3.870573  | -0.107164 | 4.315941  |
| 67 | 1 | 0 | 2.594007  | -1.059193 | 3.579507  |
| 68 | 1 | 0 | 4.282563  | -1.242929 | 3.027488  |
| 69 | 1 | 0 | -0.625056 | -1.964093 | 1.401629  |
| 70 | 1 | 0 | -0.366594 | -3.345581 | 0.306720  |

Conformer 1b-3

| Center<br>Number | Atomic<br>Number | Atomic<br>Type | Coordinates (Angstroms) |           |           |
|------------------|------------------|----------------|-------------------------|-----------|-----------|
|                  |                  |                | X                       | Y         | Z         |
| 1                | 6                | 0              | -5.559352               | -1.290585 | 0.622358  |
| 2                | 6                | 0              | -5.829854               | 0.154656  | 0.374520  |
| 3                | 8                | 0              | -4.249071               | -1.534375 | 0.317643  |
| 4                | 6                | 0              | -4.497215               | 0.808862  | 0.131405  |
| 5                | 6                | 0              | -4.515021               | 2.052080  | -0.763548 |
| 6                | 6                | 0              | -0.046956               | -1.028124 | -1.027733 |
| 7                | 6                | 0              | -1.275015               | -1.563150 | -0.220962 |
| 8                | 6                | 0              | -3.638663               | -0.387499 | -0.333409 |
| 9                | 6                | 0              | -3.195455               | 2.425551  | -1.458258 |
| 10               | 6                | 0              | -0.297509               | 0.427162  | -1.195389 |
| 11               | 8                | 0              | -0.956799               | 3.079036  | -1.412097 |
| 12               | 6                | 0              | -2.167487               | -0.304166 | 0.082308  |

|    |   |   |           |           |           |
|----|---|---|-----------|-----------|-----------|
| 13 | 6 | 0 | -1.886631 | 2.296604  | -0.648041 |
| 14 | 6 | 0 | -1.424610 | 0.845258  | -0.605314 |
| 15 | 8 | 0 | -6.303233 | -2.148359 | 1.026140  |
| 16 | 6 | 0 | -7.060532 | 0.664210  | 0.377585  |
| 17 | 6 | 0 | -1.947364 | -2.768352 | -0.870400 |
| 18 | 6 | 0 | -1.975368 | 2.917852  | 0.756008  |
| 19 | 6 | 0 | 1.751945  | -2.682142 | -0.405069 |
| 20 | 6 | 0 | 0.917132  | -1.534207 | 0.136352  |
| 21 | 8 | 0 | 3.019901  | -2.234211 | -0.659729 |
| 22 | 6 | 0 | 2.001672  | -0.645137 | 0.770390  |
| 23 | 6 | 0 | 1.607931  | 0.806016  | 1.178535  |
| 24 | 6 | 0 | 5.209898  | 1.363084  | -1.269350 |
| 25 | 6 | 0 | 5.292843  | 0.019528  | -1.206443 |
| 26 | 6 | 0 | 3.127801  | -0.840621 | -0.285540 |
| 27 | 6 | 0 | 2.550334  | 1.518530  | 2.233158  |
| 28 | 6 | 0 | 4.511121  | 1.905747  | -0.073484 |
| 29 | 6 | 0 | 4.622572  | -0.483044 | 0.065773  |
| 30 | 6 | 0 | 3.831604  | 0.746548  | 2.098270  |
| 31 | 6 | 0 | 4.436359  | 0.766911  | 0.886762  |
| 32 | 8 | 0 | 1.414186  | -3.814308 | -0.640565 |
| 33 | 6 | 0 | 5.794921  | -0.931506 | -2.238933 |
| 34 | 6 | 0 | 4.117935  | -0.311020 | 3.126759  |
| 35 | 8 | 0 | 4.119657  | 3.059211  | 0.081440  |
| 36 | 6 | 0 | -0.324122 | -1.948662 | 0.952154  |
| 37 | 1 | 0 | -4.104427 | 1.086626  | 1.119689  |
| 38 | 1 | 0 | -4.858315 | 2.895011  | -0.152300 |
| 39 | 1 | 0 | -5.274714 | 1.913923  | -1.541804 |
| 40 | 1 | 0 | 0.151955  | -1.532566 | -1.979939 |
| 41 | 1 | 0 | -3.731162 | -0.537279 | -1.416203 |
| 42 | 1 | 0 | -3.065272 | 1.827324  | -2.366773 |
| 43 | 1 | 0 | -3.257353 | 3.469219  | -1.783658 |
| 44 | 1 | 0 | 0.357769  | 1.076664  | -1.764470 |
| 45 | 1 | 0 | -0.119001 | 3.099038  | -0.921369 |
| 46 | 1 | 0 | -2.187937 | -0.145214 | 1.171575  |
| 47 | 1 | 0 | -7.254813 | 1.715256  | 0.185875  |
| 48 | 1 | 0 | -7.910417 | 0.018508  | 0.578297  |
| 49 | 1 | 0 | -2.444083 | -2.490855 | -1.807769 |
| 50 | 1 | 0 | -1.182676 | -3.515815 | -1.102786 |
| 51 | 1 | 0 | -2.692436 | -3.220418 | -0.214028 |
| 52 | 1 | 0 | -2.648804 | 2.380370  | 1.426624  |
| 53 | 1 | 0 | -0.982537 | 2.915987  | 1.222457  |
| 54 | 1 | 0 | -2.313874 | 3.955595  | 0.676863  |
| 55 | 1 | 0 | 2.302600  | -1.194531 | 1.670376  |
| 56 | 1 | 0 | 0.580201  | 0.796889  | 1.556108  |

|    |   |   |           |           |           |
|----|---|---|-----------|-----------|-----------|
| 57 | 1 | 0 | 1.606097  | 1.427675  | 0.280048  |
| 58 | 1 | 0 | 5.520894  | 1.991366  | -2.096661 |
| 59 | 1 | 0 | 2.856326  | -0.239224 | -1.163556 |
| 60 | 1 | 0 | 2.663381  | 2.566233  | 1.951113  |
| 61 | 1 | 0 | 2.136810  | 1.459873  | 3.244647  |
| 62 | 1 | 0 | 5.114161  | -1.344189 | 0.525277  |
| 63 | 1 | 0 | 6.631199  | -1.523147 | -1.842991 |
| 64 | 1 | 0 | 5.010219  | -1.651213 | -2.506272 |
| 65 | 1 | 0 | 6.130226  | -0.416553 | -3.143361 |
| 66 | 1 | 0 | 4.618880  | 0.174227  | 3.978103  |
| 67 | 1 | 0 | 3.209658  | -0.770866 | 3.532086  |
| 68 | 1 | 0 | 4.786727  | -1.093505 | 2.759204  |
| 69 | 1 | 0 | -0.461780 | -1.345447 | 1.855768  |
| 70 | 1 | 0 | -0.342114 | -3.007217 | 1.224394  |

Conformer 1b-4

| Center<br>Number | Atomic<br>Number | Atomic<br>Type | Coordinates (Angstroms) |           |           |
|------------------|------------------|----------------|-------------------------|-----------|-----------|
|                  |                  |                | X                       | Y         | Z         |
| 1                | 6                | 0              | -5.302369               | -1.255189 | 1.000985  |
| 2                | 6                | 0              | -5.601498               | 0.187832  | 0.765462  |
| 3                | 8                | 0              | -4.072246               | -1.526595 | 0.468851  |
| 4                | 6                | 0              | -4.332274               | 0.816892  | 0.260384  |
| 5                | 6                | 0              | -4.493052               | 2.014275  | -0.679451 |
| 6                | 6                | 0              | 0.006854                | -1.077087 | -1.285884 |
| 7                | 6                | 0              | -1.259983               | -1.613883 | -0.553535 |
| 8                | 6                | 0              | -3.580623               | -0.401543 | -0.310814 |
| 9                | 6                | 0              | -3.303513               | 2.304887  | -1.611419 |
| 10               | 6                | 0              | -0.234595               | 0.376072  | -1.490052 |
| 11               | 8                | 0              | -0.993926               | 2.854804  | -1.987182 |
| 12               | 6                | 0              | -2.065060               | -0.325811 | -0.151398 |
| 13               | 6                | 0              | -1.867364               | 2.228815  | -1.033236 |
| 14               | 6                | 0              | -1.380887               | 0.794004  | -0.937513 |
| 15               | 8                | 0              | -5.969357               | -2.090165 | 1.557650  |
| 16               | 6                | 0              | -6.806625               | 0.713299  | 0.979232  |
| 17               | 6                | 0              | -2.020420               | -2.668434 | -1.348965 |
| 18               | 6                | 0              | -1.718863               | 2.967335  | 0.308241  |
| 19               | 6                | 0              | 1.855859                | -2.672905 | -0.642344 |
| 20               | 6                | 0              | 0.910457                | -1.622859 | -0.087534 |
| 21               | 8                | 0              | 3.115484                | -2.147720 | -0.730703 |
| 22               | 6                | 0              | 1.875160                | -0.723257 | 0.703969  |
| 23               | 6                | 0              | 1.357957                | 0.677235  | 1.149667  |
| 24               | 6                | 0              | 5.199941                | 1.551588  | -0.852786 |
| 25               | 6                | 0              | 5.322151                | 0.209911  | -0.865535 |
| 26               | 6                | 0              | 3.109677                | -0.785048 | -0.241174 |
| 27               | 6                | 0              | 2.156551                | 1.387661  | 2.321417  |



|    |   |   |           |           |           |
|----|---|---|-----------|-----------|-----------|
| 28 | 6 | 0 | 4.364167  | 1.997494  | 0.294599  |
| 29 | 6 | 0 | 4.539487  | -0.394780 | 0.292754  |
| 30 | 6 | 0 | 3.476670  | 0.674353  | 2.291137  |
| 31 | 6 | 0 | 4.214737  | 0.793561  | 1.161507  |
| 32 | 8 | 0 | 1.597389  | -3.790257 | -1.011983 |
| 33 | 6 | 0 | 5.965927  | -0.656042 | -1.894622 |
| 34 | 6 | 0 | 3.689575  | -0.434953 | 3.282714  |
| 35 | 8 | 0 | 3.941015  | 3.133020  | 0.490180  |
| 36 | 6 | 0 | -0.363321 | -2.178192 | 0.586520  |
| 37 | 1 | 0 | -3.762353 | 1.132188  | 1.146218  |
| 38 | 1 | 0 | -4.706220 | 2.898700  | -0.067651 |
| 39 | 1 | 0 | -5.379632 | 1.856423  | -1.304983 |
| 40 | 1 | 0 | 0.246874  | -1.594917 | -2.220884 |
| 41 | 1 | 0 | -3.864452 | -0.580562 | -1.354573 |
| 42 | 1 | 0 | -3.329728 | 1.638111  | -2.480427 |
| 43 | 1 | 0 | -3.436102 | 3.320047  | -2.007906 |
| 44 | 1 | 0 | 0.428152  | 1.025174  | -2.048770 |
| 45 | 1 | 0 | -1.197971 | 3.802995  | -1.980036 |
| 46 | 1 | 0 | -1.911136 | -0.146245 | 0.925241  |
| 47 | 1 | 0 | -7.024284 | 1.761163  | 0.794853  |
| 48 | 1 | 0 | -7.610377 | 0.084970  | 1.351668  |
| 49 | 1 | 0 | -2.437366 | -2.241647 | -2.269811 |
| 50 | 1 | 0 | -1.326276 | -3.464802 | -1.636908 |
| 51 | 1 | 0 | -2.835851 | -3.107972 | -0.770719 |
| 52 | 1 | 0 | -2.103393 | 3.992292  | 0.223671  |
| 53 | 1 | 0 | -2.256201 | 2.480659  | 1.125733  |
| 54 | 1 | 0 | -0.659430 | 3.015582  | 0.574248  |
| 55 | 1 | 0 | 2.117778  | -1.314840 | 1.594375  |
| 56 | 1 | 0 | 0.306333  | 0.582882  | 1.439656  |
| 57 | 1 | 0 | 1.386161  | 1.346270  | 0.287064  |
| 58 | 1 | 0 | 5.577113  | 2.241261  | -1.599833 |
| 59 | 1 | 0 | 2.898598  | -0.127201 | -1.094787 |
| 60 | 1 | 0 | 2.253483  | 2.448495  | 2.086708  |
| 61 | 1 | 0 | 1.644045  | 1.275071  | 3.281840  |
| 62 | 1 | 0 | 5.015736  | -1.264828 | 0.752092  |
| 63 | 1 | 0 | 6.377281  | -0.072512 | -2.722895 |
| 64 | 1 | 0 | 6.776101  | -1.247820 | -1.447785 |
| 65 | 1 | 0 | 5.241042  | -1.379029 | -2.290572 |
| 66 | 1 | 0 | 4.414496  | -1.179049 | 2.942522  |
| 67 | 1 | 0 | 4.089686  | 0.012561  | 4.205213  |
| 68 | 1 | 0 | 2.759345  | -0.938296 | 3.568525  |
| 69 | 1 | 0 | -0.561878 | -1.761970 | 1.579570  |
| 70 | 1 | 0 | -0.364776 | -3.269233 | 0.650872  |

**S86. Experimental and calculated <sup>13</sup>C NMR chemical shifts of 1a and 1b**

| NO. | $\delta_{\text{exptl.}}$ | $\delta_{\text{calcd.}}$ (ppm) |           | NO. | $\delta_{\text{exptl.}}$ | $\delta_{\text{calcd.}}$ (ppm) |           |
|-----|--------------------------|--------------------------------|-----------|-----|--------------------------|--------------------------------|-----------|
|     |                          | <b>1a</b>                      | <b>1b</b> |     |                          | <b>1a</b>                      | <b>1b</b> |
| 1   | 153.5                    | 153.1                          | 154.6     | 1'  | 131.9                    | 132.3                          | 134.0     |
| 2   | 124.2                    | 126.0                          | 126.9     | 2'  | 196                      | 192.1                          | 189.2     |
| 3   | 55.3                     | 56.1                           | 60.5      | 3'  | 135.9                    | 133.2                          | 129.9     |
| 4   | 41.7                     | 46.7                           | 47.1      | 4'  | 170                      | 174.6                          | 174.8     |
| 5   | 62.2                     | 65.5                           | 67.4      | 5'  | 52.9                     | 55.5                           | 58.6      |
| 6   | 82.7                     | 82.7                           | 81.5      | 6'  | 81.9                     | 81.7                           | 95.3      |
| 7   | 44.3                     | 49.2                           | 51.0      | 7'  | 57.2                     | 58.6                           | 53.9      |
| 8   | 23.5                     | 25.3                           | 26.4      | 8'  | 23.7                     | 27.2                           | 36.8      |
| 9   | 35.6                     | 39.4                           | 40.9      | 9'  | 37.5                     | 39.2                           | 38.8      |
| 10  | 72                       | 75.2                           | 75.2      | 10' | 152.2                    | 157.3                          | 174.6     |
| 11  | 141.1                    | 141.6                          | 141.6     | 11' | 47                       | 52.9                           | 53.5      |
| 12  | 170.9                    | 168.1                          | 168.4     | 12' | 177.6                    | 176.9                          | 179.4     |
| 13  | 119                      | 120.1                          | 120.7     | 13' | 38.6                     | 40.5                           | 42.7      |
| 14  | 32.2                     | 27.3                           | 27.5      | 14' | 21.8                     | 21.2                           | 35.5      |
| 15  | 21.9                     | 23.7                           | 23.5      | 15' | 20                       | 22.8                           | 21.4      |
|     |                          |                                |           |     | <b>R<sup>2</sup></b>     | 0.9980                         | 0.9884    |
|     |                          |                                |           |     | <b>MAE</b>               | 2.5                            | 5.2       |
|     |                          |                                |           |     | <b>CMAE</b>              | 1.9                            | 4.6       |

**S87. Experimental and calculated <sup>1</sup>H NMR chemical shifts of 1a and 1b**

| NO. | $\delta_{\text{exptl.}}$ | $\delta_{\text{calcd.}}$ (ppm) |           | NO.  | $\delta_{\text{exptl.}}$ | $\delta_{\text{calcd.}}$ (ppm) |           |
|-----|--------------------------|--------------------------------|-----------|------|--------------------------|--------------------------------|-----------|
|     |                          | <b>1a</b>                      | <b>1b</b> |      |                          | <b>1a</b>                      | <b>1b</b> |
| 2   | 5.64                     | 6.16                           | 6.18      | 3'   | 6.16                     | 6.21                           | 6.32      |
| 3   | 2.89                     | 2.76                           | 2.98      | 5'   | 3.37                     | 4.07                           | 3.41      |
| 5   | 3.43                     | 3.13                           | 2.81      | 6'   | 3.51                     | 3.51                           | 3.41      |
| 6   | 4.04                     | 4.36                           | 3.99      | 7'   | 2.21                     | 2.33                           | 2.10      |
| 7   | 3.69                     | 3.06                           | 3.18      | 8'a  | 2.09                     | 2.18                           | 1.54      |
| 8a  | 2.34                     | 2.28                           | 2.24      | 8'b  | 1.57                     | 2.05                           | 2.04      |
| 8b  | 1.5                      | 1.77                           | 1.50      | 9'a  | 2.44                     | 4.71                           | 2.29      |
| 9a  | 2.11                     | 1.87                           | 1.91      | 9'b  | 2.44                     | 2.65                           | 2.38      |
| 9b  | 1.67                     | 1.80                           | 1.65      | 13'a | 2.21                     | 2.63                           | 1.70      |
| 13a | 6.14                     | 6.68                           | 6.51      | 13'b | 2.01                     | 1.97                           | 2.29      |
| 13b | 5.42                     | 6.04                           | 5.90      | 14'a | 2.46                     | 2.42                           | 1.52      |
| 14a | 1.58                     | 1.53                           | 1.33      | 14'b | 2.46                     | 2.32                           | 4.51      |
| 14b | 1.58                     | 1.41                           | 1.69      | 14'c | 2.46                     | 2.59                           | 1.65      |
| 14c | 1.58                     | 1.45                           | 1.26      | 15'a | 2.26                     | 2.49                           | 2.26      |
| 15a | 1.33                     | 1.18                           | 1.05      | 15'b | 2.26                     | 2.51                           | 2.04      |
| 15b | 1.33                     | 1.32                           | 1.26      | 15'c | 2.26                     | 2.55                           | 2.82      |
| 15c | 1.33                     | 1.77                           | 1.53      |      |                          |                                |           |

**S88. Linear regression analysis between the experimental and calculated <sup>13</sup>C NMR chemical shifts of 1a/1b.**

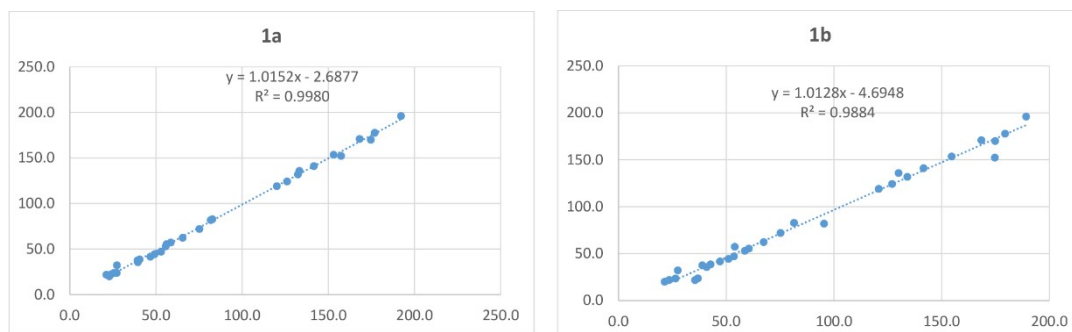

**S89. DP4+ probability analysis of 1a/1b.**

| Functional       | Solvent? |          | Basis Set    |          | Type of Data    |          |
|------------------|----------|----------|--------------|----------|-----------------|----------|
| mPW1PW91         | PCM      |          | 6-311G(d, p) |          | Unscaled Shifts |          |
|                  | Isomer 1 | Isomer 2 | Isomer 3     | Isomer 4 | Isomer 5        | Isomer 6 |
| sDP4+ (H data)   | 77.46%   | 22.54%   |              |          |                 |          |
| sDP4+ (C data)   | 100.00%  | 0.00%    |              |          |                 |          |
| sDP4+ (all data) | 100.00%  | 0.00%    |              |          |                 |          |
| uDP4+ (H data)   | 93.86%   | 6.14%    |              |          |                 |          |
| uDP4+ (C data)   | 100.00%  | 0.00%    |              |          |                 |          |
| uDP4+ (all data) | 100.00%  | 0.00%    |              |          |                 |          |
| DP4+ (H data)    | 98.13%   | 1.87%    |              |          |                 |          |
| DP4+ (C data)    | 100.00%  | 0.00%    |              |          |                 |          |
| DP4+ (all data)  | 100.00%  | 0.00%    |              |          |                 |          |

**S90. Structures of two possible diastereoisomers of 6 (6a–6b).**

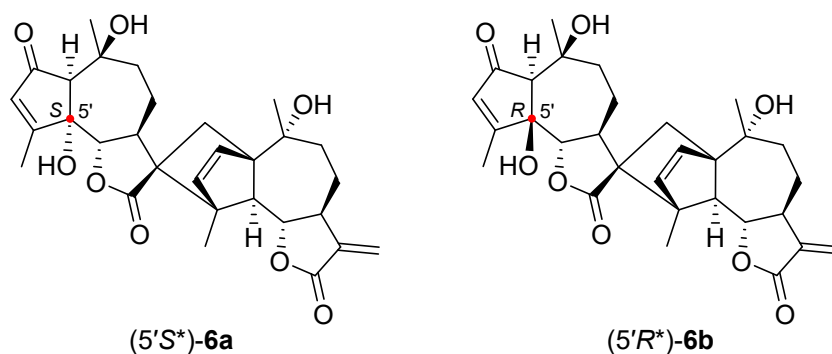

**S91. Conformational analysis of the B3LYP-D3BJ/6-31G(d) optimized conformers of 6a in the gas phase (T=298.15 K)**

| Conformer   | E (Hartree) <sup>a</sup> | G (kcal/mol) <sup>b</sup> | $\Delta$ G (kcal/mol) <sup>c</sup> | Population <sup>d</sup> |
|-------------|--------------------------|---------------------------|------------------------------------|-------------------------|
| <b>6a-1</b> | -1766.49643              | -1108494.174971           | 0.00                               | 56.19%                  |
| <b>6a-2</b> | -1766.496092             | -1108493.962440           | 0.212531                           | 39.41%                  |
| <b>6a-3</b> | -1766.493678             | -1108492.447631           | 1.727341                           | 3.03%                   |
| <b>6a-4</b> | -1766.492919             | -1108491.971759           | 2.203213                           | 1.37%                   |

<sup>a</sup>Electronic energy obtained at M06-2X-D3/6-311+G(2d,p) level of theory;

<sup>b</sup>Gibbs free energy (E\*627.51);

<sup>c</sup>The relative Gibbs free energy;

<sup>d</sup>The Boltzmann distribution of each conformer.

**S92 Cartesian coordinates for the low-energy Conf. of Compound 6a at B3LYP/6311+G(d,p) level of theory in methanol**

Conformer 6a-1

| Center Number | Atomic Number | Atomic Type | Coordinates (Angstroms) |           |           |
|---------------|---------------|-------------|-------------------------|-----------|-----------|
|               |               |             | X                       | Y         | Z         |
| 1             | 6             | 0           | 4.507505                | 1.606385  | -1.896800 |
| 2             | 6             | 0           | 5.073275                | 1.697994  | -0.518148 |
| 3             | 8             | 0           | 3.529252                | 0.651481  | -1.897132 |
| 4             | 6             | 0           | 4.186375                | 0.881265  | 0.378588  |
| 5             | 6             | 0           | 4.859718                | 0.198047  | 1.570607  |
| 6             | 6             | 0           | 1.821412                | -2.608204 | -0.899367 |
| 7             | 6             | 0           | 1.213374                | -1.242647 | -1.212623 |
| 8             | 6             | 0           | 3.497584                | -0.061868 | -0.628685 |
| 9             | 6             | 0           | 4.108260                | -1.007752 | 2.166420  |
| 10            | 6             | 0           | 2.201085                | -2.618190 | 0.381040  |
| 11            | 8             | 0           | 2.297019                | 0.470961  | 2.667273  |
| 12            | 6             | 0           | 2.056674                | -0.344436 | -0.255637 |
| 13            | 6             | 0           | 2.573095                | -0.893569 | 2.306974  |
| 14            | 6             | 0           | 1.854495                | -1.261188 | 0.986872  |
| 15            | 8             | 0           | 4.803328                | 2.231089  | -2.885037 |
| 16            | 6             | 0           | 6.178026                | 2.392923  | -0.249972 |

|    |   |   |           |           |           |
|----|---|---|-----------|-----------|-----------|
| 17 | 6 | 0 | 1.120507  | -0.891277 | -2.689300 |
| 18 | 6 | 0 | 2.107177  | -1.814835 | 3.444055  |
| 19 | 8 | 0 | -3.692017 | 0.159914  | -2.149821 |
| 20 | 6 | 0 | -1.084772 | -2.370733 | -0.744819 |
| 21 | 6 | 0 | -0.162675 | -1.195573 | -0.437546 |
| 22 | 8 | 0 | -2.380677 | -1.982253 | -0.532214 |
| 23 | 6 | 0 | -1.131529 | -0.023070 | -0.769874 |
| 24 | 6 | 0 | -0.743473 | 1.399870  | -0.380996 |
| 25 | 6 | 0 | -5.616049 | -0.371486 | 0.705668  |
| 26 | 6 | 0 | -4.944846 | -0.898719 | -0.334838 |
| 27 | 6 | 0 | -2.437051 | -0.572547 | -0.177477 |
| 28 | 6 | 0 | -1.842379 | 2.444324  | -0.600066 |
| 29 | 6 | 0 | -5.056106 | 0.931446  | 1.066659  |
| 30 | 6 | 0 | -3.757049 | -0.003966 | -0.736269 |
| 31 | 6 | 0 | -3.031841 | 2.363028  | 0.373738  |
| 32 | 6 | 0 | -4.117487 | 1.352782  | -0.076703 |
| 33 | 8 | 0 | -0.829989 | -3.484908 | -1.122446 |
| 34 | 6 | 0 | 0.286532  | -1.242349 | 1.065569  |
| 35 | 6 | 0 | -5.283022 | -2.153874 | -1.067936 |
| 36 | 6 | 0 | -3.681852 | 3.752539  | 0.482178  |
| 37 | 8 | 0 | -5.270170 | 1.572290  | 2.088258  |
| 38 | 8 | 0 | -2.500998 | 1.977648  | 1.650958  |
| 39 | 1 | 0 | 3.402176  | 1.537888  | 0.775892  |
| 40 | 1 | 0 | 5.001551  | 0.950870  | 2.352112  |
| 41 | 1 | 0 | 5.860027  | -0.142219 | 1.275217  |
| 42 | 1 | 0 | 1.830548  | -3.436731 | -1.595722 |
| 43 | 1 | 0 | 4.066975  | -0.986105 | -0.768455 |
| 44 | 1 | 0 | 4.317294  | -1.902560 | 1.570400  |
| 45 | 1 | 0 | 4.532720  | -1.198437 | 3.158472  |
| 46 | 1 | 0 | 2.573050  | -3.467646 | 0.943492  |
| 47 | 1 | 0 | 1.370010  | 0.524407  | 2.946926  |
| 48 | 1 | 0 | 1.581656  | 0.623519  | -0.095322 |
| 49 | 1 | 0 | 6.597969  | 2.449617  | 0.749944  |
| 50 | 1 | 0 | 6.686406  | 2.928215  | -1.046639 |
| 51 | 1 | 0 | 0.797089  | 0.141538  | -2.846586 |
| 52 | 1 | 0 | 2.092246  | -0.998852 | -3.175078 |
| 53 | 1 | 0 | 0.409615  | -1.560109 | -3.189749 |
| 54 | 1 | 0 | 2.354914  | -2.862362 | 3.243656  |
| 55 | 1 | 0 | 2.595673  | -1.517459 | 4.376732  |
| 56 | 1 | 0 | 1.023012  | -1.752988 | 3.591548  |
| 57 | 1 | 0 | -3.384790 | -0.683249 | -2.523841 |
| 58 | 1 | 0 | -1.275428 | -0.029939 | -1.857135 |
| 59 | 1 | 0 | 0.113740  | 1.693712  | -0.995360 |
| 60 | 1 | 0 | -0.424913 | 1.454811  | 0.662328  |

|    |   |   |           |           |           |
|----|---|---|-----------|-----------|-----------|
| 61 | 1 | 0 | -6.455042 | -0.819141 | 1.227164  |
| 62 | 1 | 0 | -2.452991 | -0.487436 | 0.912551  |
| 63 | 1 | 0 | -1.381203 | 3.430990  | -0.477704 |
| 64 | 1 | 0 | -2.221815 | 2.395031  | -1.627052 |
| 65 | 1 | 0 | -4.750285 | 1.847489  | -0.825349 |
| 66 | 1 | 0 | -0.081461 | -0.361841 | 1.601761  |
| 67 | 1 | 0 | -0.093505 | -2.125865 | 1.582996  |
| 68 | 1 | 0 | -6.215425 | -2.586835 | -0.696472 |
| 69 | 1 | 0 | -5.408183 | -1.933920 | -2.135759 |
| 70 | 1 | 0 | -4.479852 | -2.890607 | -0.979364 |
| 71 | 1 | 0 | -2.962073 | 4.451907  | 0.918534  |
| 72 | 1 | 0 | -3.971799 | 4.125481  | -0.506895 |
| 73 | 1 | 0 | -4.571080 | 3.720525  | 1.117053  |
| 74 | 1 | 0 | -3.252609 | 2.032628  | 2.269127  |

Conformer 6a-2

| Center<br>Number | Atomic<br>Number | Atomic<br>Type | Coordinates (Angstroms) |           |           |
|------------------|------------------|----------------|-------------------------|-----------|-----------|
|                  |                  |                | X                       | Y         | Z         |
| 1                | 6                | 0              | 4.499172                | 1.686765  | -1.852827 |
| 2                | 6                | 0              | 5.078175                | 1.726072  | -0.476669 |
| 3                | 8                | 0              | 3.521378                | 0.733042  | -1.880227 |
| 4                | 6                | 0              | 4.198737                | 0.875880  | 0.395816  |
| 5                | 6                | 0              | 4.884803                | 0.148407  | 1.554353  |
| 6                | 6                | 0              | 1.828758                | -2.565437 | -0.986150 |
| 7                | 6                | 0              | 1.212347                | -1.191712 | -1.241824 |
| 8                | 6                | 0              | 3.500384                | -0.028827 | -0.639879 |
| 9                | 6                | 0              | 4.142452                | -1.080931 | 2.112836  |
| 10               | 6                | 0              | 2.225616                | -2.620550 | 0.287922  |
| 11               | 8                | 0              | 2.204780                | 0.364707  | 2.617007  |
| 12               | 6                | 0              | 2.063671                | -0.326009 | -0.262609 |
| 13               | 6                | 0              | 2.601937                | -0.973787 | 2.267299  |
| 14               | 6                | 0              | 1.875804                | -1.290262 | 0.945992  |
| 15               | 8                | 0              | 4.787762                | 2.349002  | -2.818463 |
| 16               | 6                | 0              | 6.186631                | 2.408935  | -0.193448 |
| 17               | 6                | 0              | 1.104004                | -0.786459 | -2.703554 |
| 18               | 6                | 0              | 2.143204                | -1.935445 | 3.373191  |
| 19               | 8                | 0              | -3.679856               | 0.177127  | -2.138769 |
| 20               | 6                | 0              | -1.072235               | -2.347371 | -0.785550 |
| 21               | 6                | 0              | -0.155679               | -1.176767 | -0.448910 |
| 22               | 8                | 0              | -2.368946               | -1.974691 | -0.553951 |
| 23               | 6                | 0              | -1.132457               | 0.000423  | -0.737954 |
| 24               | 6                | 0              | -0.757628               | 1.410348  | -0.294072 |
| 25               | 6                | 0              | -5.635919               | -0.404432 | 0.680352  |
| 26               | 6                | 0              | -4.942108               | -0.915455 | -0.353157 |
| 27               | 6                | 0              | -2.436643               | -0.573768 | -0.166708 |

|    |   |   |           |           |           |
|----|---|---|-----------|-----------|-----------|
| 28 | 6 | 0 | -1.855979 | 2.456261  | -0.513084 |
| 29 | 6 | 0 | -5.096551 | 0.900885  | 1.062648  |
| 30 | 6 | 0 | -3.756726 | -0.005469 | -0.727473 |
| 31 | 6 | 0 | -3.068148 | 2.352170  | 0.429991  |
| 32 | 6 | 0 | -4.137269 | 1.340378  | -0.056744 |
| 33 | 8 | 0 | -0.813734 | -3.449481 | -1.196228 |
| 34 | 6 | 0 | 0.310464  | -1.271005 | 1.046681  |
| 35 | 6 | 0 | -5.259289 | -2.166141 | -1.103486 |
| 36 | 6 | 0 | -3.731144 | 3.735960  | 0.539392  |
| 37 | 8 | 0 | -5.342044 | 1.532276  | 2.083054  |
| 38 | 8 | 0 | -2.563753 | 1.954895  | 1.712284  |
| 39 | 1 | 0 | 3.416684  | 1.515698  | 0.823428  |
| 40 | 1 | 0 | 5.040054  | 0.875645  | 2.359480  |
| 41 | 1 | 0 | 5.883732  | -0.176196 | 1.238094  |
| 42 | 1 | 0 | 1.829207  | -3.369124 | -1.710908 |
| 43 | 1 | 0 | 4.068642  | -0.946637 | -0.820590 |
| 44 | 1 | 0 | 4.354174  | -1.953697 | 1.485176  |
| 45 | 1 | 0 | 4.579184  | -1.311105 | 3.093234  |
| 46 | 1 | 0 | 2.604266  | -3.489879 | 0.814658  |
| 47 | 1 | 0 | 2.504692  | 0.534338  | 3.523817  |
| 48 | 1 | 0 | 1.587311  | 0.633221  | -0.060560 |
| 49 | 1 | 0 | 6.617744  | 2.427451  | 0.803229  |
| 50 | 1 | 0 | 6.687646  | 2.973281  | -0.974555 |
| 51 | 1 | 0 | 0.779153  | 0.251320  | -2.819281 |
| 52 | 1 | 0 | 2.070232  | -0.876700 | -3.203927 |
| 53 | 1 | 0 | 0.387266  | -1.436284 | -3.220474 |
| 54 | 1 | 0 | 2.398736  | -2.973589 | 3.137087  |
| 55 | 1 | 0 | 2.641114  | -1.684161 | 4.318322  |
| 56 | 1 | 0 | 1.063680  | -1.869626 | 3.529067  |
| 57 | 1 | 0 | -3.357020 | -0.657523 | -2.518752 |
| 58 | 1 | 0 | -1.275575 | 0.032740  | -1.824910 |
| 59 | 1 | 0 | 0.111533  | 1.727043  | -0.879909 |
| 60 | 1 | 0 | -0.463651 | 1.431713  | 0.757667  |
| 61 | 1 | 0 | -6.480367 | -0.864303 | 1.182121  |
| 62 | 1 | 0 | -2.460597 | -0.512840 | 0.924862  |
| 63 | 1 | 0 | -1.401719 | 3.441367  | -0.356579 |
| 64 | 1 | 0 | -2.211317 | 2.430676  | -1.549807 |
| 65 | 1 | 0 | -4.758392 | 1.840796  | -0.811434 |
| 66 | 1 | 0 | -0.023401 | -0.408956 | 1.627392  |
| 67 | 1 | 0 | -0.063197 | -2.173935 | 1.534972  |
| 68 | 1 | 0 | -6.196685 | -2.606595 | -0.753864 |
| 69 | 1 | 0 | -5.364761 | -1.937614 | -2.171608 |
| 70 | 1 | 0 | -4.454232 | -2.899527 | -1.006192 |
| 71 | 1 | 0 | -3.026978 | 4.434697  | 1.001522  |

|    |   |   |           |          |           |
|----|---|---|-----------|----------|-----------|
| 72 | 1 | 0 | -4.000246 | 4.119243 | -0.451698 |
| 73 | 1 | 0 | -4.634877 | 3.689771 | 1.152519  |
| 74 | 1 | 0 | -3.327020 | 1.998318 | 2.316471  |

Conformer 6a-3

| Center<br>Number | Atomic<br>Number | Atomic<br>Type | Coordinates (Angstroms) |           |           |
|------------------|------------------|----------------|-------------------------|-----------|-----------|
|                  |                  |                | X                       | Y         | Z         |
| 1                | 6                | 0              | 4.490495                | 1.655175  | -1.902078 |
| 2                | 6                | 0              | 5.081298                | 1.713958  | -0.531464 |
| 3                | 8                | 0              | 3.511653                | 0.703349  | -1.907451 |
| 4                | 6                | 0              | 4.207133                | 0.879235  | 0.360783  |
| 5                | 6                | 0              | 4.901202                | 0.168809  | 1.524984  |
| 6                | 6                | 0              | 1.815903                | -2.578141 | -0.943057 |
| 7                | 6                | 0              | 1.201734                | -1.207498 | -1.218429 |
| 8                | 6                | 0              | 3.497886                | -0.039640 | -0.654986 |
| 9                | 6                | 0              | 4.159171                | -1.047652 | 2.111242  |
| 10               | 6                | 0              | 2.225143                | -2.611327 | 0.327842  |
| 11               | 8                | 0              | 2.231088                | 0.413407  | 2.606903  |
| 12               | 6                | 0              | 2.063453                | -0.326854 | -0.261841 |
| 13               | 6                | 0              | 2.620338                | -0.932431 | 2.275351  |
| 14               | 6                | 0              | 1.882951                | -1.268887 | 0.965426  |
| 15               | 8                | 0              | 4.772441                | 2.303510  | -2.879389 |
| 16               | 6                | 0              | 6.193918                | 2.397960  | -0.268025 |
| 17               | 6                | 0              | 1.085150                | -0.827803 | -2.686392 |
| 18               | 6                | 0              | 2.166868                | -1.873694 | 3.400801  |
| 19               | 8                | 0              | -3.518855               | 0.173828  | -2.166309 |
| 20               | 6                | 0              | -1.085446               | -2.347699 | -0.713716 |
| 21               | 6                | 0              | -0.159717               | -1.171821 | -0.415409 |
| 22               | 8                | 0              | -2.373369               | -1.969989 | -0.469215 |
| 23               | 6                | 0              | -1.128826               | 0.005816  | -0.723313 |
| 24               | 6                | 0              | -0.763284               | 1.413985  | -0.257922 |
| 25               | 6                | 0              | -5.661373               | -0.437219 | 0.554045  |
| 26               | 6                | 0              | -4.927902               | -0.906965 | -0.474160 |
| 27               | 6                | 0              | -2.442842               | -0.557074 | -0.164123 |
| 28               | 6                | 0              | -1.864504               | 2.465923  | -0.442138 |
| 29               | 6                | 0              | -5.130421               | 0.845345  | 1.021991  |
| 30               | 6                | 0              | -3.737587               | 0.019458  | -0.768303 |
| 31               | 6                | 0              | -3.085482               | 2.335058  | 0.489201  |
| 32               | 6                | 0              | -4.145441               | 1.340273  | -0.048843 |
| 33               | 8                | 0              | -0.827409               | -3.464434 | -1.084929 |
| 34               | 6                | 0              | 0.318271                | -1.246794 | 1.077770  |
| 35               | 6                | 0              | -5.176035               | -2.147579 | -1.264774 |
| 36               | 6                | 0              | -3.749882               | 3.714249  | 0.639589  |
| 37               | 8                | 0              | -5.393428               | 1.419233  | 2.071523  |
| 38               | 8                | 0              | -2.598908               | 1.896912  | 1.763533  |



|    |   |   |           |           |           |
|----|---|---|-----------|-----------|-----------|
| 39 | 1 | 0 | 3.429883  | 1.527231  | 0.784898  |
| 40 | 1 | 0 | 5.066829  | 0.909175  | 2.316052  |
| 41 | 1 | 0 | 5.895935  | -0.165010 | 1.204981  |
| 42 | 1 | 0 | 1.806113  | -3.395170 | -1.652623 |
| 43 | 1 | 0 | 4.062016  | -0.961753 | -0.826298 |
| 44 | 1 | 0 | 4.362745  | -1.932096 | 1.497464  |
| 45 | 1 | 0 | 4.602880  | -1.261827 | 3.092214  |
| 46 | 1 | 0 | 2.604270  | -3.472703 | 0.867231  |
| 47 | 1 | 0 | 2.539500  | 0.595421  | 3.508452  |
| 48 | 1 | 0 | 1.590648  | 0.637279  | -0.074181 |
| 49 | 1 | 0 | 6.633682  | 2.430222  | 0.724529  |
| 50 | 1 | 0 | 6.689705  | 2.948980  | -1.061894 |
| 51 | 1 | 0 | 0.774936  | 0.212560  | -2.817679 |
| 52 | 1 | 0 | 2.045380  | -0.941932 | -3.193830 |
| 53 | 1 | 0 | 0.352329  | -1.474373 | -3.183683 |
| 54 | 1 | 0 | 2.417235  | -2.916485 | 3.180241  |
| 55 | 1 | 0 | 2.672537  | -1.608152 | 4.337984  |
| 56 | 1 | 0 | 1.088690  | -1.801750 | 3.562951  |
| 57 | 1 | 0 | -4.339350 | 0.509438  | -2.560609 |
| 58 | 1 | 0 | -1.258666 | 0.034301  | -1.809812 |
| 59 | 1 | 0 | 0.099310  | 1.749773  | -0.843035 |
| 60 | 1 | 0 | -0.460111 | 1.417991  | 0.791513  |
| 61 | 1 | 0 | -6.514596 | -0.924730 | 1.013214  |
| 62 | 1 | 0 | -2.497109 | -0.442483 | 0.922088  |
| 63 | 1 | 0 | -1.410639 | 3.445316  | -0.251583 |
| 64 | 1 | 0 | -2.214072 | 2.475325  | -1.481226 |
| 65 | 1 | 0 | -4.758247 | 1.882688  | -0.783626 |
| 66 | 1 | 0 | -0.011917 | -0.379649 | 1.652744  |
| 67 | 1 | 0 | -0.050838 | -2.144592 | 1.578778  |
| 68 | 1 | 0 | -6.187899 | -2.527464 | -1.099568 |
| 69 | 1 | 0 | -5.028344 | -1.954320 | -2.332573 |
| 70 | 1 | 0 | -4.448008 | -2.917596 | -0.992920 |
| 71 | 1 | 0 | -3.051270 | 4.396621  | 1.133210  |
| 72 | 1 | 0 | -4.009962 | 4.134019  | -0.339342 |
| 73 | 1 | 0 | -4.659699 | 3.645346  | 1.242245  |
| 74 | 1 | 0 | -3.372617 | 1.906875  | 2.356061  |

Conformer 6a-4

| Center<br>Number | Atomic<br>Number | Atomic<br>Type | Coordinates (Angstroms) |          |           |
|------------------|------------------|----------------|-------------------------|----------|-----------|
|                  |                  |                | X                       | Y        | Z         |
| 1                | 6                | 0              | 4.558528                | 1.629550 | -1.874809 |
| 2                | 6                | 0              | 5.125690                | 1.701729 | -0.495146 |
| 3                | 8                | 0              | 3.546104                | 0.710365 | -1.873818 |
| 4                | 6                | 0              | 4.203345                | 0.917818 | 0.397532  |
| 5                | 6                | 0              | 4.831619                | 0.240351 | 1.622231  |

|    |   |   |           |           |           |
|----|---|---|-----------|-----------|-----------|
| 6  | 6 | 0 | 1.838759  | -2.541776 | -0.981029 |
| 7  | 6 | 0 | 1.216554  | -1.169593 | -1.231642 |
| 8  | 6 | 0 | 3.505910  | -0.015227 | -0.613452 |
| 9  | 6 | 0 | 4.124442  | -1.024425 | 2.142489  |
| 10 | 6 | 0 | 2.227709  | -2.602792 | 0.294896  |
| 11 | 8 | 0 | 2.155385  | 0.291800  | 2.829408  |
| 12 | 6 | 0 | 2.064931  | -0.308488 | -0.244096 |
| 13 | 6 | 0 | 2.581833  | -0.973860 | 2.300686  |
| 14 | 6 | 0 | 1.867895  | -1.279694 | 0.964090  |
| 15 | 8 | 0 | 4.877772  | 2.244399  | -2.860925 |
| 16 | 6 | 0 | 6.253507  | 2.354047  | -0.218333 |
| 17 | 6 | 0 | 1.111040  | -0.757063 | -2.691671 |
| 18 | 6 | 0 | 2.166493  | -1.985565 | 3.373455  |
| 19 | 8 | 0 | -3.676463 | 0.174099  | -2.148413 |
| 20 | 6 | 0 | -1.064386 | -2.336015 | -0.795285 |
| 21 | 6 | 0 | -0.155140 | -1.163269 | -0.445039 |
| 22 | 8 | 0 | -2.363325 | -1.971683 | -0.565488 |
| 23 | 6 | 0 | -1.136662 | 0.009852  | -0.734349 |
| 24 | 6 | 0 | -0.772723 | 1.420194  | -0.283888 |
| 25 | 6 | 0 | -5.644782 | -0.417701 | 0.661070  |
| 26 | 6 | 0 | -4.943826 | -0.925221 | -0.369251 |
| 27 | 6 | 0 | -2.440750 | -0.573188 | -0.171509 |
| 28 | 6 | 0 | -1.873149 | 2.462011  | -0.512431 |
| 29 | 6 | 0 | -5.113560 | 0.890183  | 1.046214  |
| 30 | 6 | 0 | -3.760670 | -0.009732 | -0.737584 |
| 31 | 6 | 0 | -3.090044 | 2.351544  | 0.423911  |
| 32 | 6 | 0 | -4.150849 | 1.334168  | -0.068680 |
| 33 | 8 | 0 | -0.797669 | -3.432404 | -1.215337 |
| 34 | 6 | 0 | 0.302811  | -1.265924 | 1.051793  |
| 35 | 6 | 0 | -5.252193 | -2.177213 | -1.121249 |
| 36 | 6 | 0 | -3.760583 | 3.731827  | 0.530172  |
| 37 | 8 | 0 | -5.367032 | 1.521068  | 2.064638  |
| 38 | 8 | 0 | -2.587814 | 1.956561  | 1.707277  |
| 39 | 1 | 0 | 3.431379  | 1.627924  | 0.737955  |
| 40 | 1 | 0 | 4.886942  | 0.977018  | 2.430421  |
| 41 | 1 | 0 | 5.865189  | -0.032912 | 1.379644  |
| 42 | 1 | 0 | 1.848502  | -3.339337 | -1.712408 |
| 43 | 1 | 0 | 4.075341  | -0.938112 | -0.755816 |
| 44 | 1 | 0 | 4.370417  | -1.873771 | 1.494609  |
| 45 | 1 | 0 | 4.561342  | -1.252403 | 3.121137  |
| 46 | 1 | 0 | 2.610568  | -3.471551 | 0.818605  |
| 47 | 1 | 0 | 2.233860  | 0.956726  | 2.129480  |
| 48 | 1 | 0 | 1.582577  | 0.654719  | -0.059128 |
| 49 | 1 | 0 | 6.668047  | 2.395836  | 0.784508  |

|    |   |   |           |           |           |
|----|---|---|-----------|-----------|-----------|
| 50 | 1 | 0 | 6.788091  | 2.867736  | -1.011988 |
| 51 | 1 | 0 | 0.787561  | 0.281638  | -2.803884 |
| 52 | 1 | 0 | 2.076475  | -0.848443 | -3.192748 |
| 53 | 1 | 0 | 0.392374  | -1.403507 | -3.209841 |
| 54 | 1 | 0 | 2.503330  | -2.995258 | 3.119755  |
| 55 | 1 | 0 | 2.618832  | -1.700187 | 4.327743  |
| 56 | 1 | 0 | 1.081968  | -1.998368 | 3.504411  |
| 57 | 1 | 0 | -3.359169 | -0.662825 | -2.528120 |
| 58 | 1 | 0 | -1.275003 | 0.046189  | -1.821671 |
| 59 | 1 | 0 | 0.102016  | 1.742154  | -0.858990 |
| 60 | 1 | 0 | -0.496556 | 1.439524  | 0.773133  |
| 61 | 1 | 0 | -6.489371 | -0.881674 | 1.158731  |
| 62 | 1 | 0 | -2.470258 | -0.517493 | 0.920163  |
| 63 | 1 | 0 | -1.424826 | 3.449504  | -0.353713 |
| 64 | 1 | 0 | -2.220577 | 2.433015  | -1.551599 |
| 65 | 1 | 0 | -4.770661 | 1.831443  | -0.826460 |
| 66 | 1 | 0 | -0.038949 | -0.412806 | 1.642075  |
| 67 | 1 | 0 | -0.068544 | -2.173065 | 1.532912  |
| 68 | 1 | 0 | -6.188140 | -2.622655 | -0.774204 |
| 69 | 1 | 0 | -5.356621 | -1.948906 | -2.189573 |
| 70 | 1 | 0 | -4.443933 | -2.906807 | -1.022366 |
| 71 | 1 | 0 | -3.062682 | 4.434222  | 0.996269  |
| 72 | 1 | 0 | -4.026960 | 4.113926  | -0.462119 |
| 73 | 1 | 0 | -4.666895 | 3.680418  | 1.138906  |
| 74 | 1 | 0 | -3.351815 | 1.995263  | 2.310868  |

**S93. Conformational analysis of the B3LYP-D3BJ/6-31G(d) optimized conformers of 6b in the gas phase (T=298.15 K)**

| Conformer   | E (Hartree) <sup>a</sup> | G (kcal/mol) <sup>b</sup> | $\Delta G$ (kcal/mol) <sup>c</sup> | Population <sup>d</sup> |
|-------------|--------------------------|---------------------------|------------------------------------|-------------------------|
| <b>6b-1</b> | -1766.484564             | -1108486.729019           | 0.00                               | 67.45%                  |
| <b>6b-2</b> | -1766.483782             | -1108486.238269           | 0.490750                           | 29.48%                  |
| <b>6b-3</b> | -1766.481114             | -1108484.563921           | 2.165098                           | 1.73%                   |
| <b>6b-4</b> | -1766.480862             | -1108484.405463           | 2.323557                           | 1.34%                   |

<sup>a</sup>Electronic energy obtained at M06-2X-D3/6-311+G(2d,p) level of theory;

<sup>b</sup>Gibbs free energy (E\*627.51);

<sup>c</sup>The relative Gibbs free energy;

<sup>d</sup>The Boltzmann distribution of each conformer.

**S94 Cartesian coordinates for the low-energy Conf. of Compound 6b at B3LYP/6311+G(d,p) level of theory in methanol**

Conformer 6b-1

| Center Number | Atomic Number | Atomic Type | Coordinates (Angstroms) |          |           |
|---------------|---------------|-------------|-------------------------|----------|-----------|
|               |               |             | X                       | Y        | Z         |
| 1             | 6             | 0           | 3.985394                | 2.713632 | -1.086965 |

|    |   |   |           |           |           |
|----|---|---|-----------|-----------|-----------|
| 2  | 6 | 0 | 4.830639  | 2.195181  | 0.029844  |
| 3  | 8 | 0 | 3.088897  | 1.742230  | -1.433504 |
| 4  | 6 | 0 | 4.205994  | 0.910026  | 0.494511  |
| 5  | 6 | 0 | 5.159841  | -0.156543 | 1.037354  |
| 6  | 6 | 0 | 1.829607  | -1.809094 | -2.028903 |
| 7  | 6 | 0 | 1.090233  | -0.590257 | -1.482927 |
| 8  | 6 | 0 | 3.373406  | 0.496745  | -0.736375 |
| 9  | 6 | 0 | 4.631388  | -1.603779 | 1.024305  |
| 10 | 6 | 0 | 2.489029  | -2.389690 | -1.022822 |
| 11 | 8 | 0 | 2.740096  | -0.893661 | 2.447868  |
| 12 | 6 | 0 | 2.066717  | -0.163482 | -0.346360 |
| 13 | 6 | 0 | 3.151178  | -1.828686 | 1.431803  |
| 14 | 6 | 0 | 2.194802  | -1.598541 | 0.247196  |
| 15 | 8 | 0 | 4.023453  | 3.787089  | -1.634770 |
| 16 | 6 | 0 | 5.926605  | 2.830140  | 0.443151  |
| 17 | 6 | 0 | 0.660008  | 0.431979  | -2.523502 |
| 18 | 6 | 0 | 2.996075  | -3.256171 | 1.976349  |
| 19 | 8 | 0 | -4.037894 | -0.543390 | 1.799966  |
| 20 | 6 | 0 | -1.006062 | -2.118936 | -1.334928 |
| 21 | 6 | 0 | -0.083303 | -1.155643 | -0.582501 |
| 22 | 8 | 0 | -2.272803 | -2.028490 | -0.829017 |
| 23 | 6 | 0 | -1.142280 | -0.130305 | -0.093833 |
| 24 | 6 | 0 | -0.778640 | 0.944655  | 0.942468  |
| 25 | 6 | 0 | -5.705376 | -0.099108 | -0.820709 |
| 26 | 6 | 0 | -4.880495 | -1.058618 | -0.352315 |
| 27 | 6 | 0 | -2.305457 | -1.073697 | 0.258883  |
| 28 | 6 | 0 | -1.957991 | 1.545165  | 1.731184  |
| 29 | 6 | 0 | -5.192219 | 1.234636  | -0.489203 |
| 30 | 6 | 0 | -3.702593 | -0.424656 | 0.406489  |
| 31 | 6 | 0 | -3.174491 | 2.072074  | 0.940311  |
| 32 | 6 | 0 | -3.730425 | 1.043241  | -0.065903 |
| 33 | 8 | 0 | -0.752774 | -2.867837 | -2.243146 |
| 34 | 6 | 0 | 0.684993  | -1.887191 | 0.567451  |
| 35 | 6 | 0 | -5.135882 | -2.526075 | -0.327530 |
| 36 | 6 | 0 | -2.857258 | 3.393670  | 0.238012  |
| 37 | 8 | 0 | -5.802288 | 2.295899  | -0.490987 |
| 38 | 8 | 0 | -4.190153 | 2.276497  | 1.953480  |
| 39 | 1 | 0 | 3.486031  | 1.145567  | 1.288392  |
| 40 | 1 | 0 | 5.426045  | 0.124431  | 2.062816  |
| 41 | 1 | 0 | 6.093611  | -0.134340 | 0.462295  |
| 42 | 1 | 0 | 1.729207  | -2.168647 | -3.044625 |
| 43 | 1 | 0 | 3.952890  | -0.128133 | -1.423028 |
| 44 | 1 | 0 | 4.769705  | -2.035508 | 0.026845  |
| 45 | 1 | 0 | 5.273300  | -2.193791 | 1.691172  |

|    |   |   |           |           |           |
|----|---|---|-----------|-----------|-----------|
| 46 | 1 | 0 | 3.023197  | -3.333244 | -1.052935 |
| 47 | 1 | 0 | 3.225861  | -1.109655 | 3.259427  |
| 48 | 1 | 0 | 1.579375  | 0.506993  | 0.361886  |
| 49 | 1 | 0 | 6.551044  | 2.447662  | 1.245250  |
| 50 | 1 | 0 | 6.218959  | 3.764534  | -0.026995 |
| 51 | 1 | 0 | 0.272583  | 1.346776  | -2.065500 |
| 52 | 1 | 0 | 1.504590  | 0.725029  | -3.150329 |
| 53 | 1 | 0 | -0.117123 | 0.007282  | -3.170390 |
| 54 | 1 | 0 | 3.273082  | -4.005484 | 1.227667  |
| 55 | 1 | 0 | 3.655244  | -3.400737 | 2.841669  |
| 56 | 1 | 0 | 1.968608  | -3.447197 | 2.295491  |
| 57 | 1 | 0 | -4.416560 | 0.313567  | 2.086376  |
| 58 | 1 | 0 | -1.458155 | 0.390179  | -1.003109 |
| 59 | 1 | 0 | -0.232094 | 1.740253  | 0.423283  |
| 60 | 1 | 0 | -0.085612 | 0.539060  | 1.687229  |
| 61 | 1 | 0 | -6.679579 | -0.257108 | -1.270272 |
| 62 | 1 | 0 | -2.112264 | -1.614516 | 1.191012  |
| 63 | 1 | 0 | -2.324630 | 0.793421  | 2.431376  |
| 64 | 1 | 0 | -1.581343 | 2.377796  | 2.335887  |
| 65 | 1 | 0 | -3.172129 | 1.113794  | -1.004882 |
| 66 | 1 | 0 | 0.418934  | -1.487143 | 1.548549  |
| 67 | 1 | 0 | 0.485439  | -2.960836 | 0.574980  |
| 68 | 1 | 0 | -6.138749 | -2.762995 | -0.693193 |
| 69 | 1 | 0 | -4.393943 | -3.057655 | -0.930172 |
| 70 | 1 | 0 | -5.038347 | -2.890565 | 0.702374  |
| 71 | 1 | 0 | -3.728787 | 3.755406  | -0.314981 |
| 72 | 1 | 0 | -2.567921 | 4.145241  | 0.979111  |
| 73 | 1 | 0 | -2.029815 | 3.270633  | -0.470261 |
| 74 | 1 | 0 | -4.943538 | 2.689207  | 1.491246  |

Conformer 6b-2

| Center<br>Number | Atomic<br>Number | Atomic<br>Type | Coordinates (Angstroms) |           |           |
|------------------|------------------|----------------|-------------------------|-----------|-----------|
|                  |                  |                | X                       | Y         | Z         |
| 1                | 6                | 0              | 3.972054                | 2.726849  | -1.068493 |
| 2                | 6                | 0              | 4.822927                | 2.203620  | 0.041147  |
| 3                | 8                | 0              | 3.079185                | 1.753052  | -1.420960 |
| 4                | 6                | 0              | 4.207884                | 0.910596  | 0.497102  |
| 5                | 6                | 0              | 5.167823                | -0.156637 | 1.026758  |
| 6                | 6                | 0              | 1.824741                | -1.798620 | -2.038339 |
| 7                | 6                | 0              | 1.089163                | -0.582316 | -1.482424 |
| 8                | 6                | 0              | 3.372877                | 0.504044  | -0.734354 |
| 9                | 6                | 0              | 4.641746                | -1.604079 | 1.000858  |
| 10               | 6                | 0              | 2.482826                | -2.388248 | -1.036941 |
| 11               | 8                | 0              | 2.895234                | -0.914196 | 2.488443  |
| 12               | 6                | 0              | 2.069632                | -0.163843 | -0.345761 |

|    |   |   |           |           |           |
|----|---|---|-----------|-----------|-----------|
| 13 | 6 | 0 | 3.172492  | -1.838653 | 1.420080  |
| 14 | 6 | 0 | 2.201462  | -1.601597 | 0.239870  |
| 15 | 8 | 0 | 4.000963  | 3.804808  | -1.608052 |
| 16 | 6 | 0 | 5.915684  | 2.841708  | 0.458245  |
| 17 | 6 | 0 | 0.655764  | 0.446197  | -2.515560 |
| 18 | 6 | 0 | 3.030836  | -3.272306 | 1.951229  |
| 19 | 8 | 0 | -4.027530 | -0.538363 | 1.809595  |
| 20 | 6 | 0 | -1.006285 | -2.116818 | -1.335332 |
| 21 | 6 | 0 | -0.082367 | -1.152761 | -0.583320 |
| 22 | 8 | 0 | -2.272050 | -2.028482 | -0.825815 |
| 23 | 6 | 0 | -1.142891 | -0.130449 | -0.091544 |
| 24 | 6 | 0 | -0.780312 | 0.950150  | 0.938697  |
| 25 | 6 | 0 | -5.710134 | -0.115052 | -0.807238 |
| 26 | 6 | 0 | -4.881242 | -1.069528 | -0.335863 |
| 27 | 6 | 0 | -2.304291 | -1.075387 | 0.262934  |
| 28 | 6 | 0 | -1.959539 | 1.556331  | 1.723181  |
| 29 | 6 | 0 | -5.198188 | 1.222197  | -0.487815 |
| 30 | 6 | 0 | -3.701518 | -0.427783 | 0.413223  |
| 31 | 6 | 0 | -3.178280 | 2.074063  | 0.929228  |
| 32 | 6 | 0 | -3.734127 | 1.036800  | -0.068613 |
| 33 | 8 | 0 | -0.754289 | -2.863736 | -2.244926 |
| 34 | 6 | 0 | 0.690262  | -1.888681 | 0.561845  |
| 35 | 6 | 0 | -5.132417 | -2.537500 | -0.300390 |
| 36 | 6 | 0 | -2.864873 | 3.391082  | 0.216757  |
| 37 | 8 | 0 | -5.809836 | 2.282284  | -0.495371 |
| 38 | 8 | 0 | -4.191840 | 2.282903  | 1.943130  |
| 39 | 1 | 0 | 3.491614  | 1.135824  | 1.297487  |
| 40 | 1 | 0 | 5.430755  | 0.108794  | 2.055367  |
| 41 | 1 | 0 | 6.097975  | -0.127341 | 0.445858  |
| 42 | 1 | 0 | 1.723905  | -2.149071 | -3.057314 |
| 43 | 1 | 0 | 3.952397  | -0.113276 | -1.427836 |
| 44 | 1 | 0 | 4.766100  | -2.022658 | -0.003609 |
| 45 | 1 | 0 | 5.287255  | -2.196977 | 1.658507  |
| 46 | 1 | 0 | 3.017344  | -3.331162 | -1.074908 |
| 47 | 1 | 0 | 2.096551  | -1.220605 | 2.944305  |
| 48 | 1 | 0 | 1.584199  | 0.501841  | 0.368951  |
| 49 | 1 | 0 | 6.542885  | 2.455283  | 1.256176  |
| 50 | 1 | 0 | 6.201658  | 3.782138  | -0.003759 |
| 51 | 1 | 0 | 0.270108  | 1.358724  | -2.051637 |
| 52 | 1 | 0 | 1.499079  | 0.742696  | -3.142299 |
| 53 | 1 | 0 | -0.122836 | 0.025494  | -3.163389 |
| 54 | 1 | 0 | 3.296363  | -4.013161 | 1.190373  |
| 55 | 1 | 0 | 3.693461  | -3.409997 | 2.810998  |
| 56 | 1 | 0 | 2.004103  | -3.482442 | 2.272490  |

|    |   |   |           |           |           |
|----|---|---|-----------|-----------|-----------|
| 57 | 1 | 0 | -4.413945 | 0.316843  | 2.090865  |
| 58 | 1 | 0 | -1.460791 | 0.387697  | -1.001218 |
| 59 | 1 | 0 | -0.230525 | 1.741065  | 0.416297  |
| 60 | 1 | 0 | -0.087830 | 0.549693  | 1.687375  |
| 61 | 1 | 0 | -6.685589 | -0.278136 | -1.252178 |
| 62 | 1 | 0 | -2.110002 | -1.617335 | 1.194409  |
| 63 | 1 | 0 | -2.324834 | 0.810492  | 2.430215  |
| 64 | 1 | 0 | -1.583320 | 2.395157  | 2.319410  |
| 65 | 1 | 0 | -3.179620 | 1.102760  | -1.010218 |
| 66 | 1 | 0 | 0.405007  | -1.484983 | 1.539529  |
| 67 | 1 | 0 | 0.486427  | -2.961268 | 0.575453  |
| 68 | 1 | 0 | -6.135588 | -2.779724 | -0.661557 |
| 69 | 1 | 0 | -4.391026 | -3.071082 | -0.902008 |
| 70 | 1 | 0 | -5.031073 | -2.894990 | 0.731614  |
| 71 | 1 | 0 | -3.738007 | 3.746634  | -0.337653 |
| 72 | 1 | 0 | -2.576297 | 4.148906  | 0.951711  |
| 73 | 1 | 0 | -2.038198 | 3.264832  | -0.491892 |
| 74 | 1 | 0 | -4.946628 | 2.692897  | 1.480736  |

Conformer 6b-3

| Center<br>Number | Atomic<br>Number | Atomic<br>Type | Coordinates (Angstroms) |           |           |
|------------------|------------------|----------------|-------------------------|-----------|-----------|
|                  |                  |                | X                       | Y         | Z         |
| 1                | 6                | 0              | 4.052114                | 2.691324  | -1.105931 |
| 2                | 6                | 0              | 4.885389                | 2.176883  | 0.021747  |
| 3                | 8                | 0              | 3.118065                | 1.741493  | -1.415582 |
| 4                | 6                | 0              | 4.211728                | 0.930603  | 0.527302  |
| 5                | 6                | 0              | 5.115103                | -0.145622 | 1.144219  |
| 6                | 6                | 0              | 1.834303                | -1.756050 | -2.041904 |
| 7                | 6                | 0              | 1.091435                | -0.550459 | -1.470918 |
| 8                | 6                | 0              | 3.381603                | 0.502762  | -0.700064 |
| 9                | 6                | 0              | 4.609213                | -1.598170 | 1.062356  |
| 10               | 6                | 0              | 2.486548                | -2.361349 | -1.045972 |
| 11               | 8                | 0              | 2.729468                | -1.098326 | 2.582310  |
| 12               | 6                | 0              | 2.067331                | -0.152663 | -0.322010 |
| 13               | 6                | 0              | 3.129722                | -1.871336 | 1.438478  |
| 14               | 6                | 0              | 2.185211                | -1.604566 | 0.244381  |
| 15               | 8                | 0              | 4.124083                | 3.745784  | -1.684576 |
| 16               | 6                | 0              | 6.006402                | 2.778255  | 0.416312  |
| 17               | 6                | 0              | 0.664571                | 0.495710  | -2.489126 |
| 18               | 6                | 0              | 3.002319                | -3.324003 | 1.906965  |
| 19               | 8                | 0              | -4.055705               | -0.572492 | 1.777568  |
| 20               | 6                | 0              | -1.005643               | -2.077725 | -1.374612 |
| 21               | 6                | 0              | -0.087240               | -1.135566 | -0.589846 |
| 22               | 8                | 0              | -2.275518               | -1.999853 | -0.875318 |
| 23               | 6                | 0              | -1.149835               | -0.122557 | -0.083423 |

|    |   |   |           |           |           |
|----|---|---|-----------|-----------|-----------|
| 24 | 6 | 0 | -0.795310 | 0.925382  | 0.982460  |
| 25 | 6 | 0 | -5.709033 | -0.077419 | -0.843996 |
| 26 | 6 | 0 | -4.887109 | -1.046075 | -0.389217 |
| 27 | 6 | 0 | -2.316189 | -1.073908 | 0.236651  |
| 28 | 6 | 0 | -1.981764 | 1.516576  | 1.767934  |
| 29 | 6 | 0 | -5.197166 | 1.249598  | -0.485125 |
| 30 | 6 | 0 | -3.713705 | -0.427023 | 0.388518  |
| 31 | 6 | 0 | -3.189145 | 2.059303  | 0.973223  |
| 32 | 6 | 0 | -3.738044 | 1.049378  | -0.055999 |
| 33 | 8 | 0 | -0.745962 | -2.800552 | -2.301669 |
| 34 | 6 | 0 | 0.673363  | -1.896612 | 0.544770  |
| 35 | 6 | 0 | -5.142050 | -2.513731 | -0.394300 |
| 36 | 6 | 0 | -2.862337 | 3.391936  | 0.296429  |
| 37 | 8 | 0 | -5.805461 | 2.311741  | -0.472159 |
| 38 | 8 | 0 | -4.212678 | 2.248624  | 1.980423  |
| 39 | 1 | 0 | 3.481629  | 1.266708  | 1.283349  |
| 40 | 1 | 0 | 5.291243  | 0.114434  | 2.193478  |
| 41 | 1 | 0 | 6.092234  | -0.107119 | 0.649061  |
| 42 | 1 | 0 | 1.740819  | -2.088366 | -3.067483 |
| 43 | 1 | 0 | 3.966724  | -0.136289 | -1.367444 |
| 44 | 1 | 0 | 4.775739  | -1.985416 | 0.050626  |
| 45 | 1 | 0 | 5.247033  | -2.193654 | 1.724936  |
| 46 | 1 | 0 | 3.023152  | -3.302292 | -1.095493 |
| 47 | 1 | 0 | 2.731003  | -0.163060 | 2.330574  |
| 48 | 1 | 0 | 1.573357  | 0.515934  | 0.387981  |
| 49 | 1 | 0 | 6.614842  | 2.395434  | 1.230278  |
| 50 | 1 | 0 | 6.336532  | 3.684394  | -0.083126 |
| 51 | 1 | 0 | 0.280499  | 1.402260  | -2.011952 |
| 52 | 1 | 0 | 1.508143  | 0.797860  | -3.112518 |
| 53 | 1 | 0 | -0.115770 | 0.086451  | -3.141872 |
| 54 | 1 | 0 | 3.333848  | -4.021201 | 1.131641  |
| 55 | 1 | 0 | 3.625187  | -3.470990 | 2.794063  |
| 56 | 1 | 0 | 1.970402  | -3.562380 | 2.175245  |
| 57 | 1 | 0 | -4.444114 | 0.275463  | 2.076779  |
| 58 | 1 | 0 | -1.458352 | 0.422200  | -0.980745 |
| 59 | 1 | 0 | -0.234745 | 1.728806  | 0.490550  |
| 60 | 1 | 0 | -0.119725 | 0.494112  | 1.729564  |
| 61 | 1 | 0 | -6.680441 | -0.226447 | -1.302517 |
| 62 | 1 | 0 | -2.130411 | -1.638289 | 1.156178  |
| 63 | 1 | 0 | -2.357185 | 0.753970  | 2.451206  |
| 64 | 1 | 0 | -1.610142 | 2.338248  | 2.390495  |
| 65 | 1 | 0 | -3.174325 | 1.137660  | -0.990269 |
| 66 | 1 | 0 | 0.403924  | -1.526593 | 1.537098  |
| 67 | 1 | 0 | 0.474467  | -2.969813 | 0.524316  |



|    |   |   |           |           |           |
|----|---|---|-----------|-----------|-----------|
| 68 | 1 | 0 | -6.142397 | -2.743911 | -0.770877 |
| 69 | 1 | 0 | -4.396220 | -3.033371 | -1.002606 |
| 70 | 1 | 0 | -5.050796 | -2.898195 | 0.628885  |
| 71 | 1 | 0 | -3.728142 | 3.764904  | -0.258081 |
| 72 | 1 | 0 | -2.578405 | 4.130354  | 1.052711  |
| 73 | 1 | 0 | -2.029053 | 3.279201  | -0.406865 |
| 74 | 1 | 0 | -4.961608 | 2.670395  | 1.519038  |

Conformer 6b-4

| Center<br>Number | Atomic<br>Number | Atomic<br>Type | Coordinates (Angstroms) |           |           |
|------------------|------------------|----------------|-------------------------|-----------|-----------|
|                  |                  |                | X                       | Y         | Z         |
| 1                | 6                | 0              | -4.065460               | 2.793940  | 0.747647  |
| 2                | 6                | 0              | -4.898694               | 2.142165  | -0.306547 |
| 3                | 8                | 0              | -3.154320               | 1.881851  | 1.199908  |
| 4                | 6                | 0              | -4.253671               | 0.823136  | -0.625445 |
| 5                | 6                | 0              | -5.191285               | -0.312657 | -1.041841 |
| 6                | 6                | 0              | -1.841124               | -1.560427 | 2.178096  |
| 7                | 6                | 0              | -1.115559               | -0.399044 | 1.503125  |
| 8                | 6                | 0              | -3.414221               | 0.562937  | 0.642290  |
| 9                | 6                | 0              | -4.638223               | -1.740166 | -0.868611 |
| 10               | 6                | 0              | -2.481393               | -2.260579 | 1.237925  |
| 11               | 8                | 0              | -2.768495               | -1.159631 | -2.373942 |
| 12               | 6                | 0              | -2.095916               | -0.114055 | 0.326333  |
| 13               | 6                | 0              | -3.155527               | -1.982402 | -1.257573 |
| 14               | 6                | 0              | -2.198858               | -1.606102 | -0.109995 |
| 15               | 8                | 0              | -4.123267               | 3.920283  | 1.174412  |
| 16               | 6                | 0              | -6.002594               | 2.710539  | -0.789793 |
| 17               | 6                | 0              | -0.702378               | 0.741419  | 2.419837  |
| 18               | 6                | 0              | -2.975889               | -3.458566 | -1.641292 |
| 19               | 8                | 0              | 3.612008                | -0.427561 | -1.918260 |
| 20               | 6                | 0              | 0.989586                | -1.921661 | 1.561712  |
| 21               | 6                | 0              | 0.069949                | -1.050805 | 0.678050  |
| 22               | 8                | 0              | 2.277868                | -1.864793 | 1.092588  |
| 23               | 6                | 0              | 1.146645                | -0.097125 | 0.101546  |
| 24               | 6                | 0              | 0.973695                | 0.852407  | -1.092072 |
| 25               | 6                | 0              | 5.848207                | -0.476653 | 0.331490  |
| 26               | 6                | 0              | 4.851605                | -1.284732 | -0.071926 |
| 27               | 6                | 0              | 2.274766                | -1.091474 | -0.127994 |
| 28               | 6                | 0              | 1.758315                | 2.154871  | -0.843601 |
| 29               | 6                | 0              | 5.429861                | 0.927272  | 0.257855  |
| 30               | 6                | 0              | 3.623981                | -0.466203 | -0.484150 |
| 31               | 6                | 0              | 3.292593                | 2.162940  | -0.588398 |
| 32               | 6                | 0              | 3.886054                | 0.930791  | 0.141692  |
| 33               | 8                | 0              | 0.715473                | -2.566768 | 2.539886  |
| 34               | 6                | 0              | -0.683883               | -1.889355 | -0.406705 |

|    |   |   |           |           |           |
|----|---|---|-----------|-----------|-----------|
| 35 | 6 | 0 | 4.894976  | -2.756899 | -0.289240 |
| 36 | 6 | 0 | 3.602998  | 3.454394  | 0.184216  |
| 37 | 8 | 0 | 6.165321  | 1.903153  | 0.220362  |
| 38 | 8 | 0 | 3.929306  | 2.237062  | -1.896738 |
| 39 | 1 | 0 | -3.538446 | 0.978116  | -1.442976 |
| 40 | 1 | 0 | -5.463639 | -0.152869 | -2.091431 |
| 41 | 1 | 0 | -6.124215 | -0.241032 | -0.469433 |
| 42 | 1 | 0 | -1.743540 | -1.804088 | 3.227776  |
| 43 | 1 | 0 | -3.982373 | 0.005807  | 1.393596  |
| 44 | 1 | 0 | -4.765695 | -2.059155 | 0.171720  |
| 45 | 1 | 0 | -5.271799 | -2.412256 | -1.461748 |
| 46 | 1 | 0 | -3.000907 | -3.203488 | 1.369698  |
| 47 | 1 | 0 | -3.252890 | -1.475761 | -3.152804 |
| 48 | 1 | 0 | -1.616254 | 0.482867  | -0.450895 |
| 49 | 1 | 0 | -6.617925 | 2.231791  | -1.545919 |
| 50 | 1 | 0 | -6.310888 | 3.686607  | -0.426683 |
| 51 | 1 | 0 | -0.330282 | 1.602862  | 1.857291  |
| 52 | 1 | 0 | -1.551023 | 1.090351  | 3.011603  |
| 53 | 1 | 0 | 0.083038  | 0.407597  | 3.108762  |
| 54 | 1 | 0 | -3.234067 | -4.125711 | -0.812470 |
| 55 | 1 | 0 | -3.636792 | -3.710272 | -2.480396 |
| 56 | 1 | 0 | -1.946631 | -3.663830 | -1.945290 |
| 57 | 1 | 0 | 3.857442  | 0.484044  | -2.192449 |
| 58 | 1 | 0 | 1.455434  | 0.515196  | 0.957450  |
| 59 | 1 | 0 | -0.070240 | 1.142254  | -1.233537 |
| 60 | 1 | 0 | 1.294333  | 0.365154  | -2.016111 |
| 61 | 1 | 0 | 6.866400  | -0.769354 | 0.563076  |
| 62 | 1 | 0 | 2.029774  | -1.768194 | -0.954254 |
| 63 | 1 | 0 | 1.606807  | 2.840199  | -1.684503 |
| 64 | 1 | 0 | 1.295697  | 2.632466  | 0.028706  |
| 65 | 1 | 0 | 3.515518  | 0.909025  | 1.174750  |
| 66 | 1 | 0 | -0.429563 | -1.547846 | -1.413753 |
| 67 | 1 | 0 | -0.460387 | -2.956251 | -0.338867 |
| 68 | 1 | 0 | 5.891483  | -3.165126 | -0.101135 |
| 69 | 1 | 0 | 4.173002  | -3.257866 | 0.365159  |
| 70 | 1 | 0 | 4.609148  | -2.980043 | -1.324697 |
| 71 | 1 | 0 | 4.678307  | 3.605904  | 0.282749  |
| 72 | 1 | 0 | 3.160169  | 4.306750  | -0.341185 |
| 73 | 1 | 0 | 3.171245  | 3.409743  | 1.189967  |
| 74 | 1 | 0 | 4.857288  | 2.480216  | -1.727284 |

**S95. Experimental and calculated <sup>13</sup>C NMR chemical shifts of 6a and 6b**

| NO. | $\delta_{\text{exptl.}}$ | $\delta_{\text{calcd.}}$ (ppm) |           | NO. | $\delta_{\text{exptl.}}$ | $\delta_{\text{calcd.}}$ (ppm) |           |
|-----|--------------------------|--------------------------------|-----------|-----|--------------------------|--------------------------------|-----------|
|     |                          | <b>6a</b>                      | <b>6b</b> |     |                          | <b>6a</b>                      | <b>6b</b> |
| 1   | 64.2                     | 67.3                           | 67.1      | 1'  | 68.4                     | 69.4                           | 60.8      |
| 2   | 133.9                    | 134.3                          | 134.7     | 2'  | 203.8                    | 203.3                          | 204.8     |
| 3   | 141.5                    | 140.5                          | 140.2     | 3'  | 131.5                    | 128.7                          | 127.1     |
| 4   | 57.6                     | 61.2                           | 61.3      | 4'  | 179.3                    | 185.9                          | 185.5     |
| 5   | 66.5                     | 67.9                           | 68.1      | 5'  | 83                       | 85.1                           | 83.0      |
| 6   | 80.1                     | 79.2                           | 79.1      | 6'  | 84                       | 85.1                           | 83.9      |
| 7   | 43.7                     | 47.8                           | 47.2      | 7'  | 42.6                     | 46.4                           | 50.2      |
| 8   | 23.7                     | 27.8                           | 27.6      | 8'  | 21.7                     | 24.7                           | 24.8      |
| 9   | 35.1                     | 36.8                           | 37.3      | 9'  | 37.4                     | 37.4                           | 36.8      |
| 10  | 73.2                     | 74.9                           | 75.3      | 10' | 70.8                     | 72.0                           | 75.4      |
| 11  | 141.1                    | 142.0                          | 141.9     | 11' | 57.2                     | 61.7                           | 62.2      |
| 12  | 171.1                    | 168.9                          | 168.8     | 12' | 178.3                    | 177.4                          | 177.3     |
| 13  | 119                      | 119.9                          | 119.7     | 13' | 35.5                     | 38.0                           | 38.0      |
| 14  | 30.1                     | 29.8                           | 29.8      | 14' | 33.2                     | 32.4                           | 27.1      |
| 15  | 15.2                     | 17.3                           | 17.3      | 15' | 16.7                     | 19.6                           | 19.5      |
|     |                          |                                |           |     | <b>R<sup>2</sup></b>     | 0.9986                         | 0.9964    |
|     |                          |                                |           |     | <b>MAE</b>               | 2.1                            | 2.7       |
|     |                          |                                |           |     | <b>CMAE</b>              | 1.4                            | 2.3       |

**S96. Experimental and calculated <sup>1</sup>H NMR chemical shifts of 6a and 6b**

| NO.  | $\delta_{\text{exptl.}}$ | $\delta_{\text{calcd.}}$ (ppm) |           | NO.  | $\delta_{\text{exptl.}}$ | $\delta_{\text{calcd.}}$ (ppm) |           |
|------|--------------------------|--------------------------------|-----------|------|--------------------------|--------------------------------|-----------|
|      |                          | <b>6a</b>                      | <b>6b</b> |      |                          | <b>6a</b>                      | <b>6b</b> |
| 2    | 5.89                     | 6.29                           | 6.33      | 1'   | 2.75                     | 6.21                           | 2.93      |
| 3    | 6.31                     | 6.72                           | 6.62      | 3'   | 6.25                     | 4.07                           | 6.04      |
| 5    | 2.34                     | 2.34                           | 2.19      | 6'   | 4.51                     | 3.51                           | 4.54      |
| 6    | 4.18                     | 4.18                           | 4.18      | 7'   | 2.89                     | 2.33                           | 2.44      |
| 7    | 3.25                     | 3.37                           | 3.42      | 8'a  | 2.29                     | 2.18                           | 1.91      |
| 8a   | 2.23                     | 2.26                           | 2.24      | 8'b  | 1.56                     | 2.05                           | 1.71      |
| 8b   | 1.49                     | 1.36                           | 1.37      | 9'a  | 1.90                     | 4.71                           | 1.59      |
| 9a   | 1.86                     | 1.81                           | 1.85      | 9'b  | 1.64                     | 2.65                           | 2.57      |
| 9b   | 1.86                     | 1.66                           | 1.63      | 13'a | 2.55                     | 2.63                           | 2.56      |
| 13b  | 5.38                     | 5.85                           | 5.84      | 13'b | 1.26                     | 1.97                           | 1.34      |
| 13a  | 6.11                     | 6.46                           | 6.44      | 14'a | 0.88                     | 2.42                           | 0.96      |
| 14a  | 1.31                     | 1.34                           | 1.37      | 14'b | 1.02                     | 2.32                           | 1.42      |
| 14b  | 1.31                     | 0.95                           | 0.92      | 14'c | 2.18                     | 2.59                           | 2.15      |
| w14c | 1.31                     | 1.13                           | 1.22      | 15'a | 2.26                     | 2.49                           | 2.20      |
| 15a  | 1.44                     | 1.15                           | 1.11      | 15'b | 2.27                     | 2.51                           | 2.76      |
| 15b  | 1.44                     | 1.60                           | 1.59      | 15'c | 2.71                     | 2.55                           | 2.41      |
| 15c  | 1.44                     | 1.18                           | 1.05      |      |                          |                                |           |

**S97. Linear regression analysis between the experimental and calculated <sup>13</sup>C NMR chemical shifts of 6a/6b.**

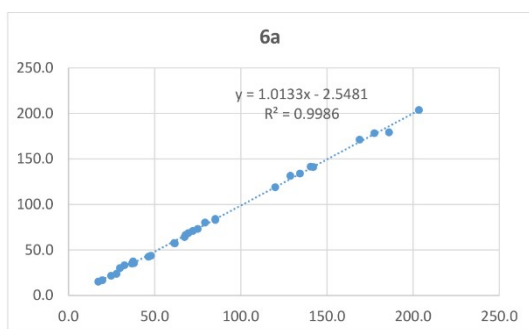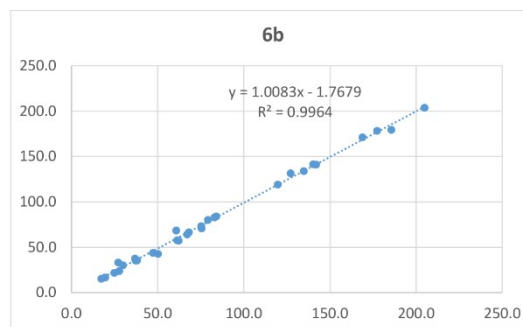

**S98. DP4+ probability analysis of 6a/6b.**

| Functional       | Solvent? |          | Basis Set    |          | Type of Data    |          |
|------------------|----------|----------|--------------|----------|-----------------|----------|
| mPW1PW91         | PCM      |          | 6-311G(d, p) |          | Unscaled Shifts |          |
|                  | Isomer 1 | Isomer 2 | Isomer 3     | Isomer 4 | Isomer 5        | Isomer 6 |
| sDP4+ (H data)   | 99.83%   | 0.17%    |              |          |                 |          |
| sDP4+ (C data)   | 100.00%  | 0.00%    |              |          |                 |          |
| sDP4+ (all data) | 100.00%  | 0.00%    |              |          |                 |          |
| uDP4+ (H data)   | 99.92%   | 0.08%    |              |          |                 |          |
| uDP4+ (C data)   | 100.00%  | 0.00%    |              |          |                 |          |
| uDP4+ (all data) | 100.00%  | 0.00%    |              |          |                 |          |
| DP4+ (H data)    | 100.00%  | 0.00%    |              |          |                 |          |
| DP4+ (C data)    | 100.00%  | 0.00%    |              |          |                 |          |
| DP4+ (all data)  | 100.00%  | 0.00%    |              |          |                 |          |
